# Supplementary material for: Lasianosides A–E: New Iridoid Glucosides from the Leaves of Lasianthus verticillatus (Lour.) Merr. and Their Antioxidant Activity
Source: MDPI journal article supplement (doi:10.3390/molecules24213995), 2019-11-05
Supplement: s1 [file s1]

## Spectral Data

Lasianosides A-E: iridoid glucosides from the aerial parts of *Lasianthus verticillatus* (Lour.) Merr.

Gadah Al-Hamoud<sup>1,2</sup>, Raha Saud Orfali<sup>2</sup>, Shagufta Perveen, Kenta Mizuno<sup>3</sup>, Yoshio Takeda<sup>3</sup>, Tatsuo Nehira<sup>4</sup>, Kazuma Masuda<sup>4</sup>, Sachiko Sugimoto<sup>1</sup>, Yoshi Yamano<sup>1</sup>, Hideaki Otsuka<sup>1,5</sup>, Katsuyoshi Matsunami<sup>1,\*</sup>

1. Graduate School of Biomedical and Health Sciences, Hiroshima University, 1-2-3 Kasumi, Minami-ku, Hiroshima 734-8553

2 Department of Pharmacognosy, College of Pharmacy, King Saud University, Riyadh 11495, Kingdom of Saudi Arabia

3 Faculty of Integrated Arts and Sciences, The University of Tokushima, 1-1 Minamijosanjima-Cho, Tokushima 770-8502, Japan

4 Graduate School of Integrated Arts and Sciences, Hiroshima University, 1-7-1 Kagamiyama, Higashi-Hiroshima 739-8521, Japan

5 Faculty of Pharmacy, Yasuda Women's University, 6-13-1 Yasuhigashi, Asaminami-ku, Hiroshima 731-0153, Japan

## Contents:

- Figure 1.** The HRESIMS spectrum of **1**.  
**Figure 2.** The  $^1\text{H}$  NMR spectrum of **1** in  $\text{CD}_3\text{OD}$ , 500 MHz.  
**Figure 3.** The  $^{13}\text{C}$  NMR spectrum of **1** in  $\text{CD}_3\text{OD}$ , 175 MHz.  
**Figure 4.** The DEPT-135 NMR spectrum of **1** in  $\text{CD}_3\text{OD}$ , 175 MHz.  
**Figure 5.** The COSY spectrum of **1** in  $\text{CD}_3\text{OD}$ , 700 MHz.  
**Figure 6.** The HSQC spectrum of **1** in  $\text{CD}_3\text{OD}$ , 700 MHz.  
**Figure 7.** The HMBC spectrum of **1** in  $\text{CD}_3\text{OD}$ , 700 MHz.  
**Figure 8.** The NOESY spectrum of **1** in  $\text{CD}_3\text{OD}$ , 500 MHz.  
**Figure 9.** The IR spectrum of **1**.  
**Figure 10.** The HRESIMS spectrum of **2**.  
**Figure 11.** The  $^1\text{H}$  NMR spectrum of **2** in  $\text{CD}_3\text{OD}$ , 500 MHz.  
**Figure 12.** The  $^{13}\text{C}$  NMR spectrum of **2** in  $\text{CD}_3\text{OD}$ , 175 MHz.  
**Figure 13.** The DEPT-135 NMR spectrum of **2** in  $\text{CD}_3\text{OD}$ , 175 MHz.  
**Figure 14.** The COSY spectrum of **2** in  $\text{CD}_3\text{OD}$ , 700 MHz.  
**Figure 15.** The HSQC spectrum of **2** in  $\text{CD}_3\text{OD}$ , 700 MHz.  
**Figure 16.** The HMBC spectrum of **2** in  $\text{CD}_3\text{OD}$ , 700 MHz.  
**Figure 17.** The NOESY spectrum of **2** in  $\text{CD}_3\text{OD}$ , 500 MHz.  
**Figure 18.** The IR spectrum of **2**.  
**Figure 19.** The HRESIMS spectrum of **3**.  
**Figure 20.** The  $^1\text{H}$  NMR spectrum of **3** in  $\text{CD}_3\text{OD}$ , 500 MHz.  
**Figure 21.** The  $^{13}\text{C}$  NMR spectrum of **3** in  $\text{CD}_3\text{OD}$ , 175 MHz.  
**Figure 22.** The DEPT-135 NMR spectrum of **3** in  $\text{CD}_3\text{OD}$ , 175 MHz.  
**Figure 23.** The COSY spectrum of **3** in  $\text{CD}_3\text{OD}$ , 700 MHz.  
**Figure 24.** The HSQC spectrum of **3** in  $\text{CD}_3\text{OD}$ , 700 MHz.  
**Figure 25.** The HMBC spectrum of **3** in  $\text{CD}_3\text{OD}$ , 700 MHz.  
**Figure 26.** The NOESY spectrum of **3** in  $\text{CD}_3\text{OD}$ , 500 MHz.  
**Figure 27.** The IR spectrum of **3**.  
**Figure 28.** The UV spectrum of **3**.  
**Figure 29.** The HRESIMS spectrum of **4**.  
**Figure 30.** The  $^1\text{H}$  NMR spectrum of **4** in  $\text{CD}_3\text{OD}$ , 500 MHz.  
**Figure 31.** The  $^{13}\text{C}$  NMR spectrum of **4** in  $\text{CD}_3\text{OD}$ , 175 MHz.  
**Figure 32.** The DEPT-135 NMR spectrum of **4** in  $\text{CD}_3\text{OD}$ , 175 MHz.  
**Figure 33.** The COSY spectrum of **4** in  $\text{CD}_3\text{OD}$ , 500 MHz.  
**Figure 34.** The HSQC spectrum of **4** in  $\text{CD}_3\text{OD}$ , 700 MHz.  
**Figure 35.** The HMBC spectrum of **4** in  $\text{CD}_3\text{OD}$ , 700 MHz.  
**Figure 36.** The NOESY spectrum of **4** in  $\text{CD}_3\text{OD}$ , 500 MHz.  
**Figure 37.** The IR spectrum of **4**.  
**Figure 38.** The UV spectrum of **4**.  
**Figure 39.** The HRESIMS spectrum of **5**.  
**Figure 40.** The  $^1\text{H}$  NMR spectrum of **5** in  $\text{CD}_3\text{OD}$ , 500 MHz.

- Figure 41.** The  $^{13}\text{C}$  NMR spectrum of **5** in  $\text{CD}_3\text{OD}$ , 175 MHz.
- Figure 42.** The DEPT-135 NMR spectrum of **5** in  $\text{CD}_3\text{OD}$ , 175 MHz
- Figure 43.** The COSY spectrum of **5** in  $\text{CD}_3\text{OD}$ , 500 MHz
- Figure 44.** The HSQC spectrum of **5** in  $\text{CD}_3\text{OD}$ , 700 MHz.
- Figure 45.** The HMBC spectrum of **5** in  $\text{CD}_3\text{OD}$ , 700 MHz
- Figure 46.** The NOESY spectrum of **5** in  $\text{CD}_3\text{OD}$ , 500 MHz
- Figure 47.** The IR spectrum of **5**.
- Figure 48.** The UV spectrum of **5**.

**Figure 1.** The HRESIMS spectrum of **1**.

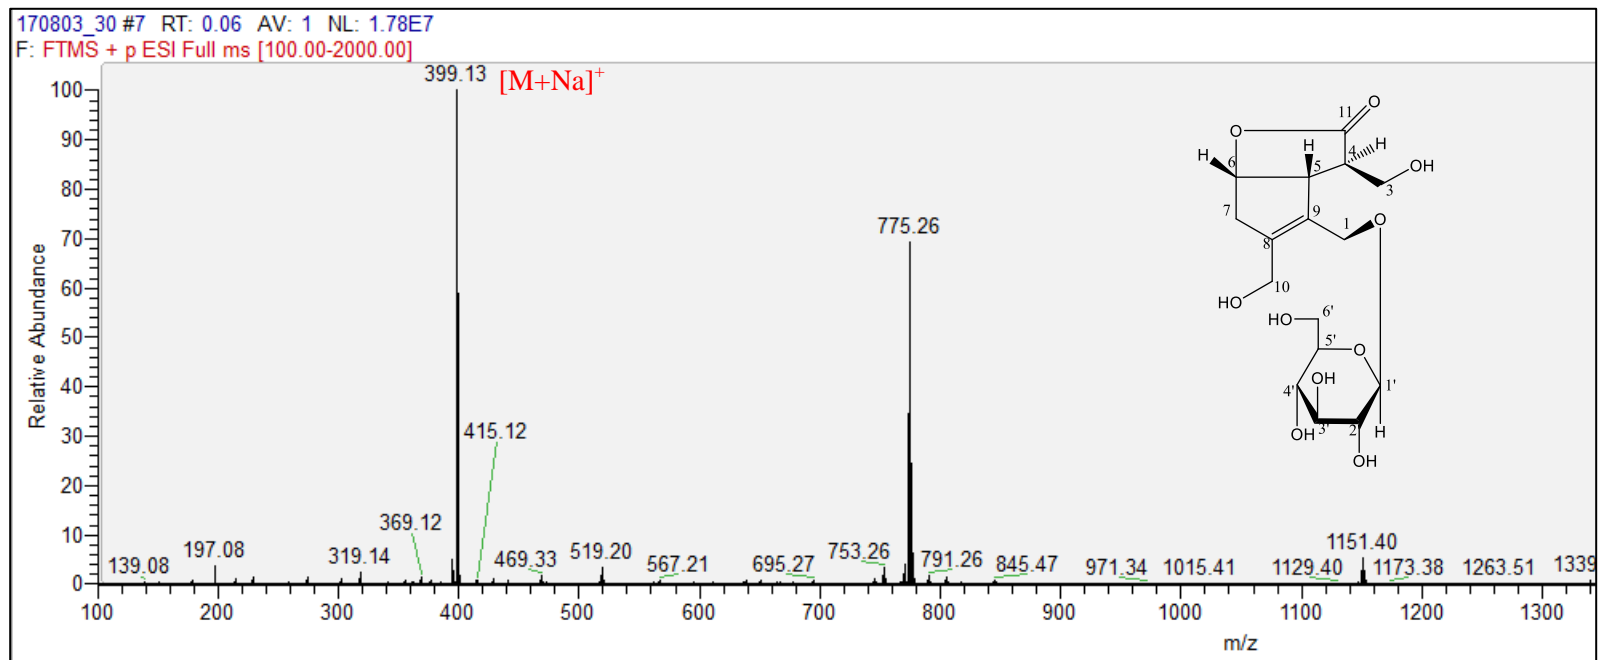

Elemental composition search on mass 399.13

m/z= 394.13-404.13

| m/z      | Theo. Mass | Delta (mmu) | RDB equiv. | Composition                                        |
|----------|------------|-------------|------------|----------------------------------------------------|
| 399.1263 | 399.1262   | 0.17        | 4.5        | C <sub>16</sub> H <sub>24</sub> O <sub>10</sub> Na |

**Figure 2.** The  $^1\text{H}$  NMR spectrum of **1** in  $\text{CD}_3\text{OD}$ , 500 MHz.

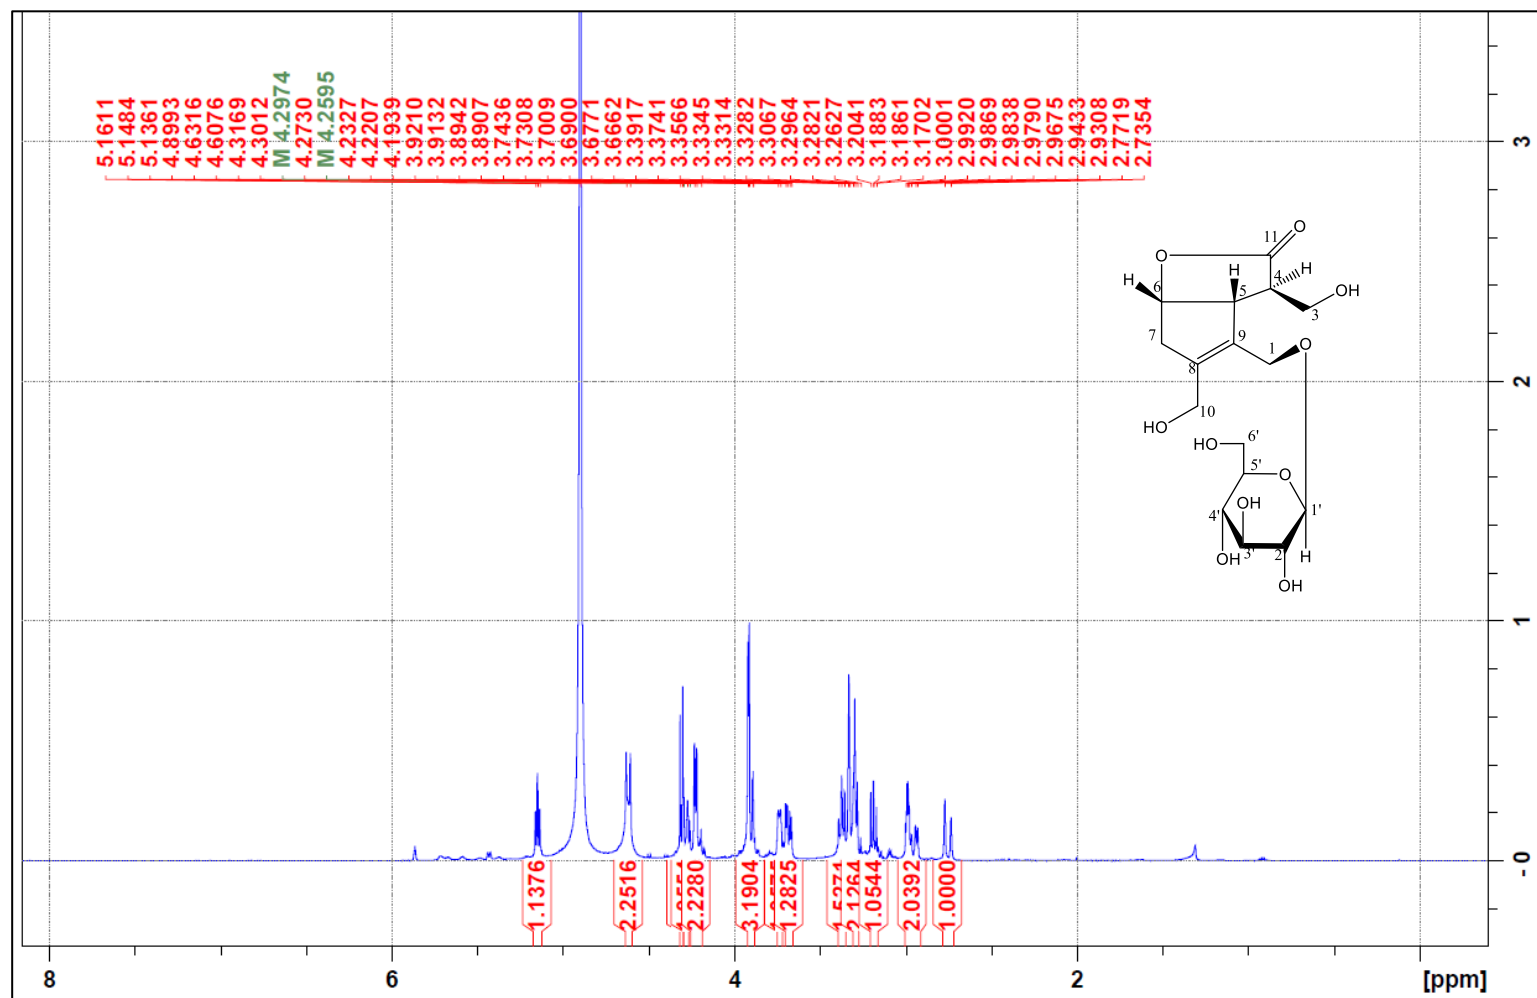

**Figure 3.** The  $^{13}\text{C}$  NMR spectrum of **1** in  $\text{CD}_3\text{OD}$ , 175 MHz.

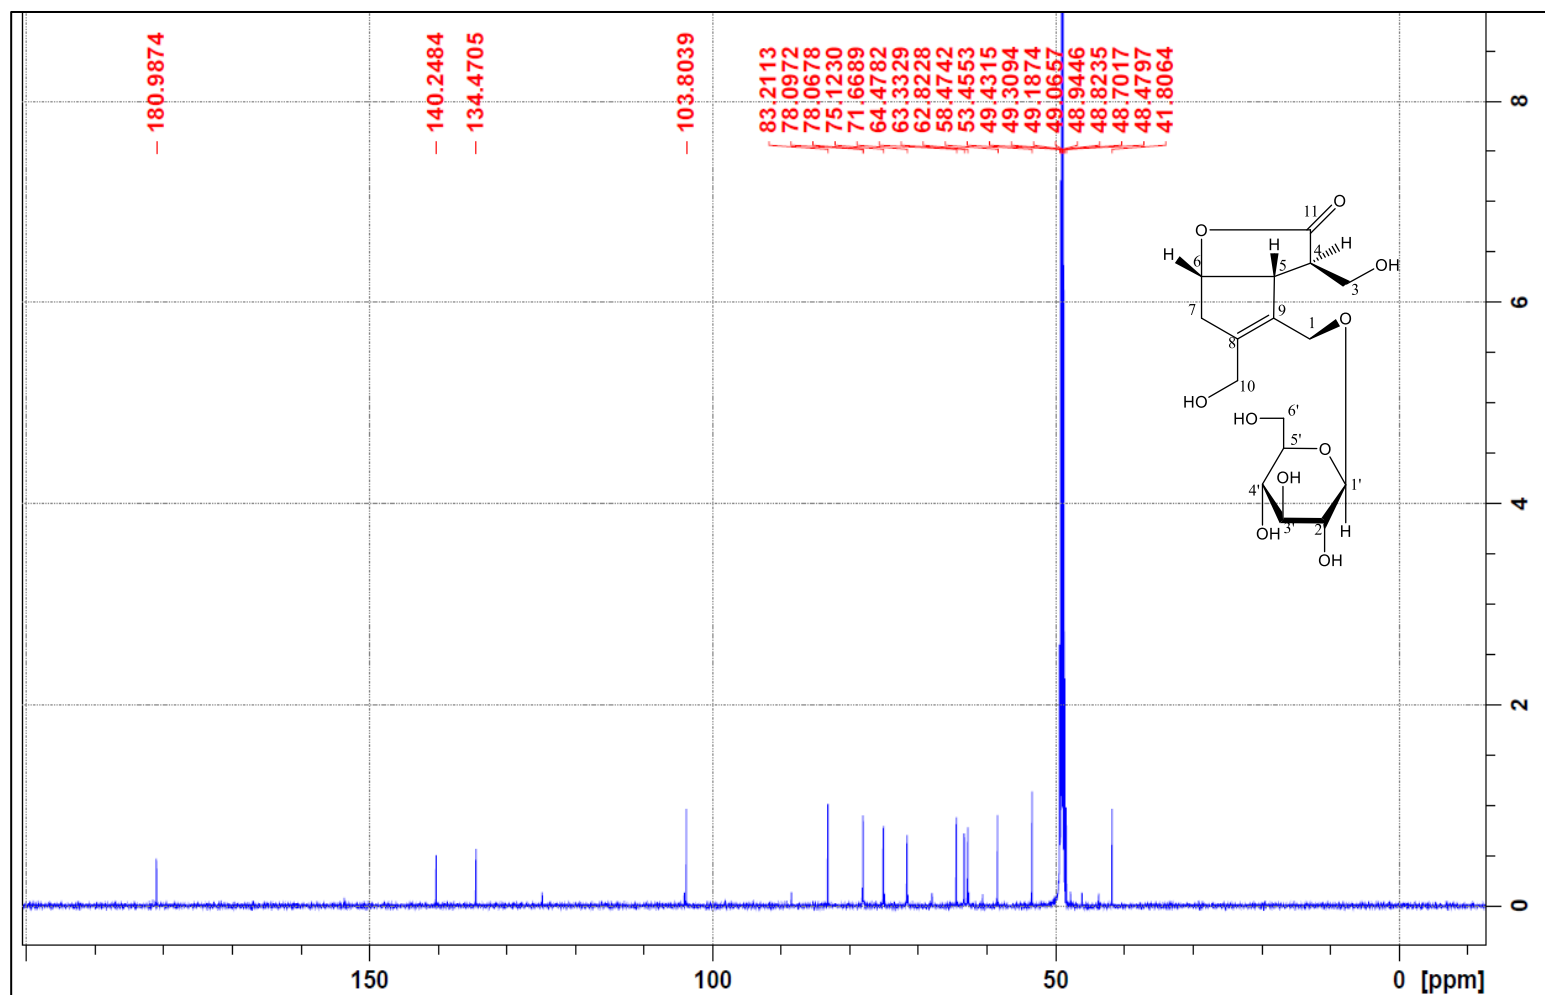

**Figure 4.** The DEPT-135 NMR spectrum of **1** in CD<sub>3</sub>OD, 175 MHz.

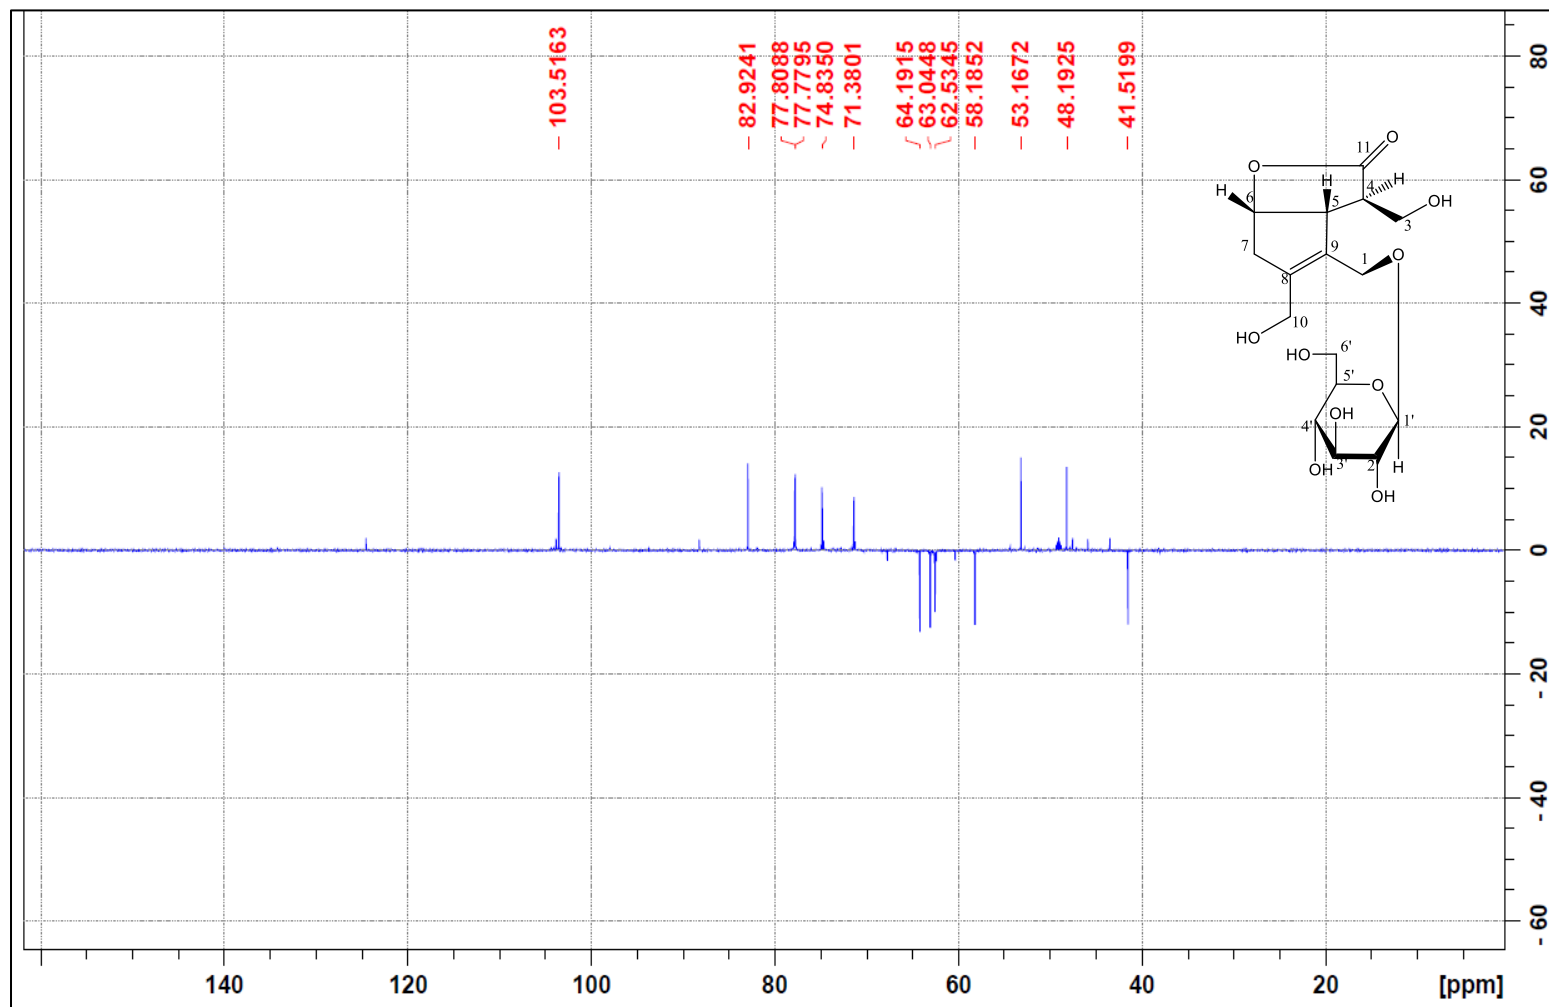

**Figure 5.** The COSY spectrum of **1** in CD<sub>3</sub>OD, 700 MHz.

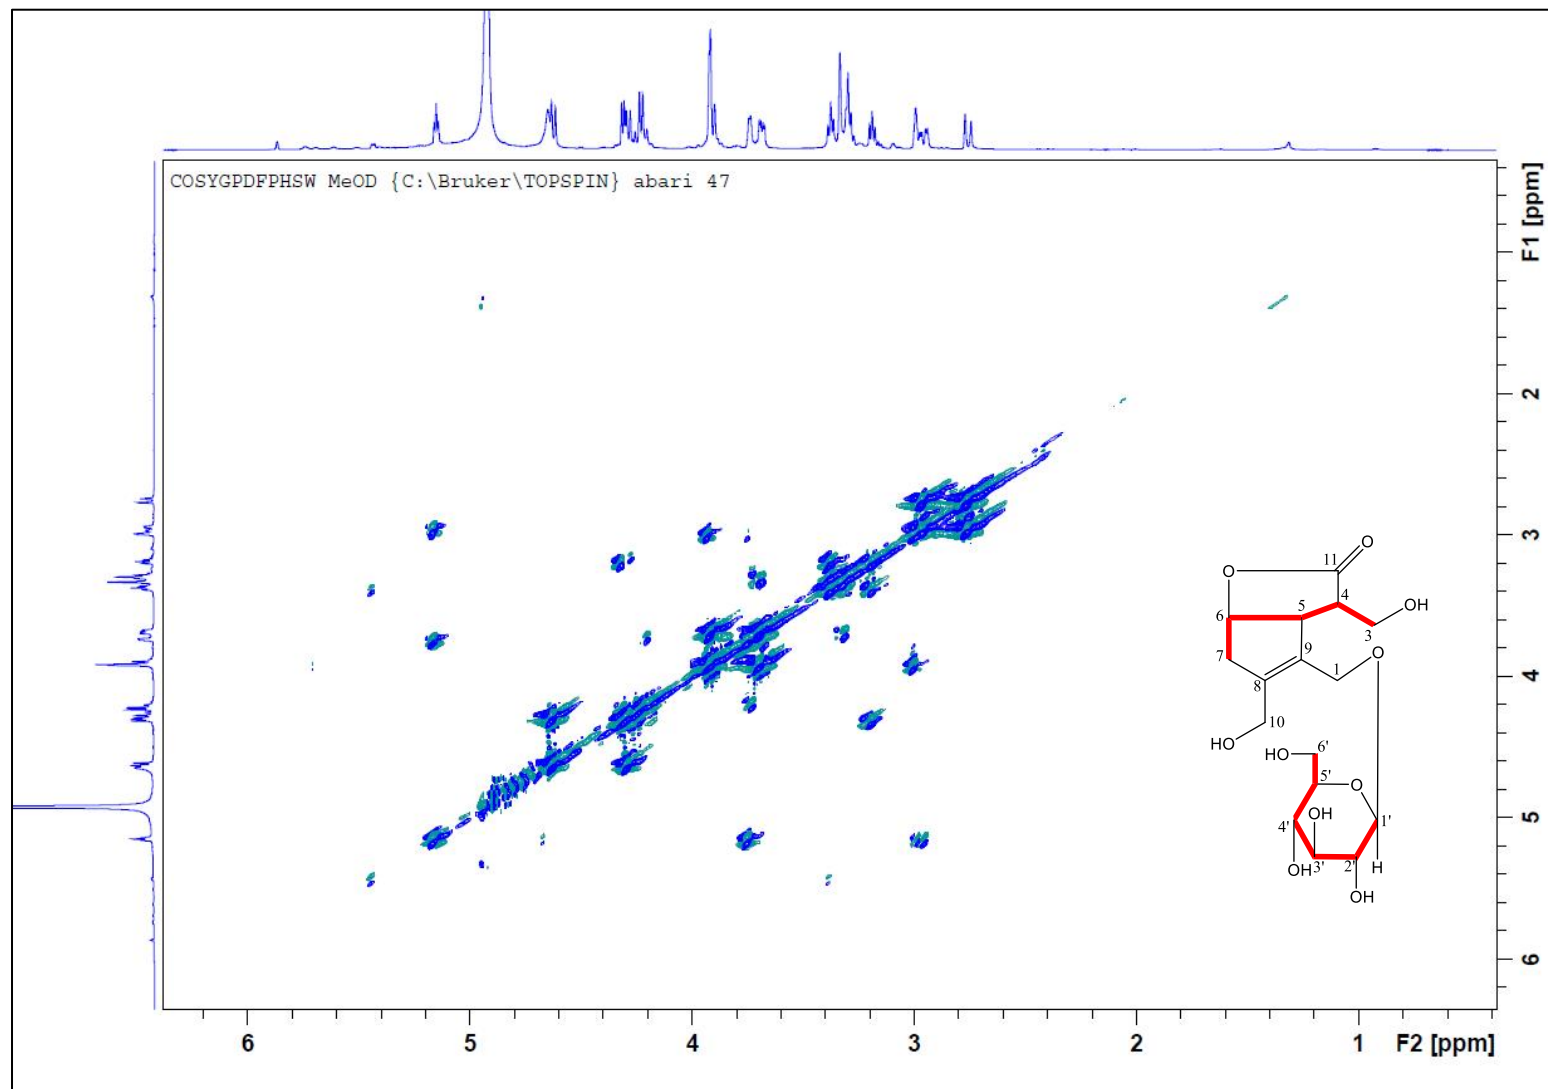



**Figure 6.** The HSQC spectrum of **1** in CD<sub>3</sub>OD, 700 MHz.

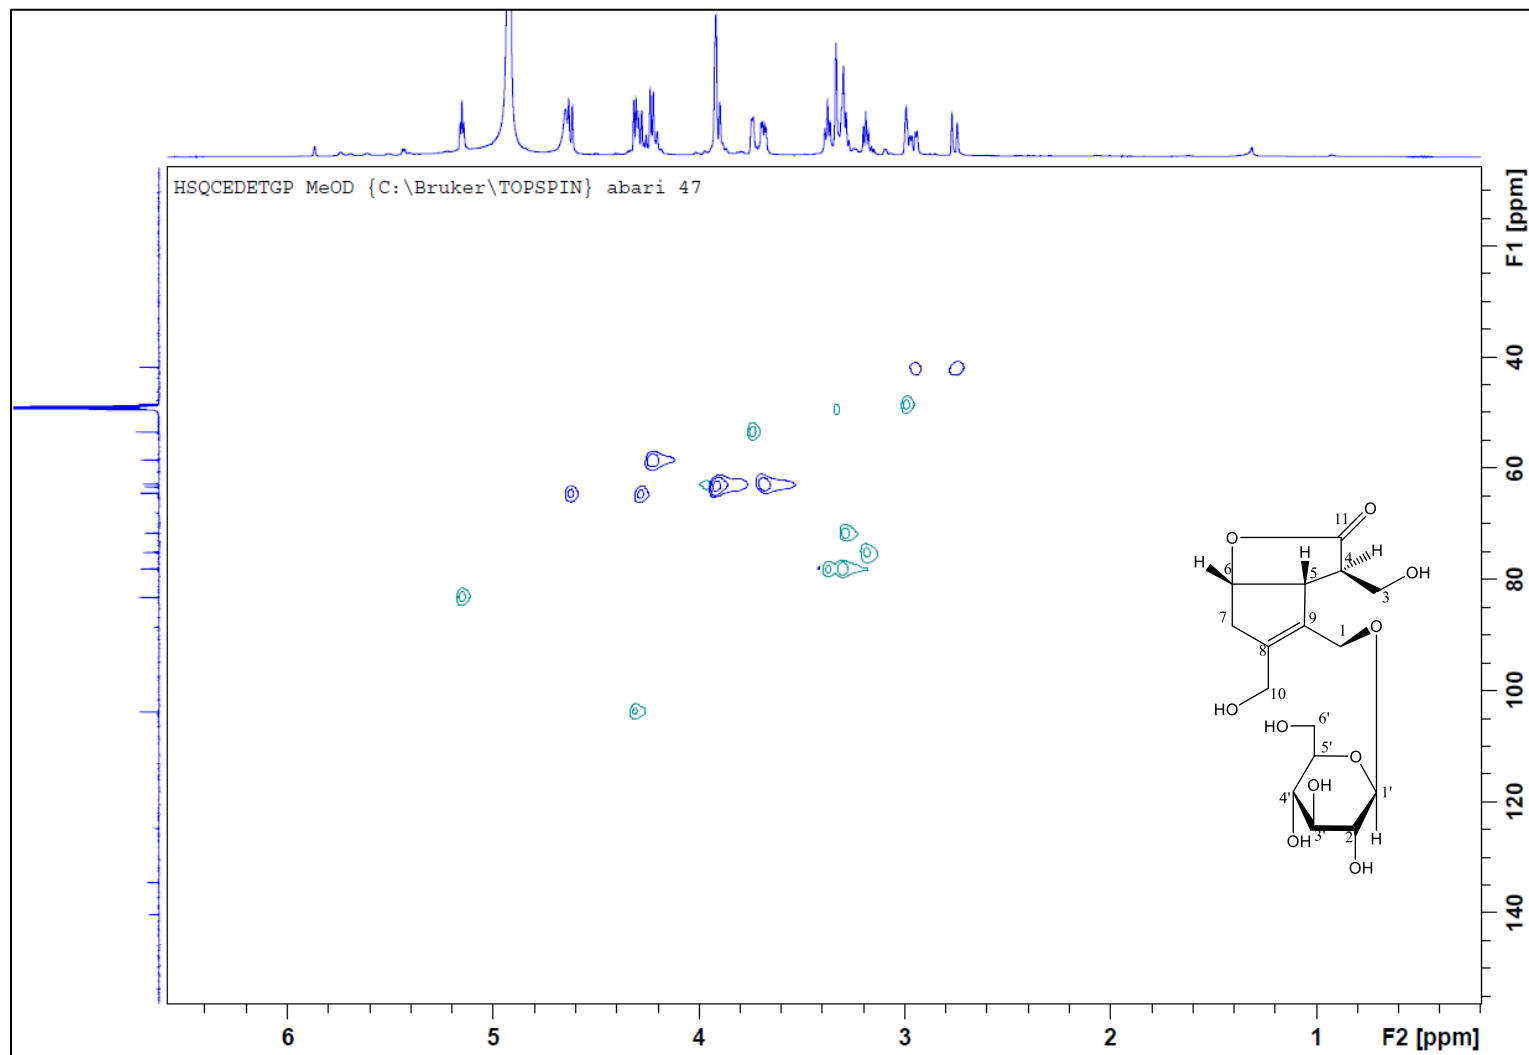

**Figure 7.** The HMBC spectrum of **1** in CD<sub>3</sub>OD, 700 MHz.

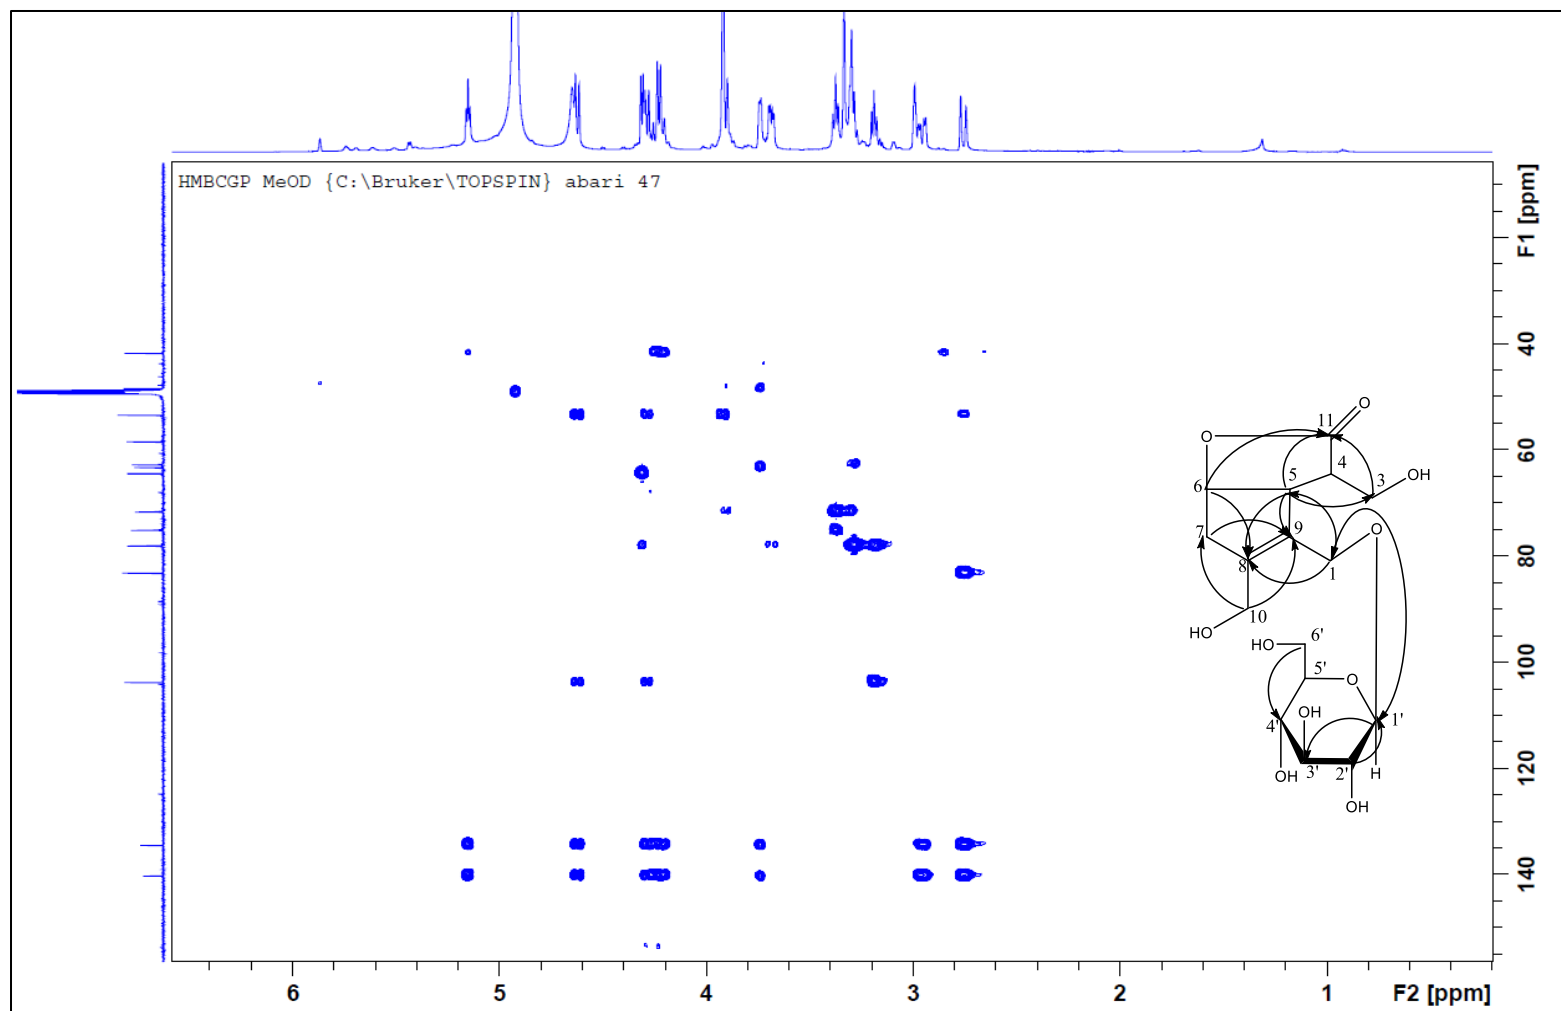

**Figure 8.** The NOESY spectrum of **1** in CD<sub>3</sub>OD, 500 MHz.

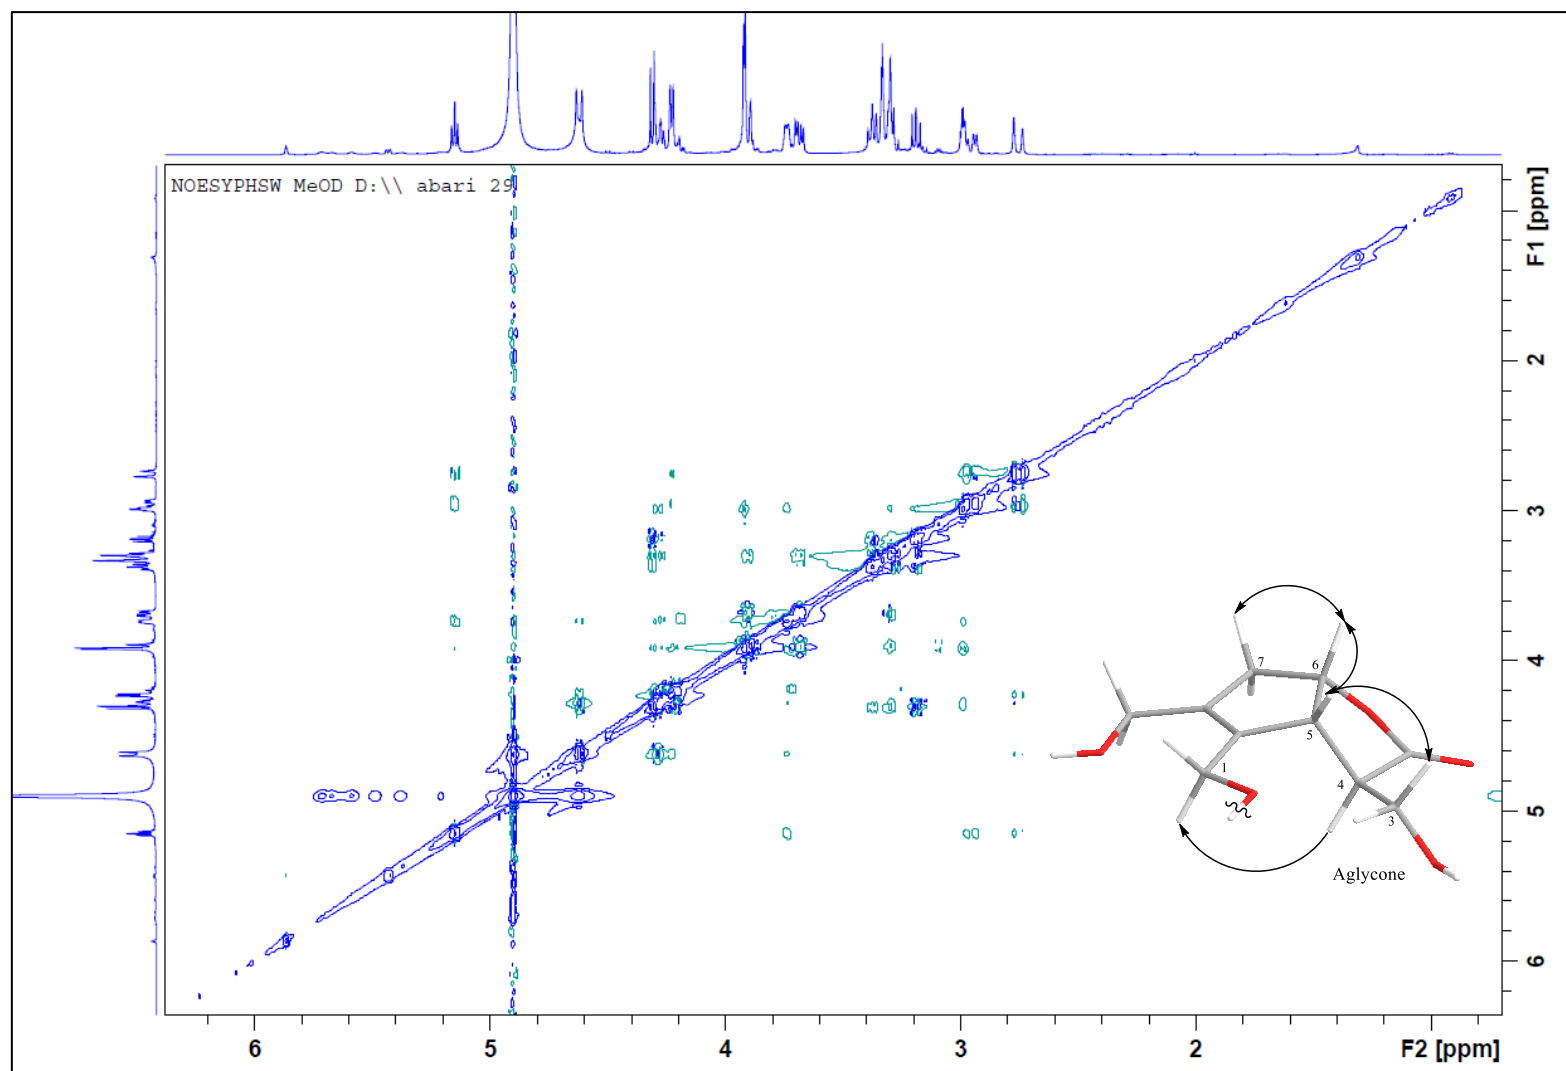

Figure 9. The IR spectrum of 1.

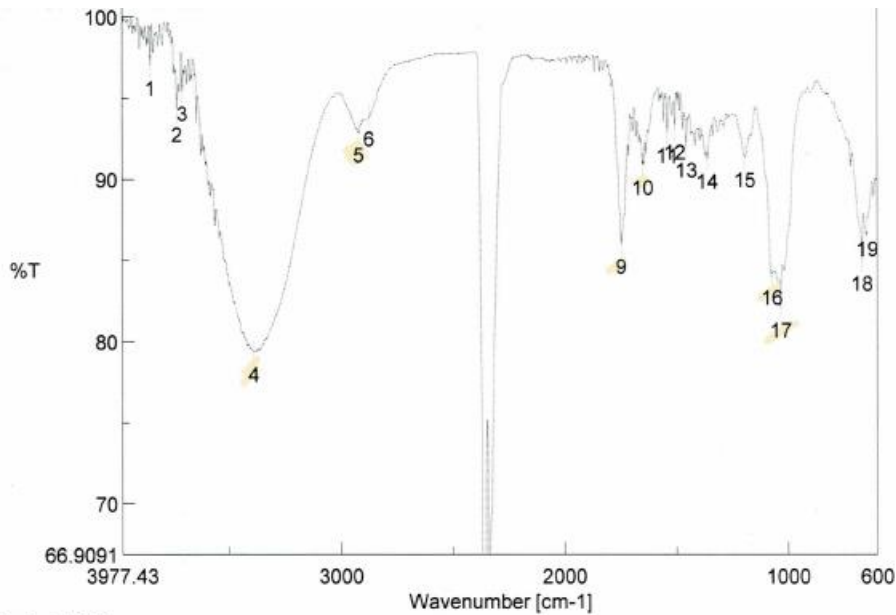

[コメント情報]

試料名  
コメント  
測定者  
所属  
会社 HU

[データ情報]

作成日時 2018/06/28 17:32  
データタイプ 等間隔データ  
横軸 Wavenumber [cm-1]  
縦軸 %T  
スタート 599.753 cm-1  
エンド 7800.65 cm-1  
データ間隔 0.964233 cm-1  
データ数 7469

[測定情報]

機種名 FT/IR-4600typeA  
シリアル番号 D015461786  
測定日時 2018/06/28 17:32  
光源 標準光源  
検出器 TGS  
積算回数 10  
分解 4 cm-1  
ゼロフィリング On  
アボダイゼーション Cosine  
ゲイン Auto (2)  
アパーチャー Auto (7.1 mm)  
スキャンスピード Auto (2 mm/sec)  
フィルタ Auto (30000 Hz)

[ピーク検出結果]

| No. | 位置      | 強度      | No. | 位置      | 強度      |
|-----|---------|---------|-----|---------|---------|
| 1   | 3852.11 | 97.0169 | 2   | 3733.51 | 94.1194 |
| 3   | 3709.41 | 95.432  | 4   | 3390.24 | 79.3491 |
| 5   | 2921.63 | 92.8682 | 6   | 2874.38 | 93.86   |
| 7   | 2362.37 | 55.5519 | 8   | 2340.19 | 66.0959 |
| 9   | 1748.16 | 86.0003 | 10  | 1651.73 | 90.8962 |
| 11  | 1540.85 | 92.8568 | 12  | 1507.1  | 93.0612 |
| 13  | 1455.99 | 91.9631 | 14  | 1362.46 | 91.2923 |

[ピーク検出結果]

| No. | 位置      | 強度      | No. | 位置      | 強度      |
|-----|---------|---------|-----|---------|---------|
| 15  | 1194.69 | 91.3814 | 16  | 1072.23 | 84.0904 |
| 17  | 1032.69 | 82.0846 | 18  | 669.178 | 84.9505 |
| 19  | 646.036 | 87.0834 |     |         |         |

**Figure 10.** The HRESIMS spectrum of **2**.

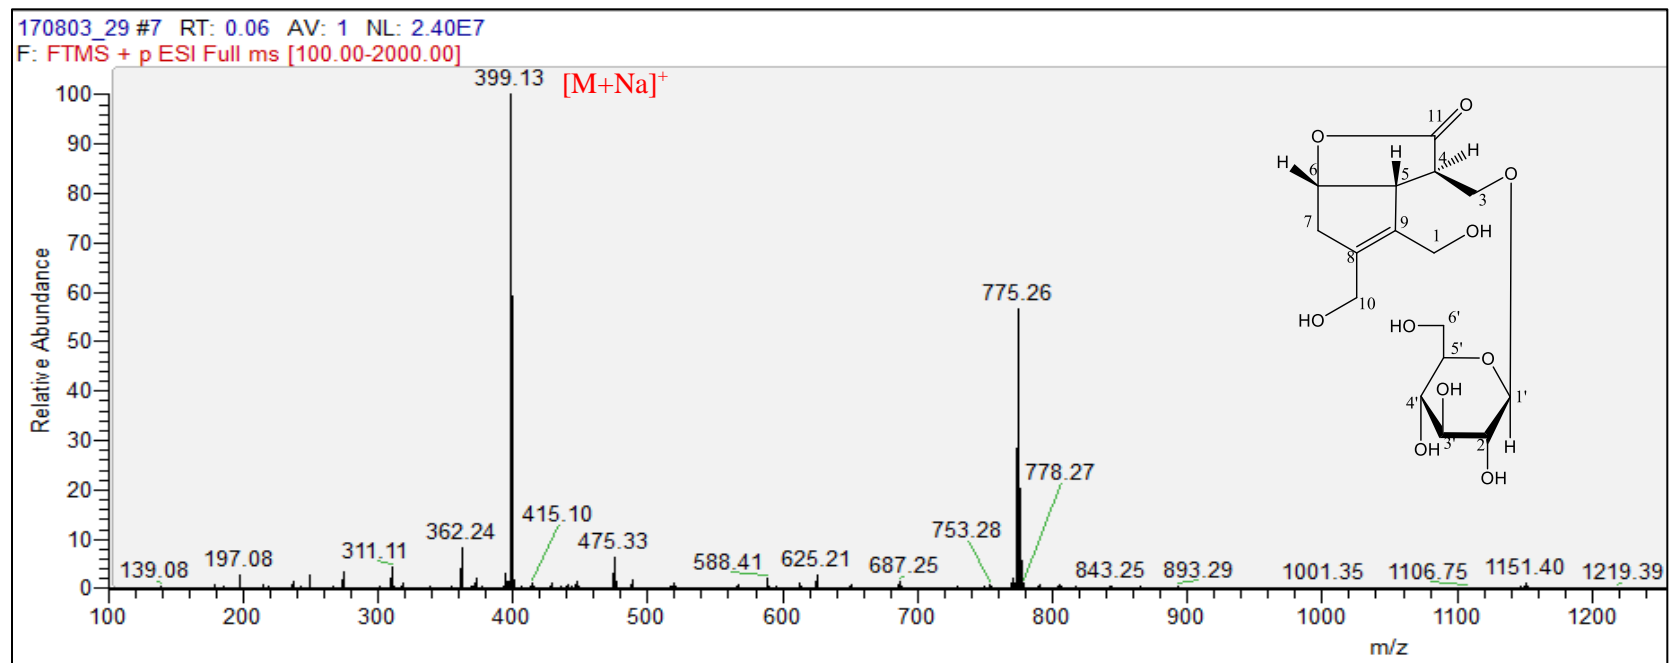

Elemental composition search on mass 399.13

m/z= 394.13-404.13

| m/z      | Theo. Mass | Delta (mmu) | RDB equiv. | Composition                                        |
|----------|------------|-------------|------------|----------------------------------------------------|
| 399.1265 | 399.1262   | 0.29        | 4.5        | C <sub>16</sub> H <sub>24</sub> O <sub>10</sub> Na |

Figure 11. The  $^1\text{H}$  NMR spectrum of **2** in  $\text{CD}_3\text{OD}$ , 500 MHz.

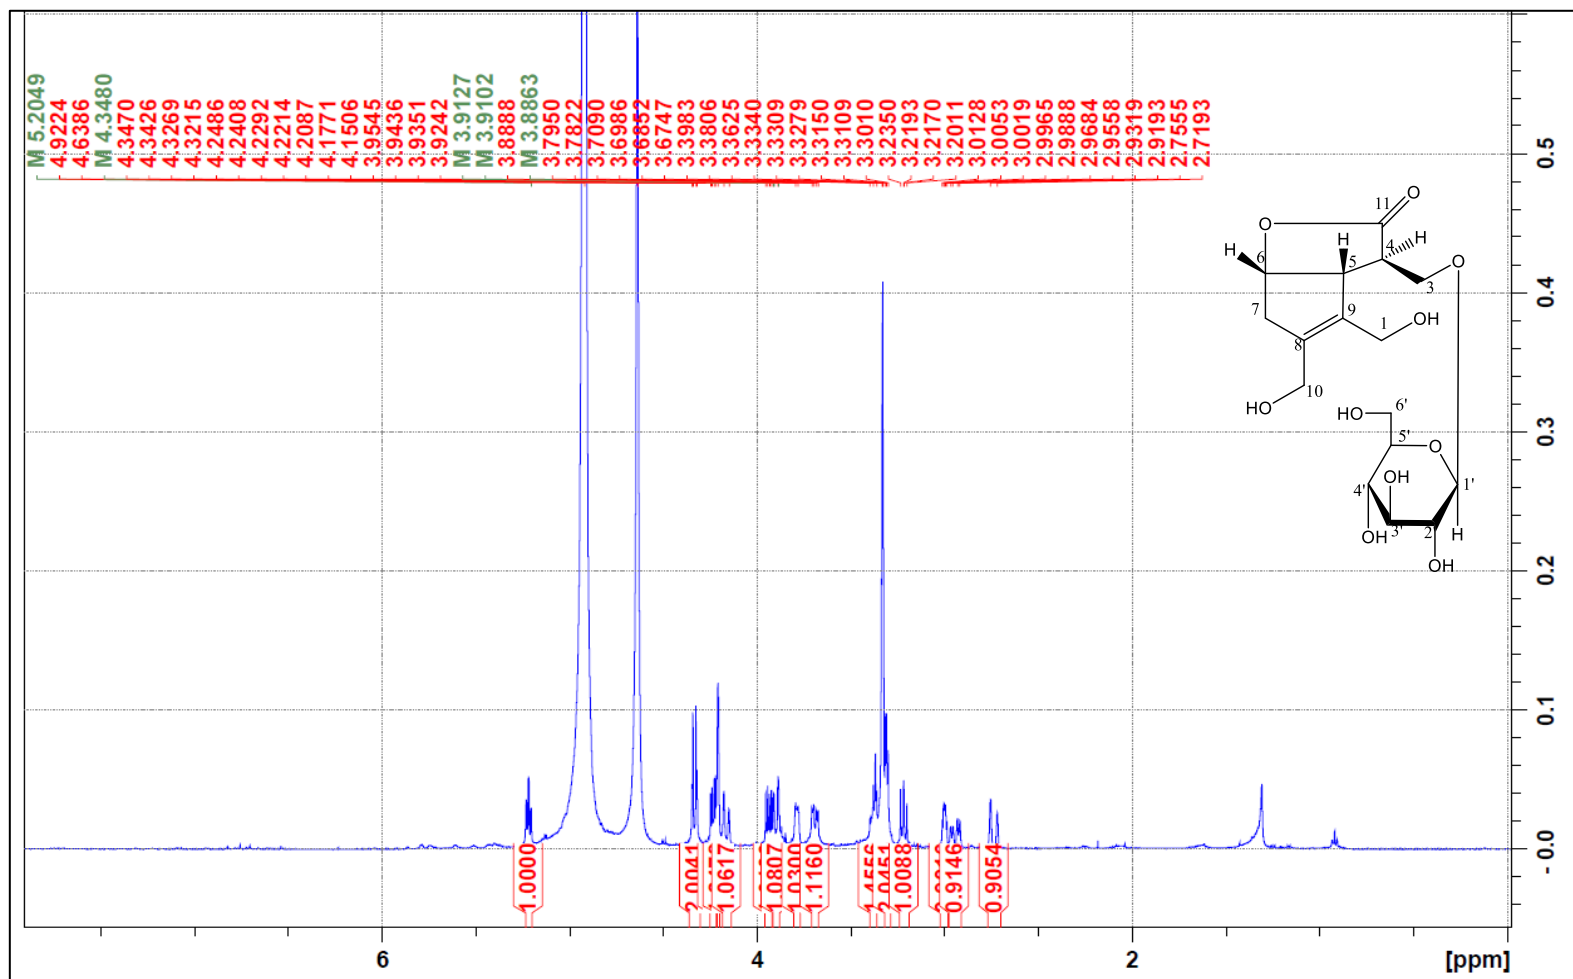

**Figure 12.** The  $^{13}\text{C}$  NMR spectrum of **2** in  $\text{CD}_3\text{OD}$ , 175 MHz.

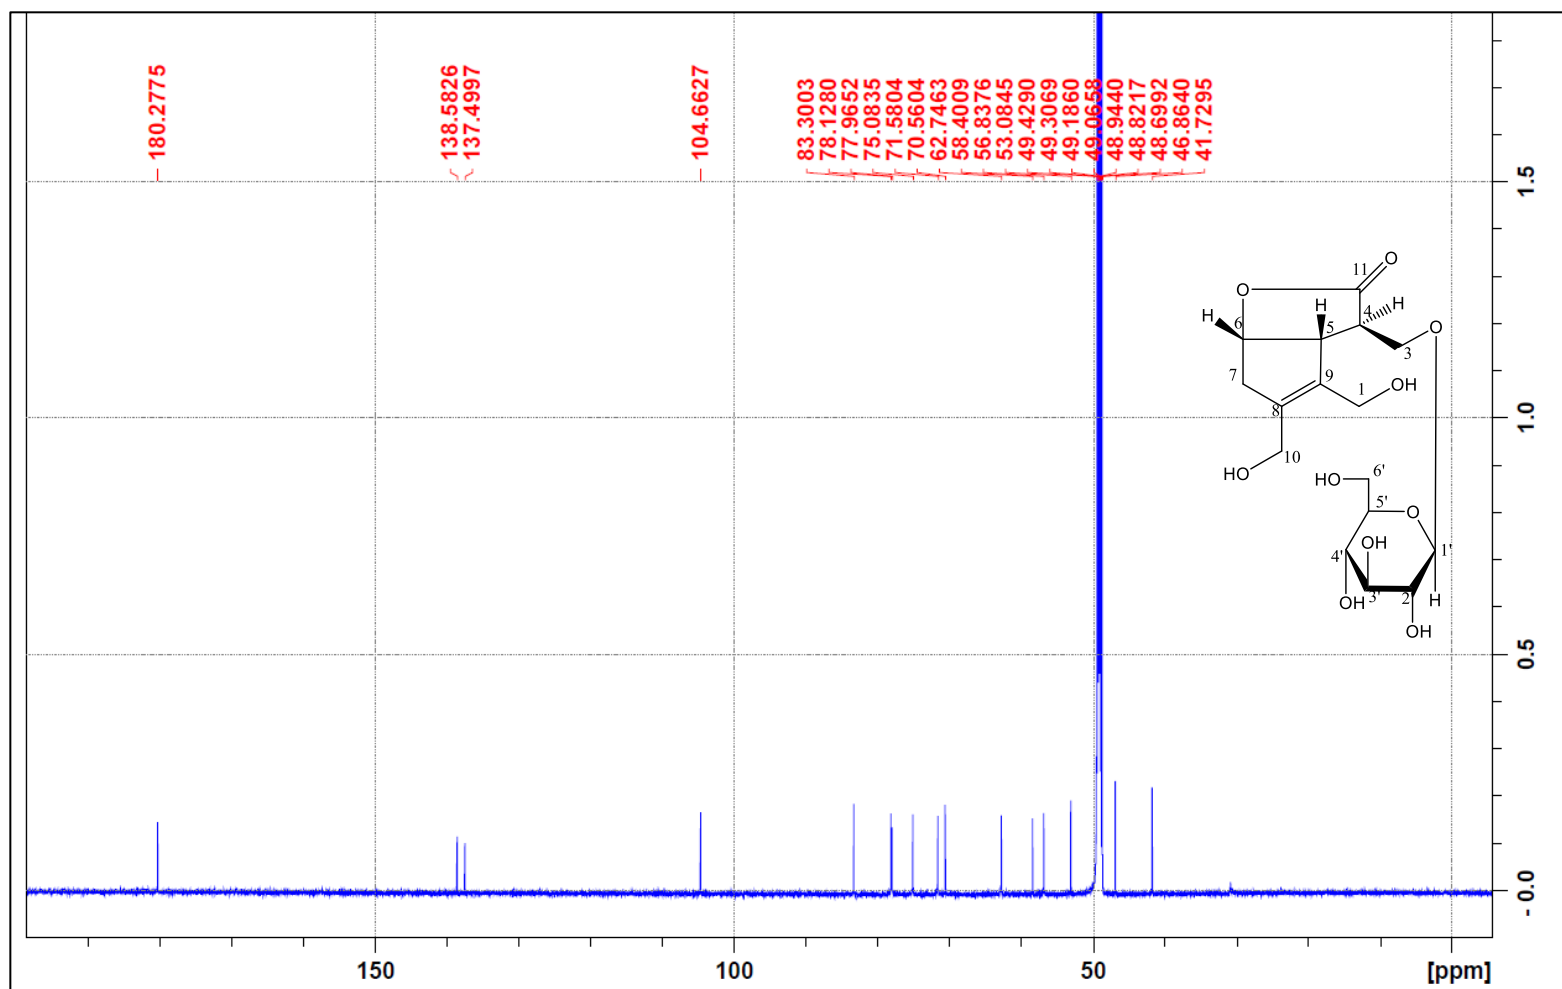

**Figure 13.** The DEPT-135 NMR spectrum of **2** in CD<sub>3</sub>OD, 175 MHz.

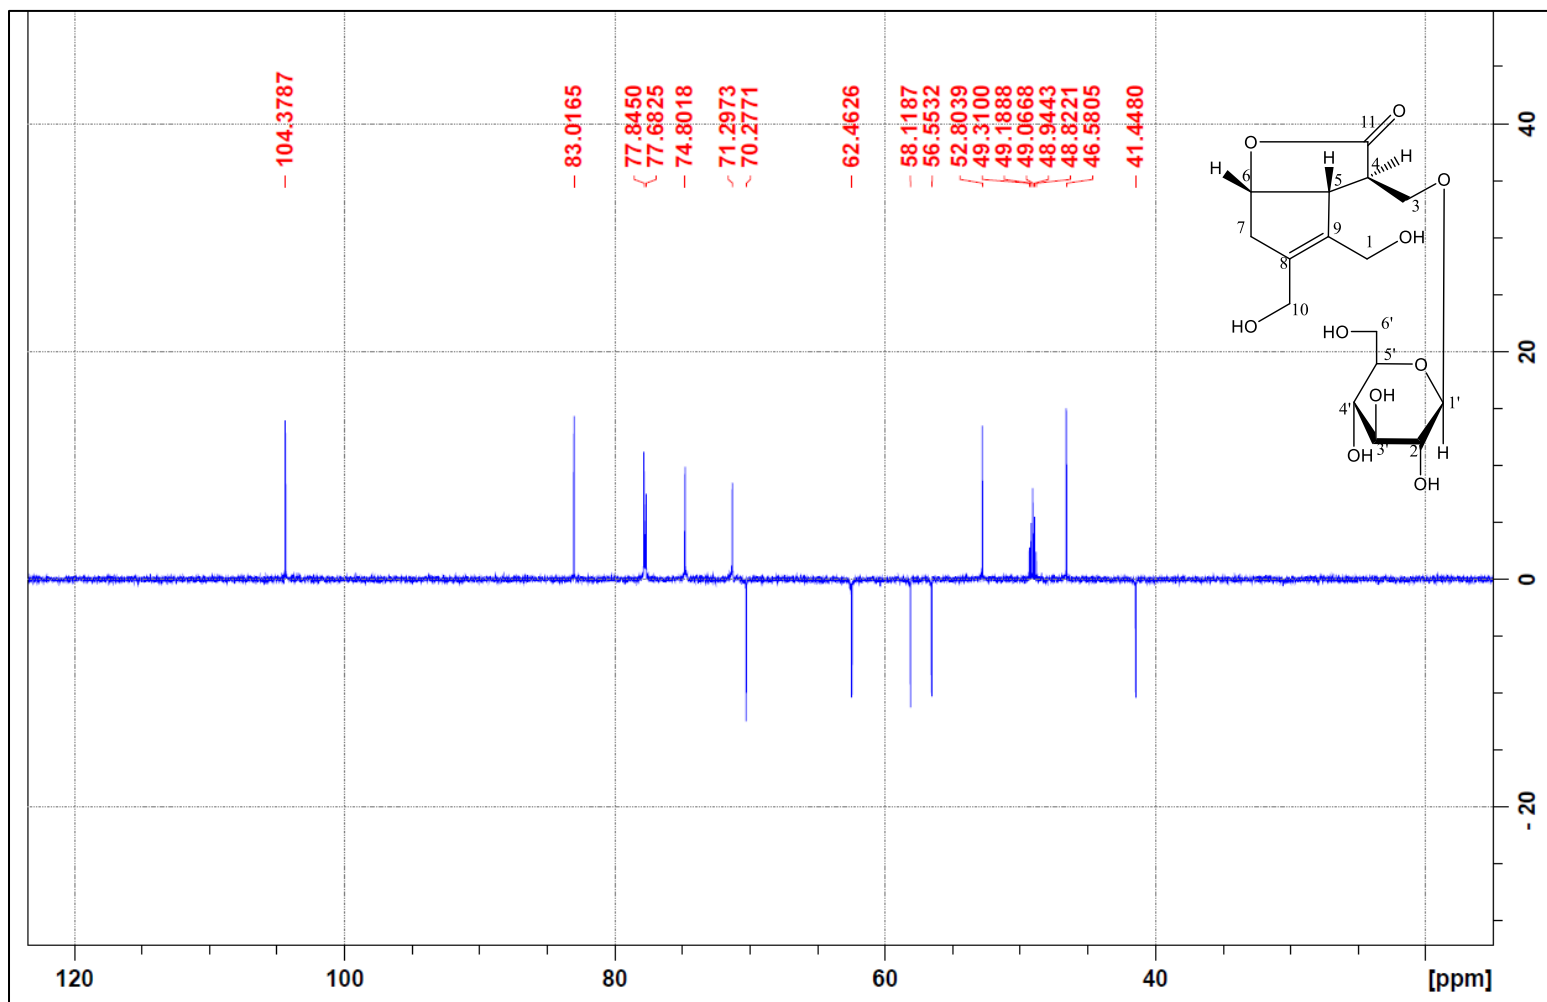



**Figure 14.** The COSY spectrum of **2** in CD<sub>3</sub>OD, 700 MHz.

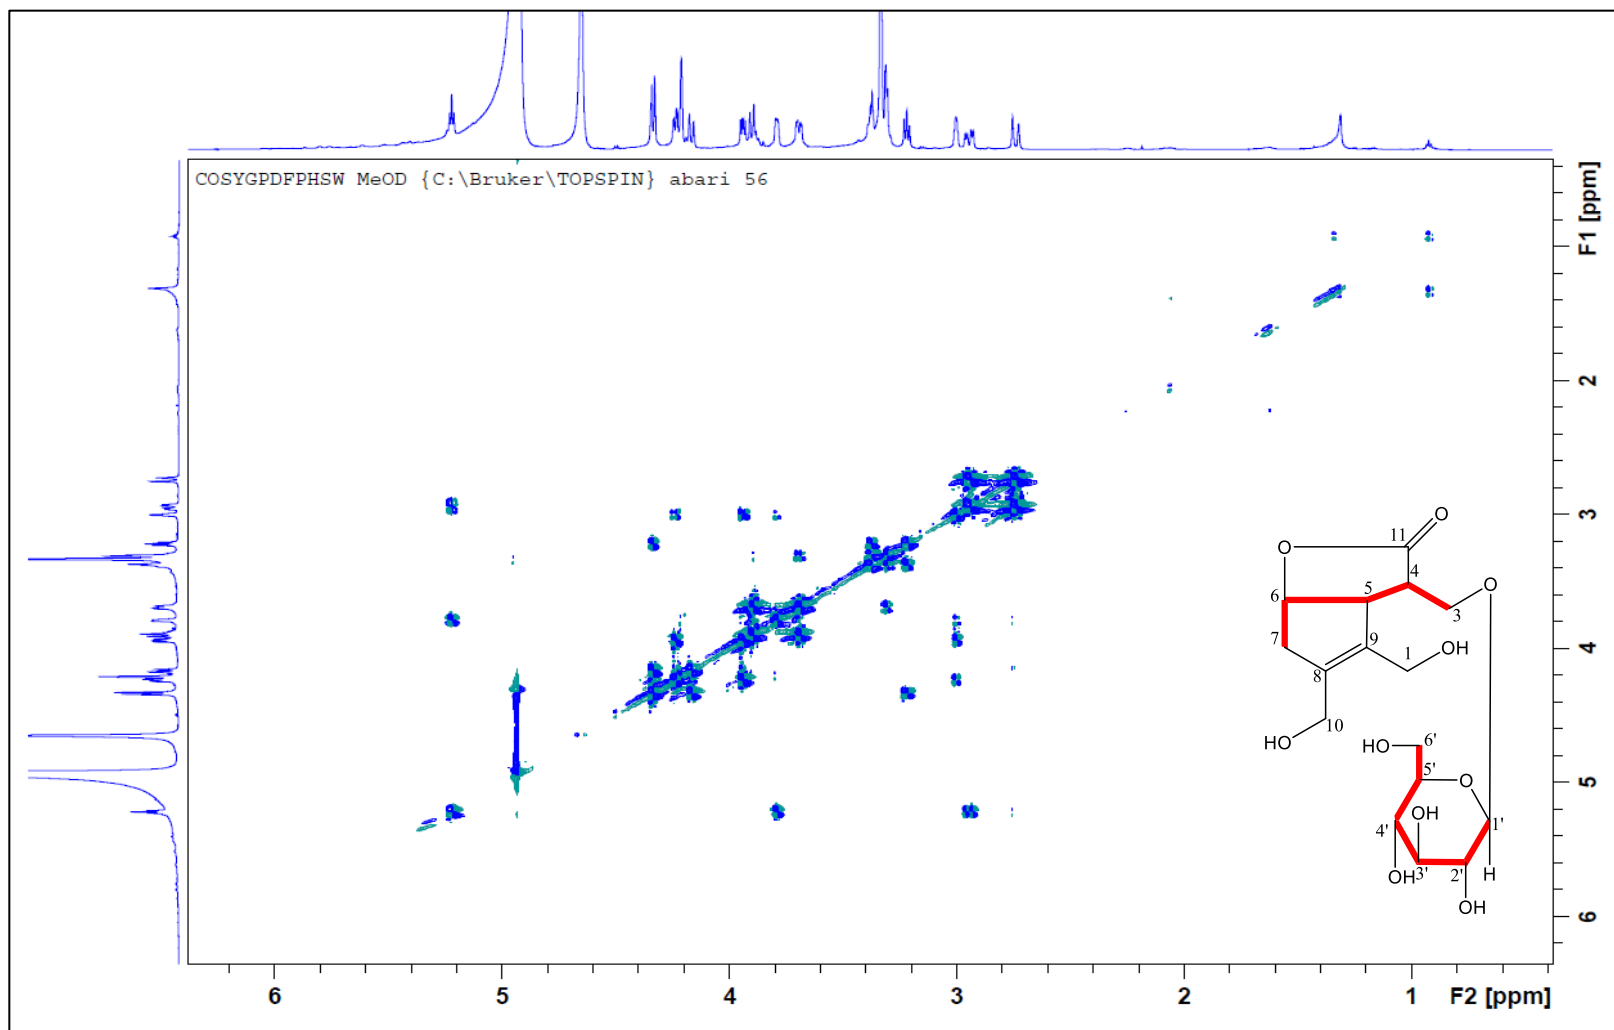

**Figure 15.** The HSQC spectrum of **2** in CD<sub>3</sub>OD, 700 MHz.

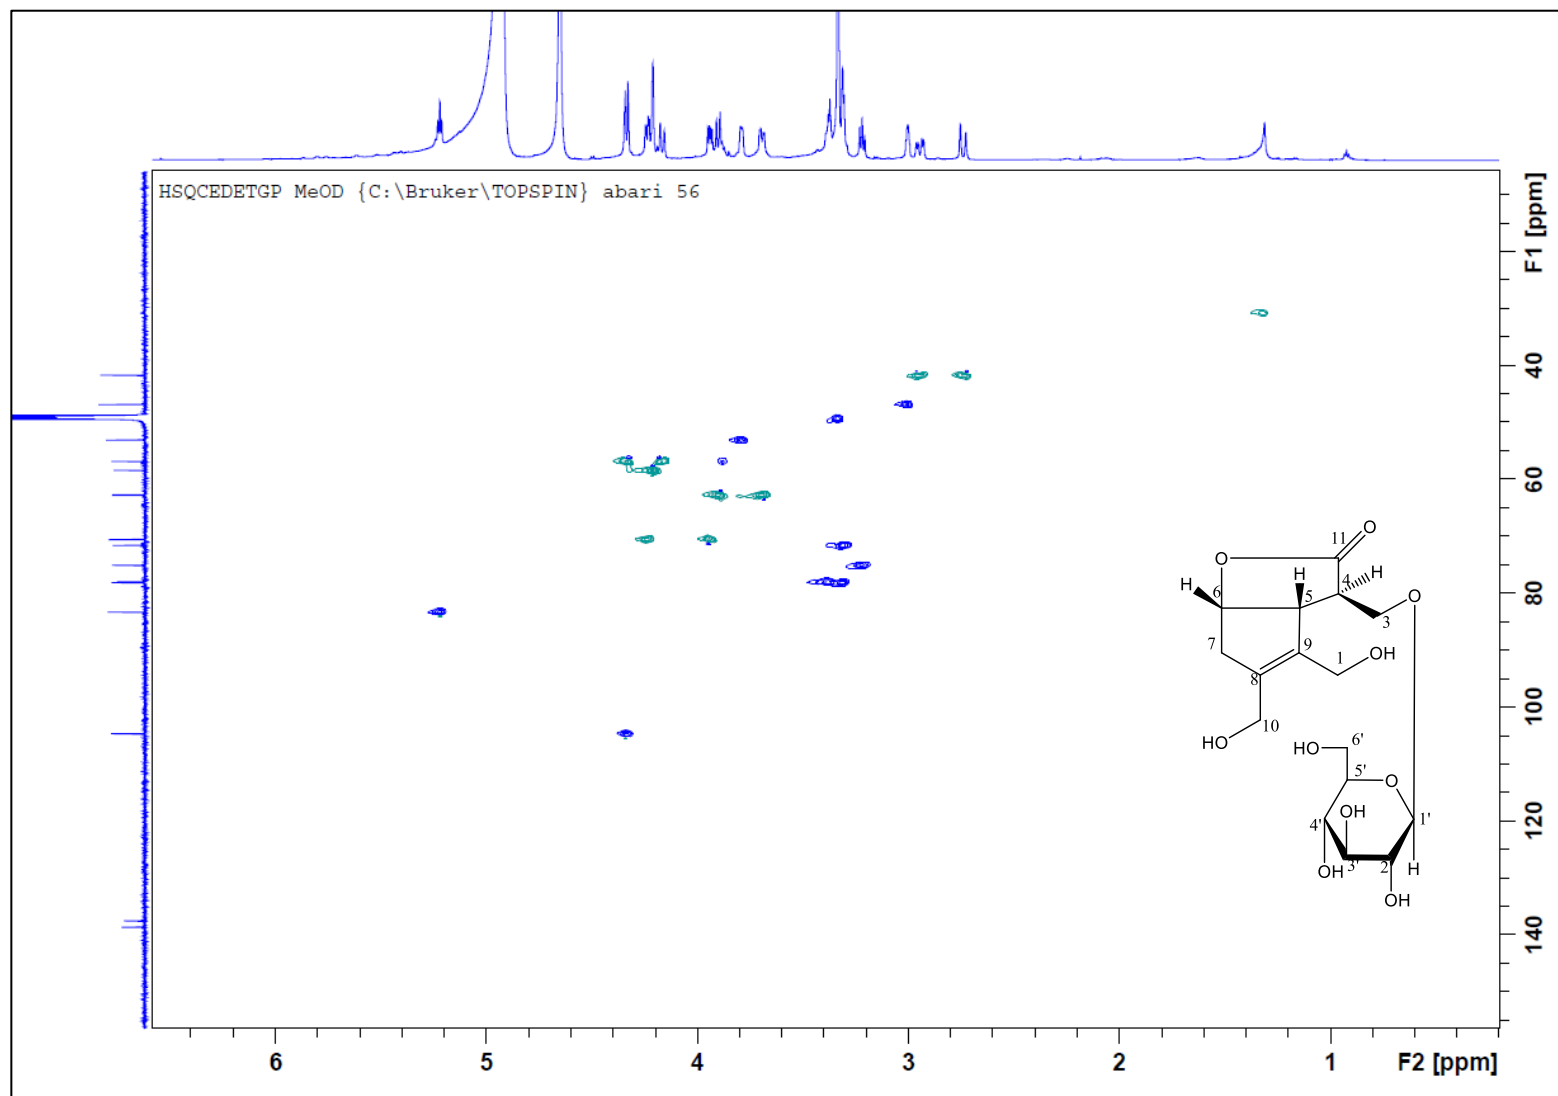

**Figure 16.** The HMBC spectrum of **2** in CD<sub>3</sub>OD, 700 MHz.

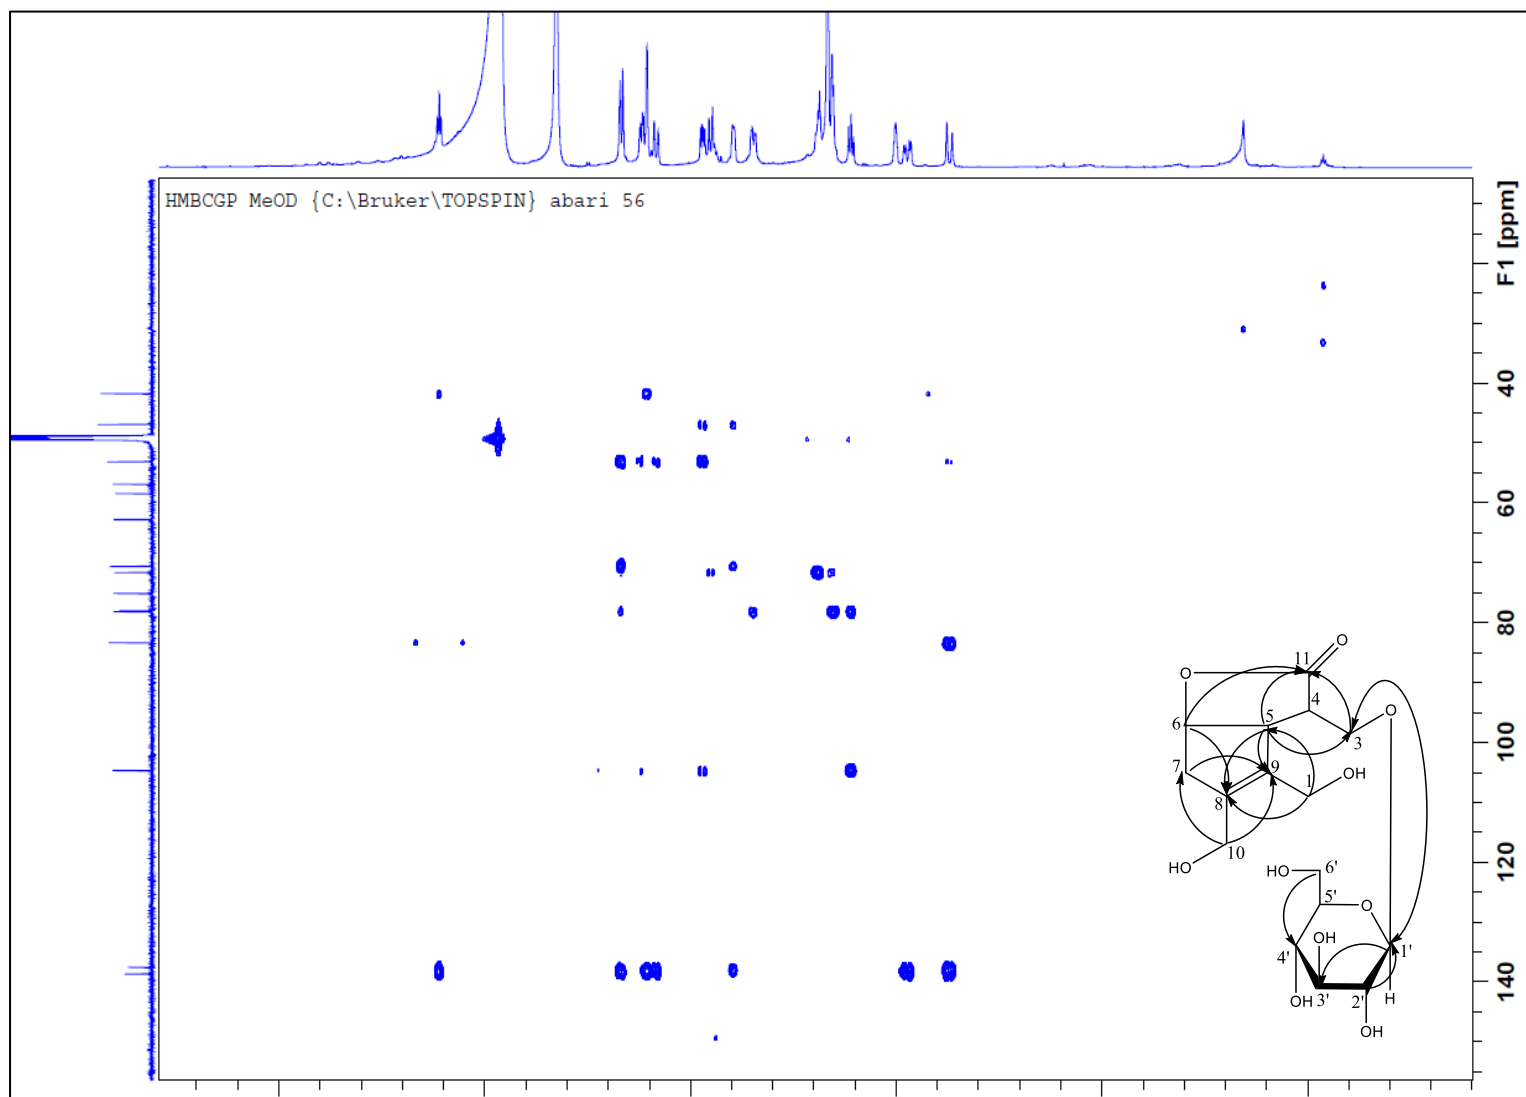

**Figure 17.** The NOESY spectrum of **2** in CD<sub>3</sub>OD, 500 MHz.

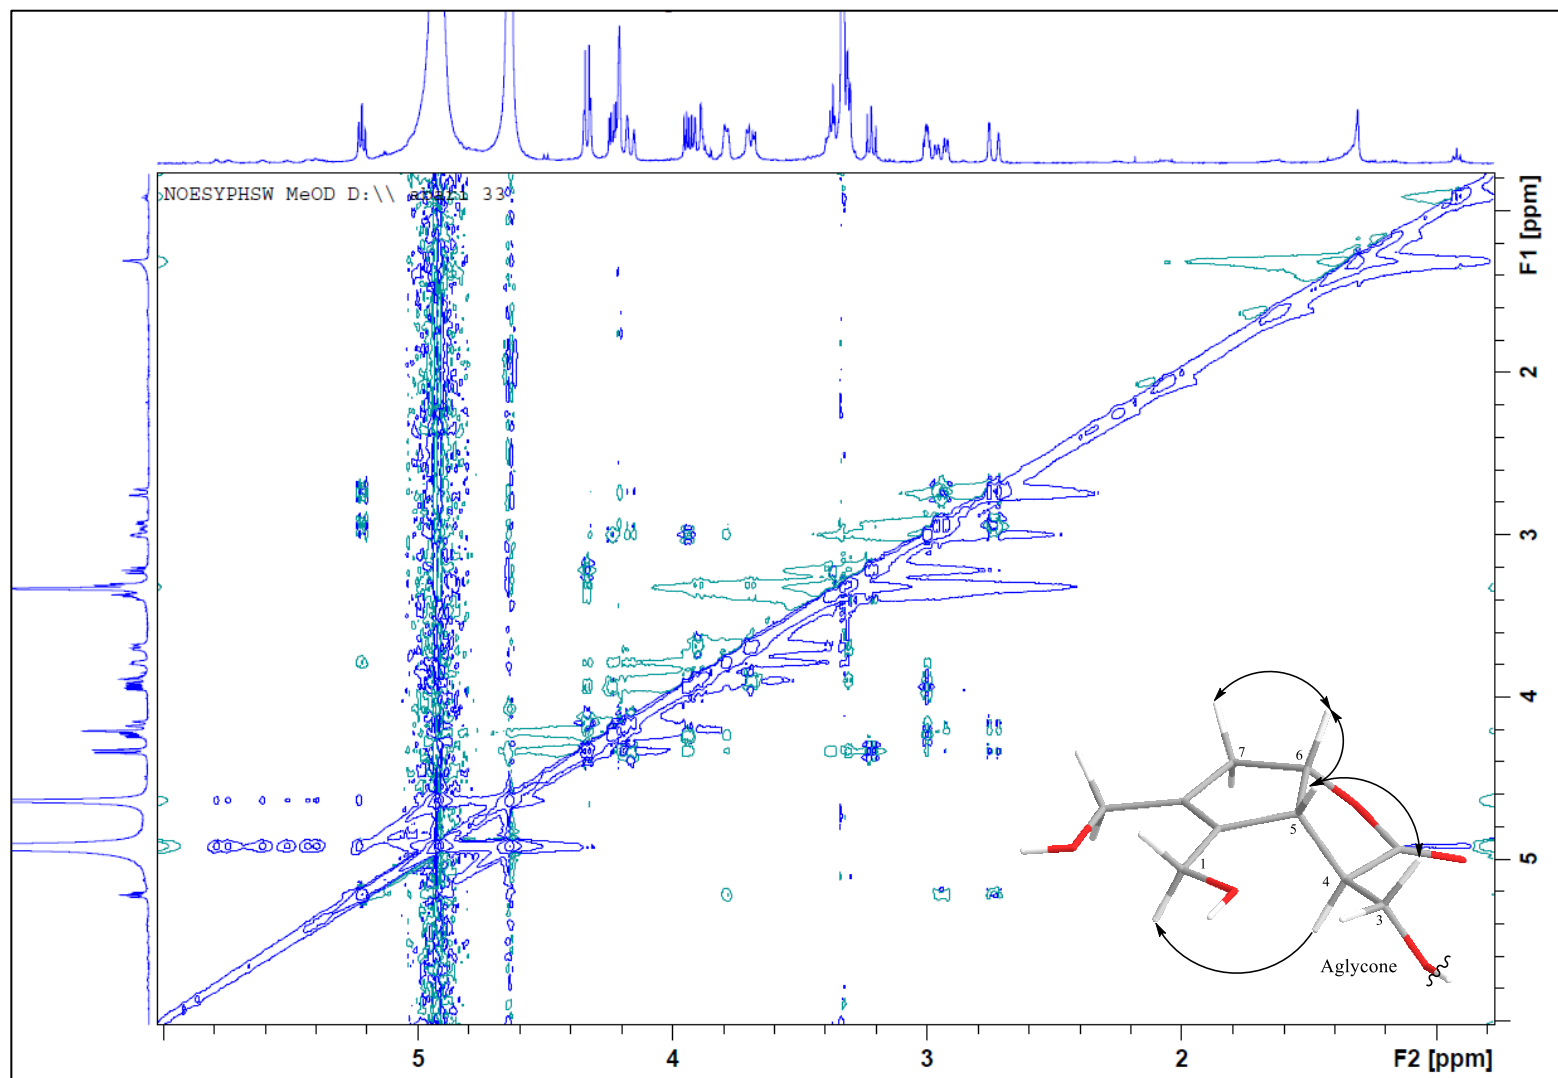

Figure 18. The IR spectrum of 2.

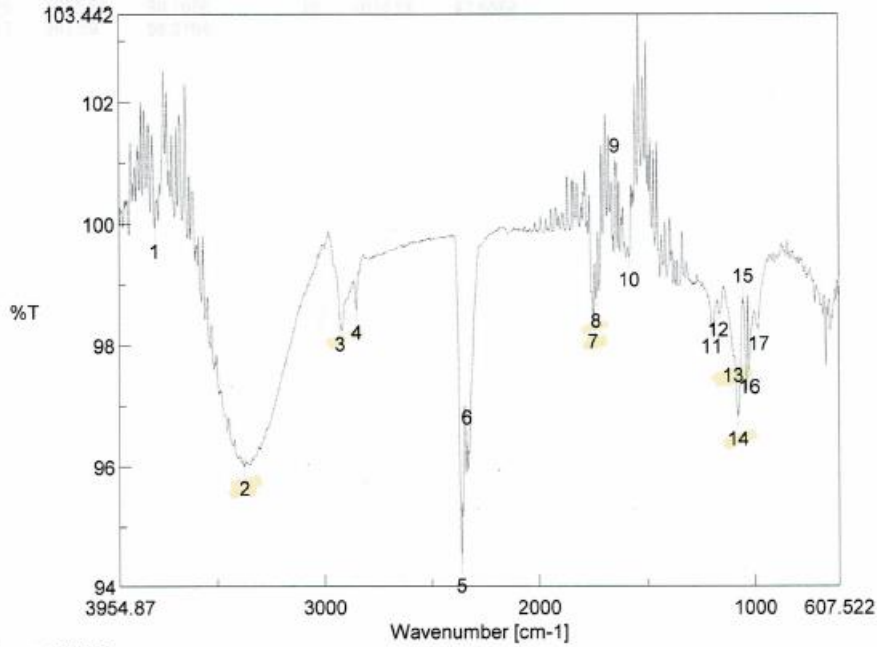

[コメント情報]

試料名  
コメント  
測定者  
所属  
会社 HU

[データ情報]

作成日時 2018/07/04 16:22  
データタイプ 等間隔データ  
横軸 Wavenumber [cm-1]  
縦軸 %T  
スタート 599.753 cm-1  
エンド 7800.65 cm-1  
データ間隔 0.964233 cm-1  
データ数 7469

[測定情報]

機種名 FT/IR-4600typeA  
シリアル番号 D015461786  
測定日時 2018/07/04 16:22  
光源 標準光源  
検出器 TGS  
積算回数 10  
分解 4 cm-1  
ゼロフィリング On  
アポダイゼーション Cosine  
ゲイン Auto (2)  
アパーチャー Auto (7.1 mm)  
スキャンスピード Auto (2 mm/sec)  
フィルタ Auto (30000 Hz)

[ピーク検出結果]

| No. | 位置      | 強度      | No. | 位置      | 強度      |
|-----|---------|---------|-----|---------|---------|
| 1   | 3790.4  | 99.915  | 2   | 3372.89 | 95.9975 |
| 3   | 2927.41 | 98.3722 | 4   | 2850.27 | 98.5695 |
| 5   | 2363.34 | 94.3719 | 6   | 2337.3  | 96.4296 |
| 7   | 1754.9  | 98.4149 | 8   | 1742.37 | 98.7569 |
| 9   | 1653.66 | 100.904 | 10  | 1586.16 | 99.4451 |
| 11  | 1202.4  | 98.3342 | 12  | 1171.54 | 98.6088 |
| 13  | 1102.12 | 97.8548 | 14  | 1078.98 | 96.8161 |

[ピーク検出結果]

| No. | 位置      | 強度      | No. | 位置      | 強度      |
|-----|---------|---------|-----|---------|---------|
| 15  | 1055.84 | 98.7686 | 16  | 1024.98 | 97.6688 |
| 17  | 981.59  | 98.3764 |     |         |         |

**Figure 19.** The HRESIMS spectrum of **3**.

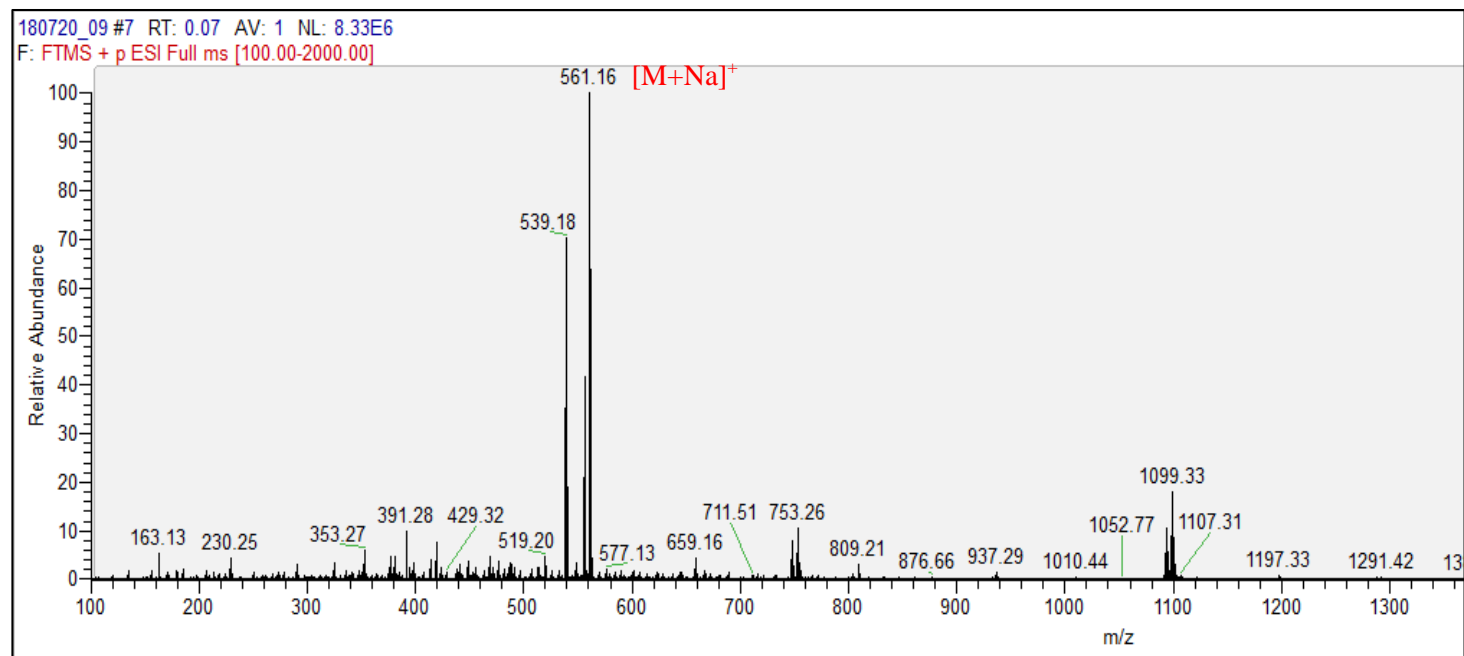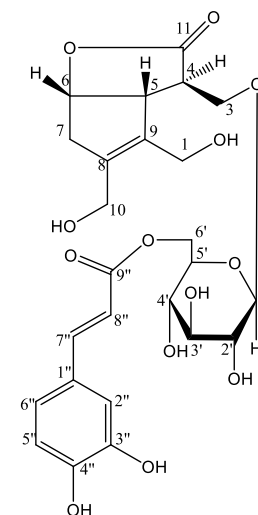

Elemental composition search on mass 561.16

m/z= 556.16-566.16

| m/z      | Theo. Mass | Delta (mmu) | RDB equiv. | Composition                                        |
|----------|------------|-------------|------------|----------------------------------------------------|
| 561.1572 | 561.1579   | -0.63       | 10.5       | C <sub>25</sub> H <sub>30</sub> O <sub>13</sub> Na |

**Figure 20.** The  $^1\text{H}$  NMR spectrum of **3** in  $\text{CD}_3\text{OD}$ , 500 MHz.

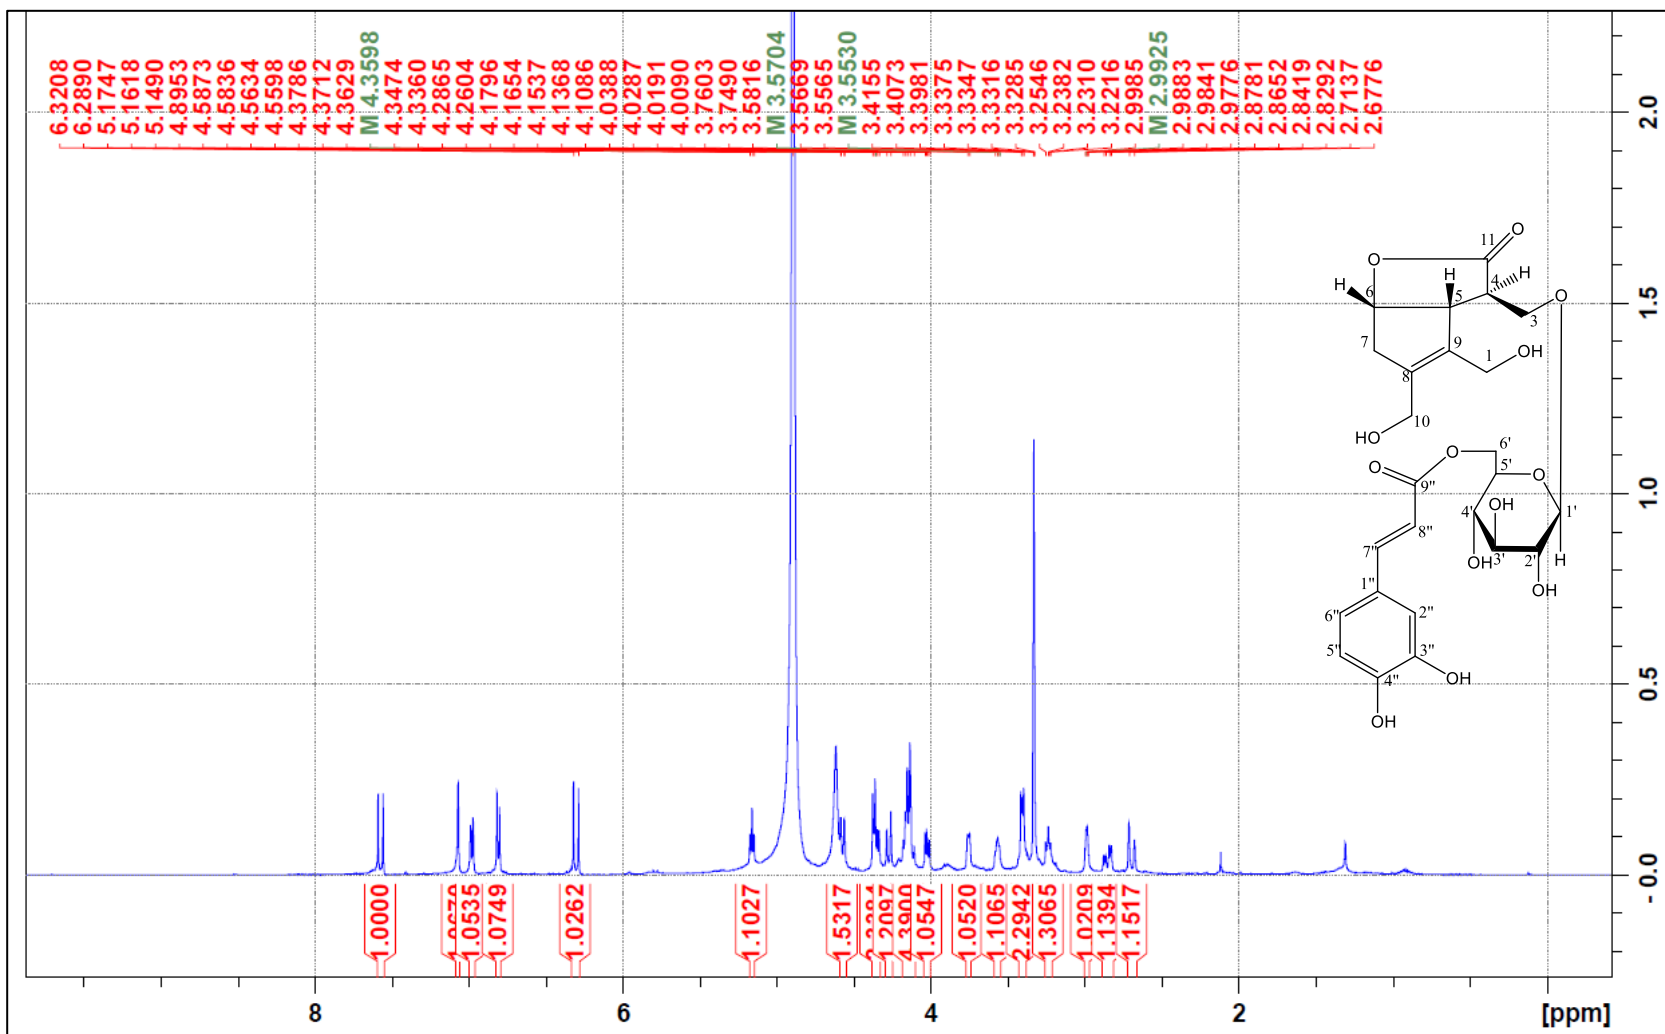

**Figure 21.** The  $^{13}\text{C}$  NMR spectrum of **3** in  $\text{CD}_3\text{OD}$ , 175 MHz.

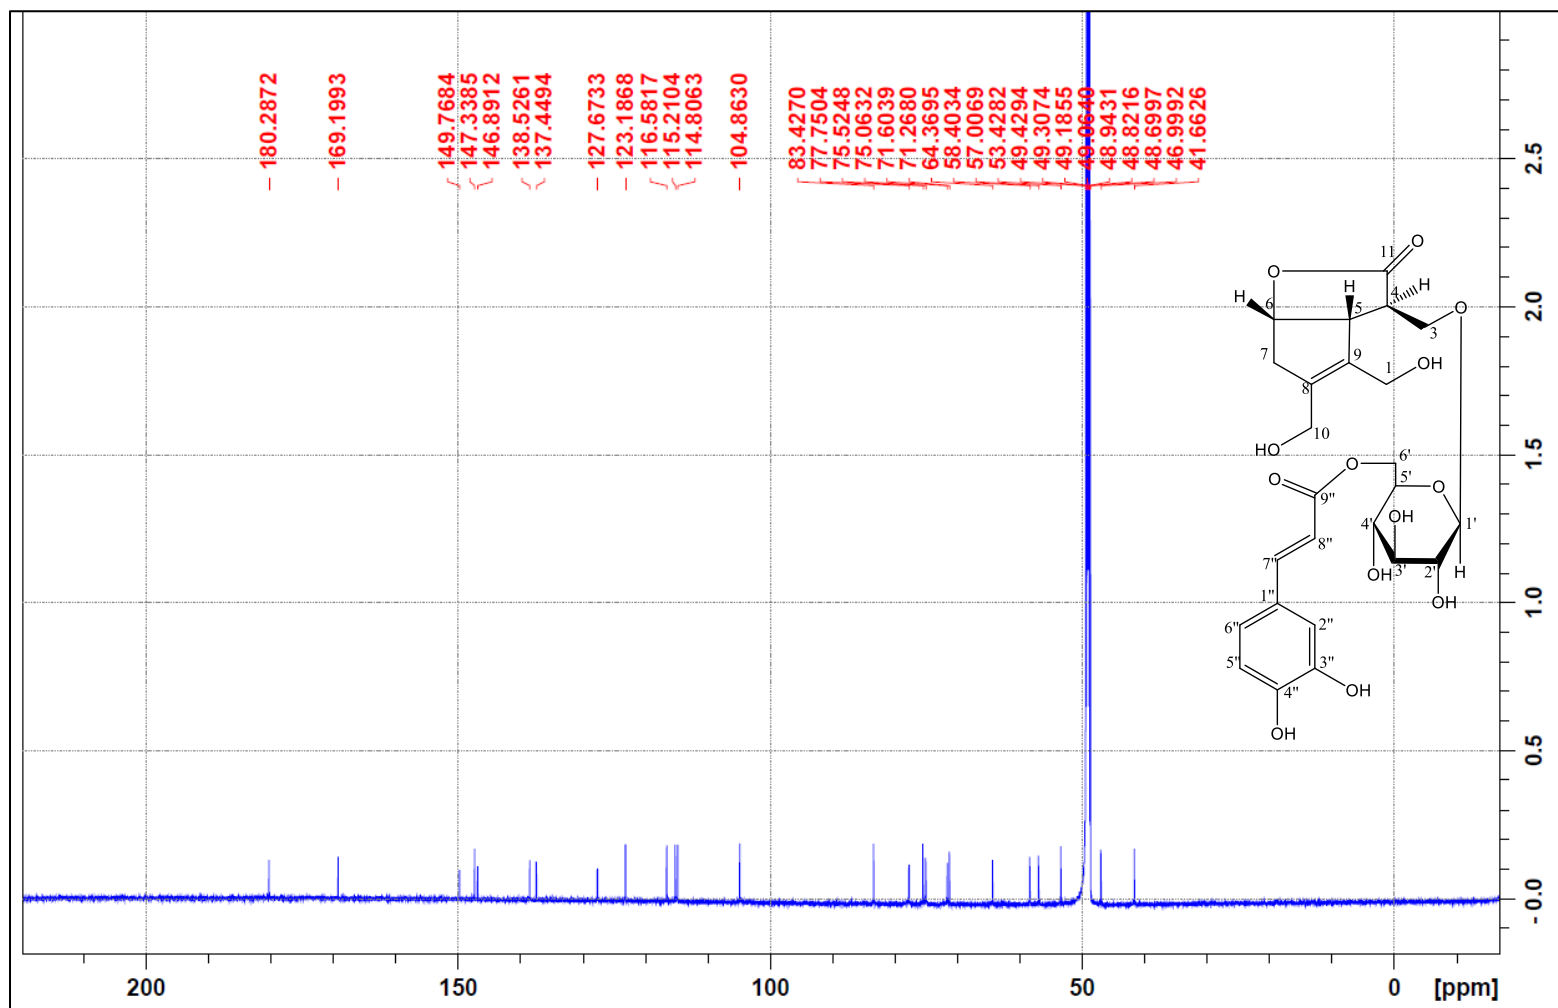



**Figure 22.** The DEPT-135 NMR spectrum of **3** in CD<sub>3</sub>OD, 175 MHz.

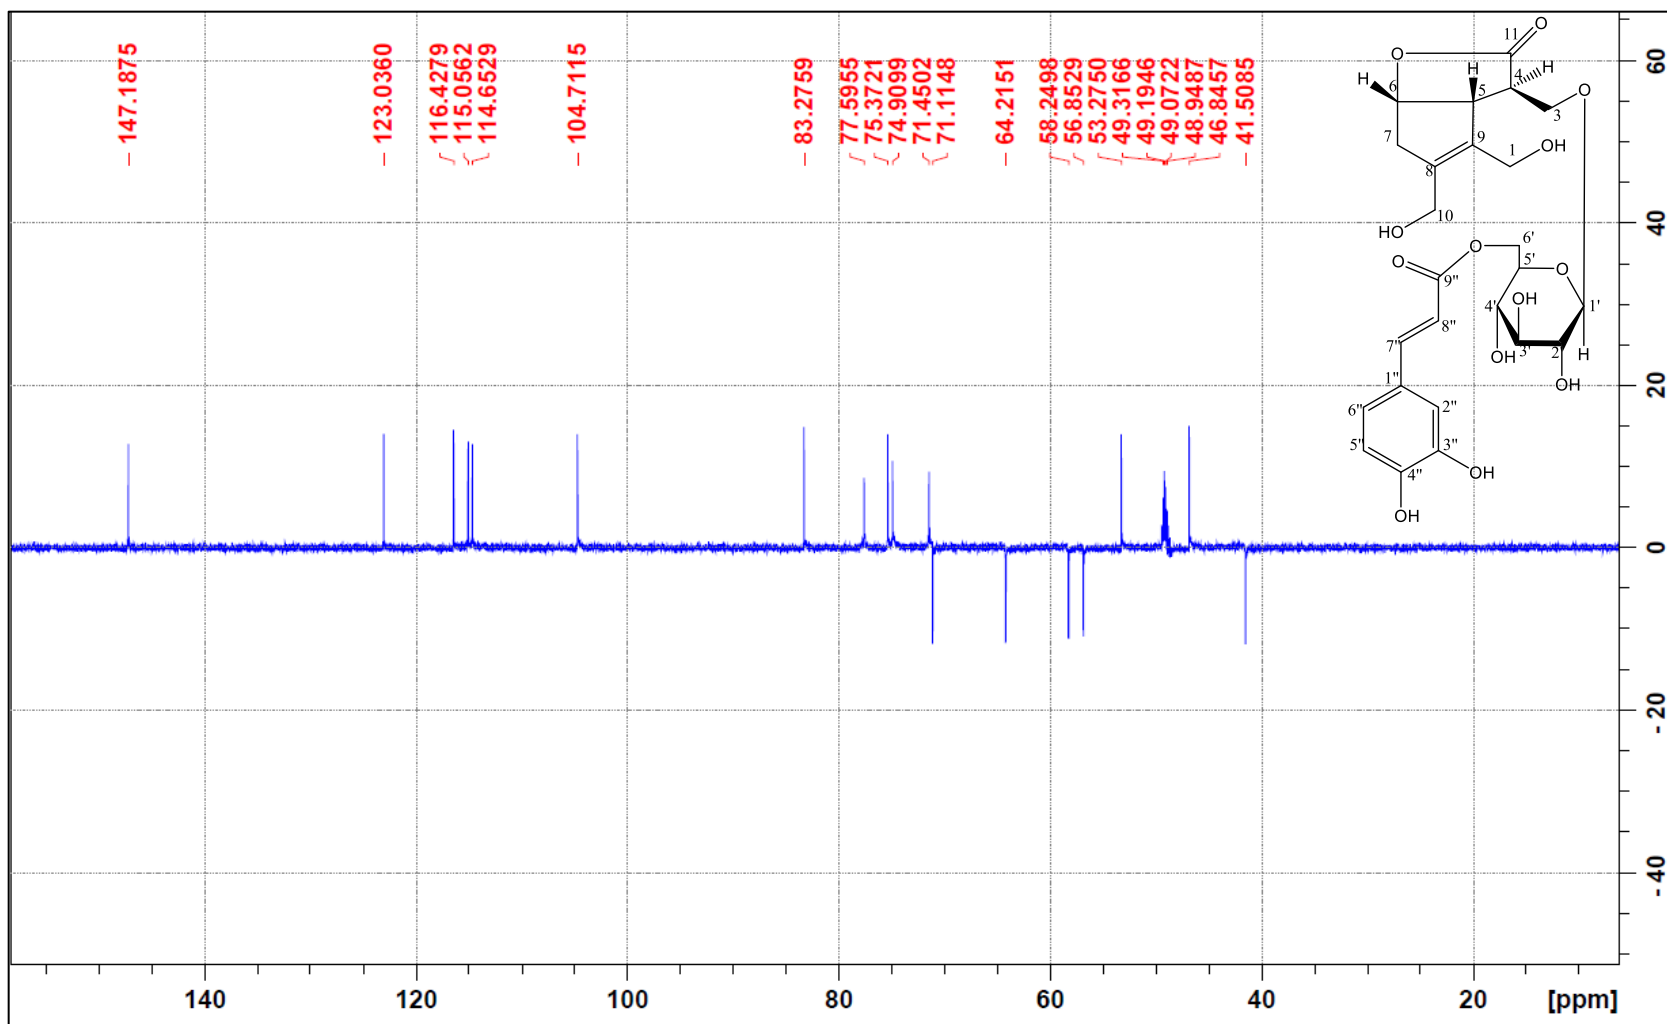

**Figure 23.** The COSY spectrum of **3** in CD<sub>3</sub>OD, 700 MHz.

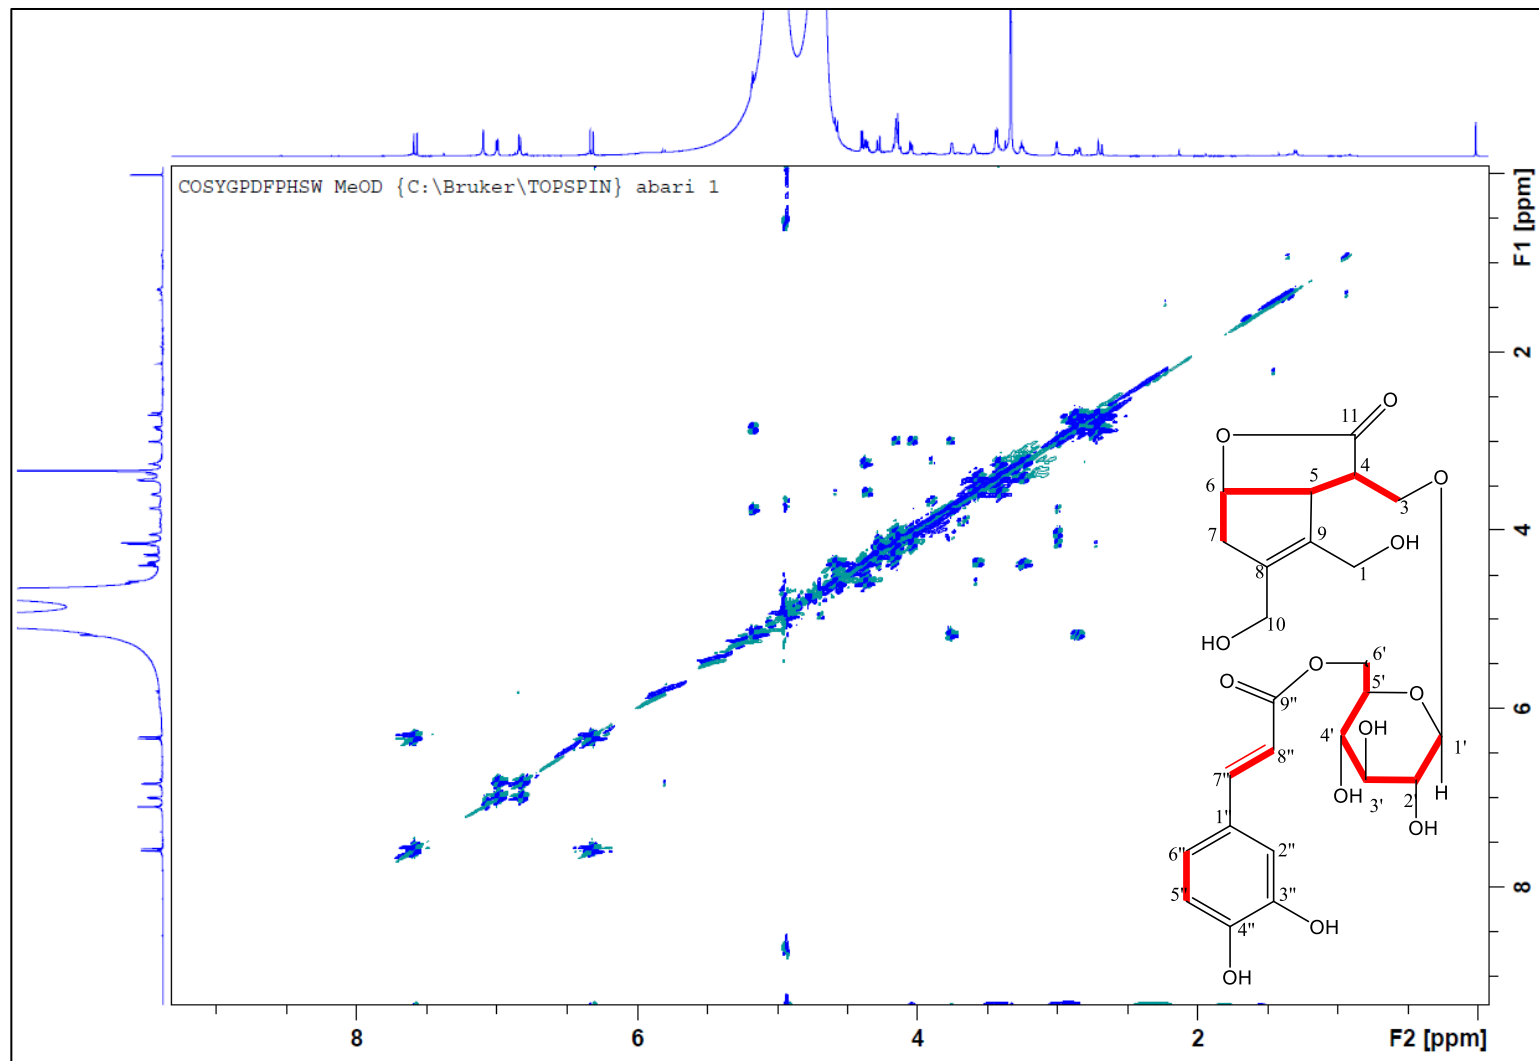

**Figure 24.** The HSQC spectrum of **3** in CD<sub>3</sub>OD, 700 MHz

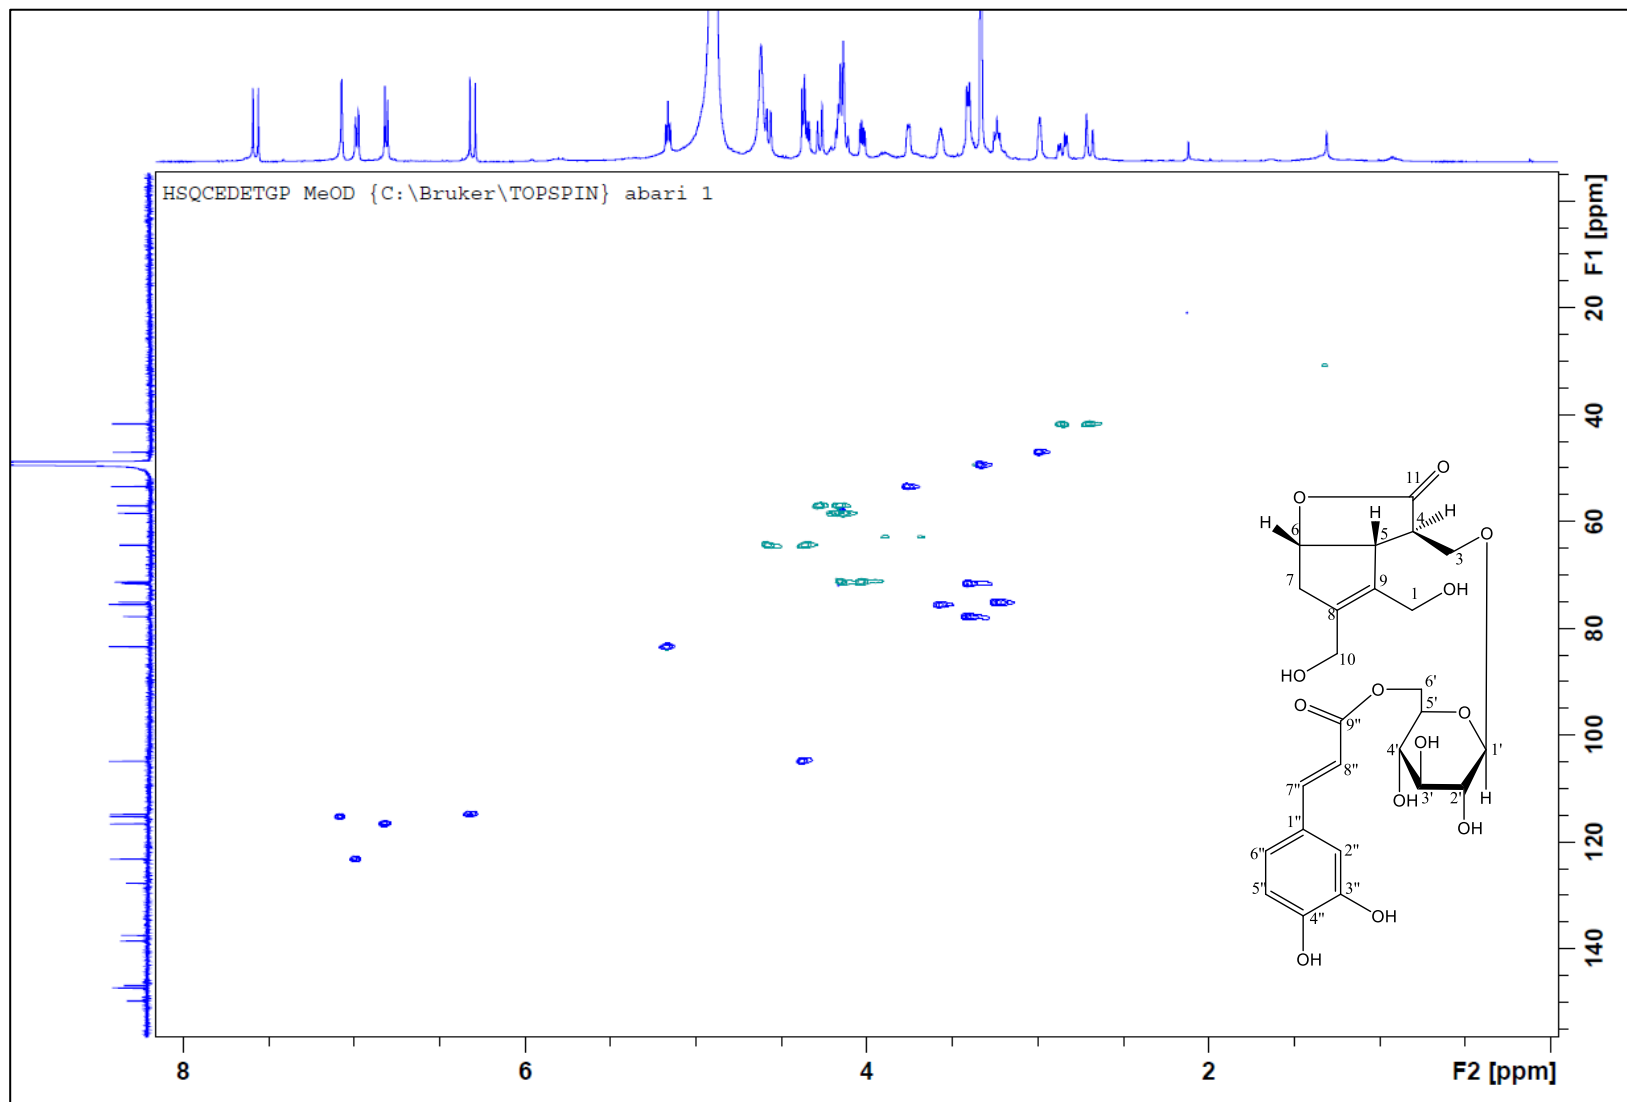

**Figure 25.** The HSQC spectrum of **3** in CD<sub>3</sub>OD, 700 MHz.

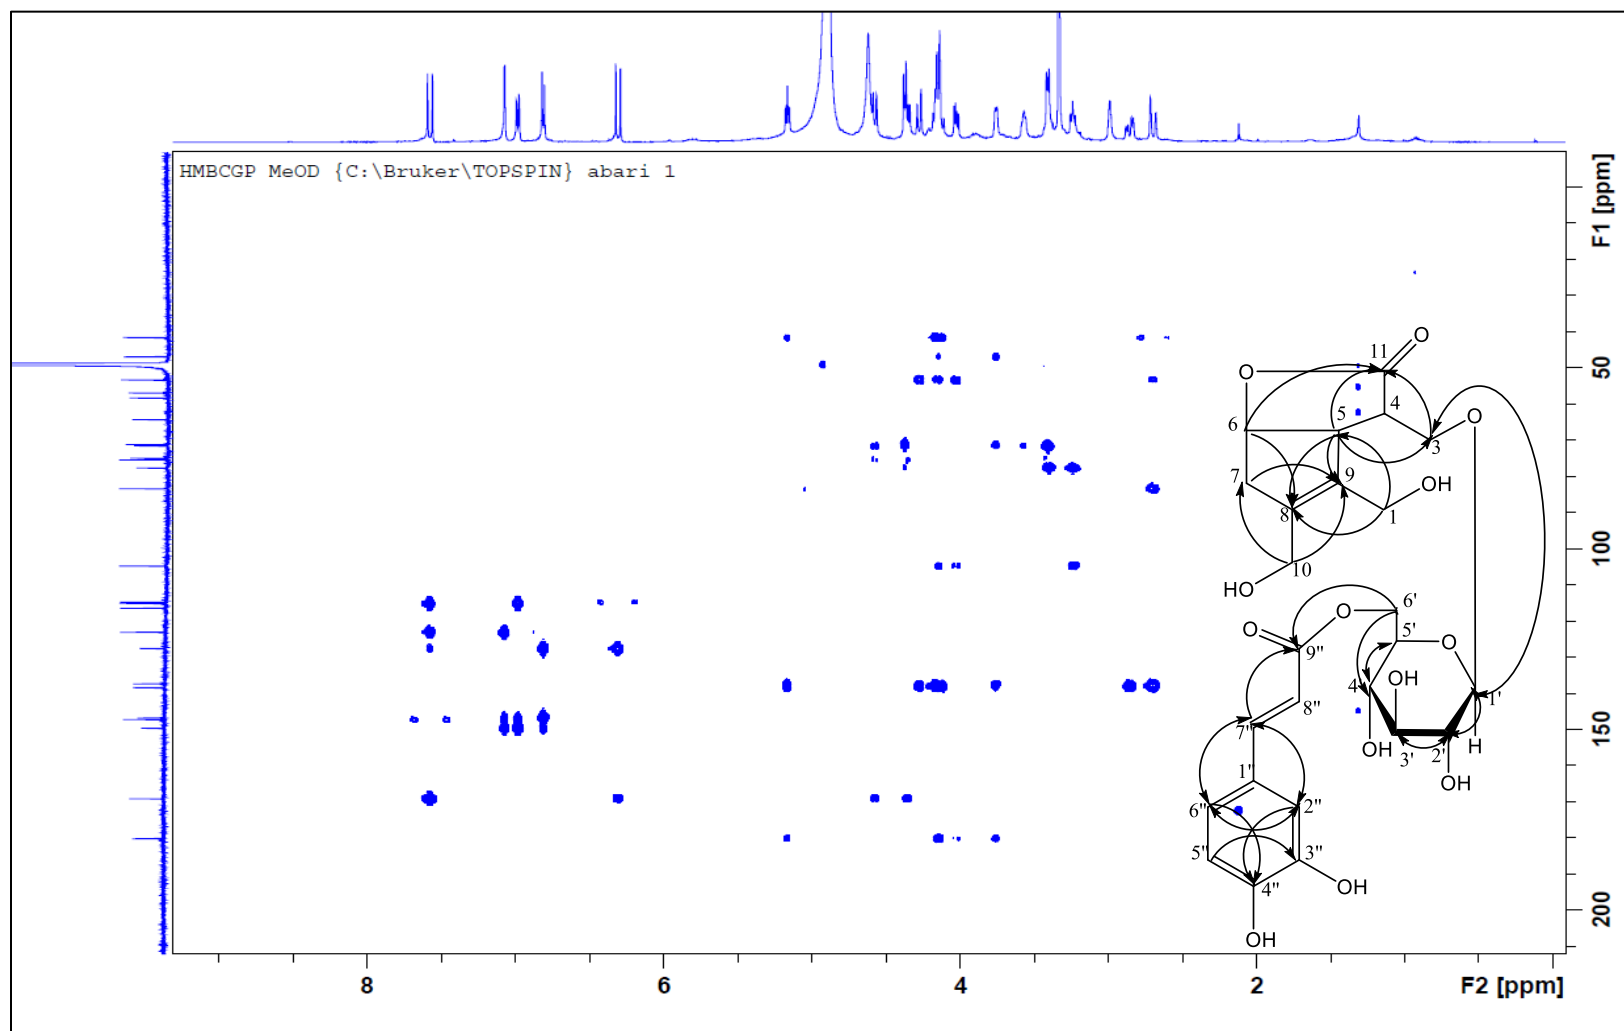

**Figure 26.** The NOESY spectrum of **2** in CD<sub>3</sub>OD, 500 MHz.

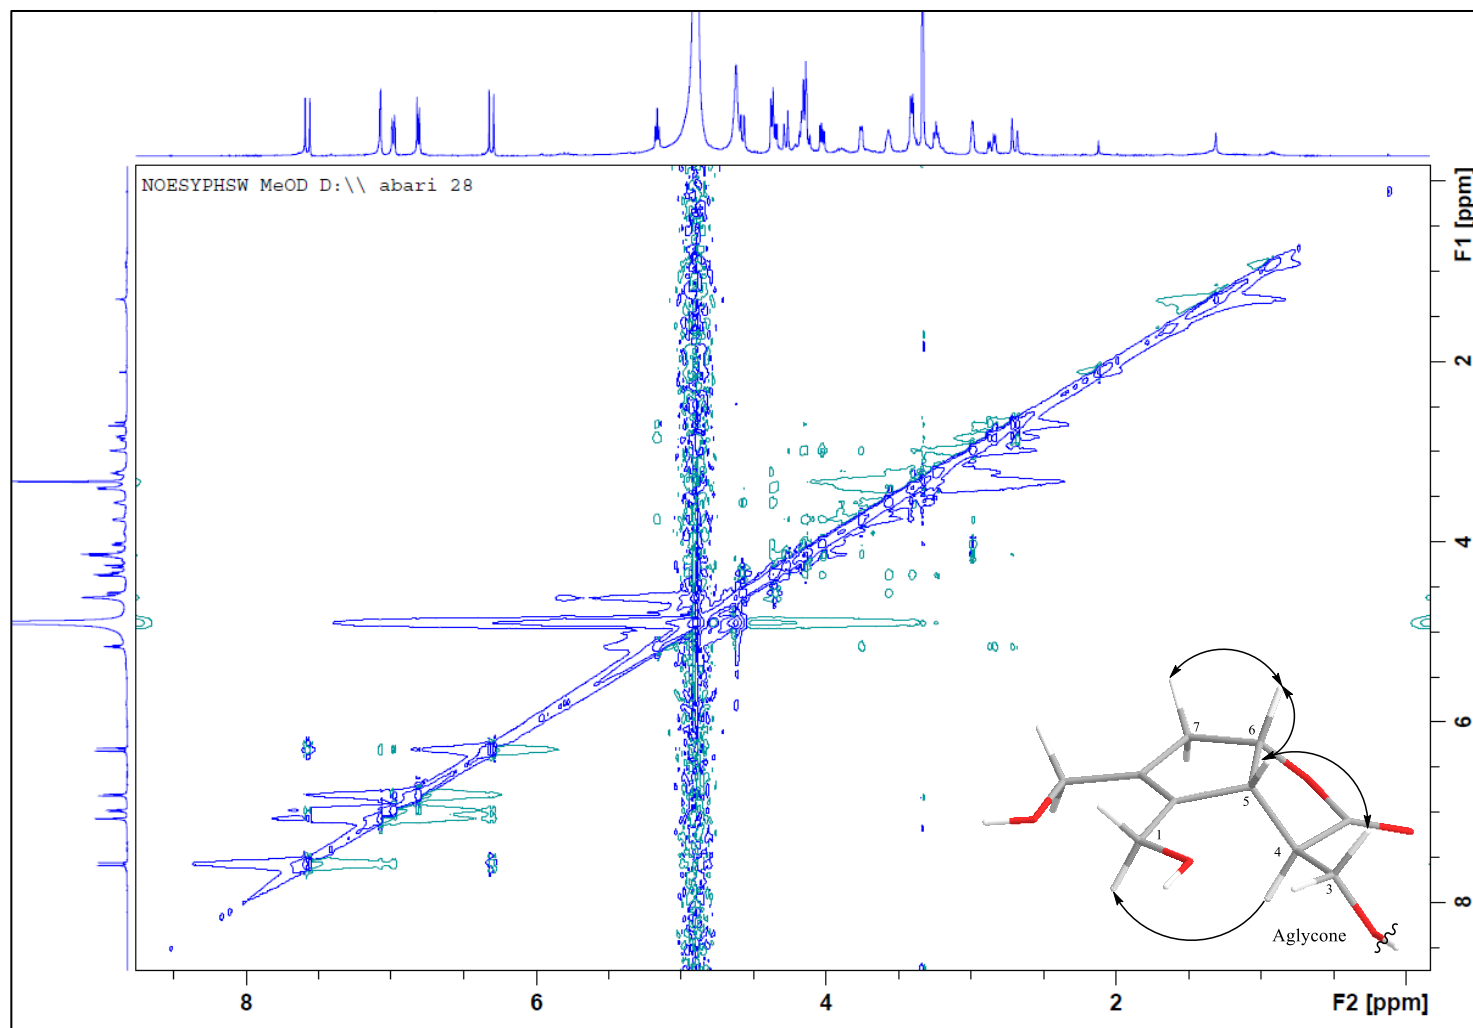

Figure 27. The IR spectrum of 3.

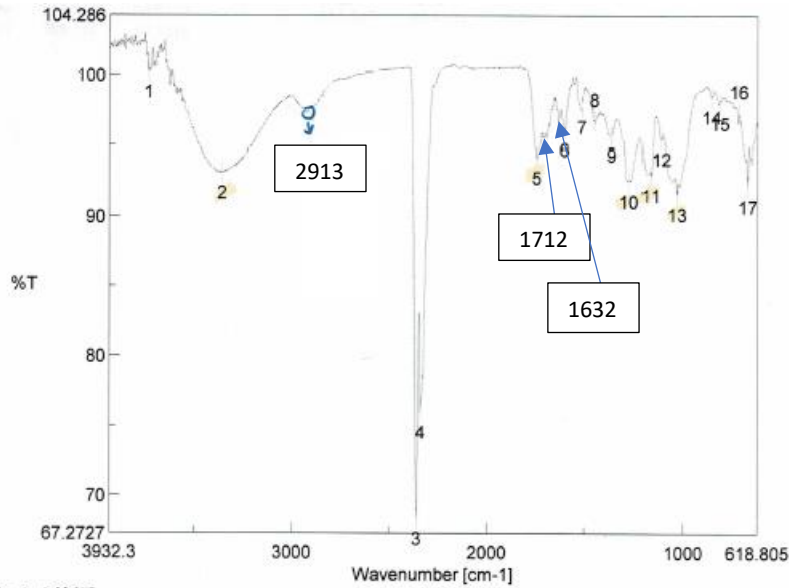

[コメント情報]

試料名  
コメント  
測定者  
所属  
会社 HU

[データ情報]

作成日時 2018/06/28 17:04  
データタイプ 等間隔データ  
横軸 Wavenumber [cm-1]  
縦軸 %T  
スタート 599.753 cm-1  
エンド 7800.65 cm-1  
データ間隔 0.964233 cm-1  
データ数 7469

[測定情報]

機種名 FT/IR-4600typeA  
シリアル番号 D015461786  
測定日時 2018/06/28 17:04  
光源 標準光源  
検出器 TGS  
積算回数 10  
分解 4 cm-1  
ゼロフィリング On  
アポダイゼーション Cosine  
ゲイン Auto (2)  
アパーチャー Auto (7.1 mm)  
スキャンスピード Auto (2 mm/sec)  
フィルタ Auto (30000 Hz)

[ピーク検出結果]

| No. | 位置      | 強度      | No. | 位置      | 強度      |
|-----|---------|---------|-----|---------|---------|
| 1   | 3732.55 | 100.201 | 2   | 3356.5  | 93.0717 |
| 3   | 2361.41 | 68.3232 | 4   | 2341.16 | 75.9363 |
| 5   | 1745.26 | 94.149  | 6   | 1600.63 | 96.1241 |
| 7   | 1512.88 | 97.7611 | 8   | 1448.28 | 96.8026 |
| 9   | 1360.53 | 95.7487 | 10  | 1274.72 | 92.4856 |
| 11  | 1165.76 | 92.9243 | 12  | 1111.76 | 95.487  |
| 13  | 1032.69 | 91.5669 | 14  | 856.239 | 98.461  |

[ピーク検出結果]

| No. | 位置      | 強度      | No. | 位置      | 強度      |
|-----|---------|---------|-----|---------|---------|
| 15  | 813.813 | 98.0127 | 16  | 714.497 | 97.4101 |
| 17  | 669.178 | 92.1315 |     |         |         |

Figure 28. The UV spectrum of 3.

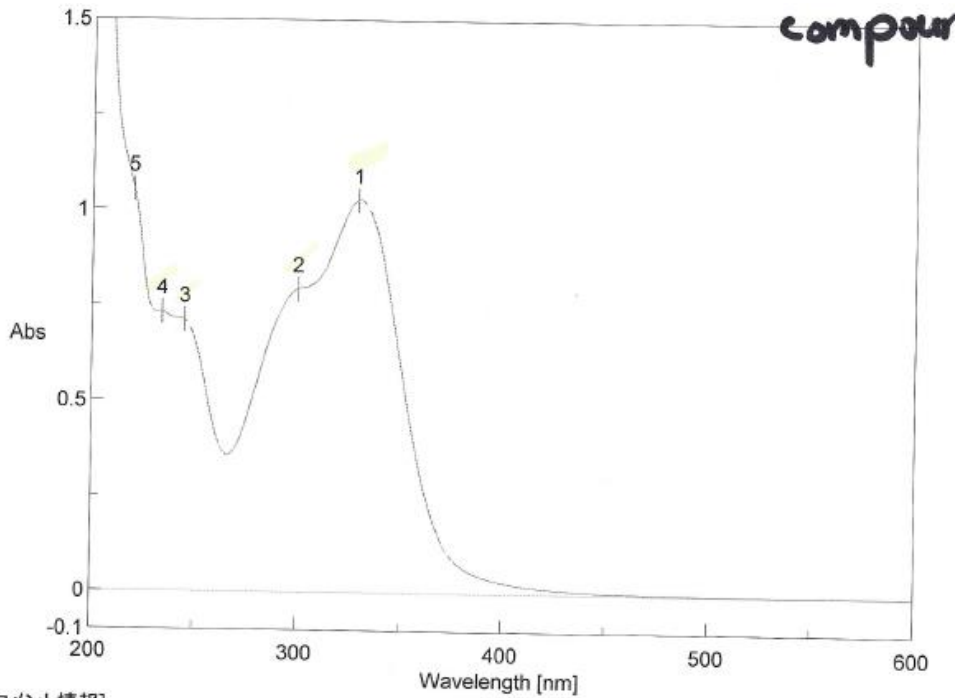

[コメント情報]

試料名  
コメント  
測定者  
所属  
会社 HU

[データ情報]

作成日時 2018/07/02 20:30  
データタイプ 等間隔データ  
横軸 Wavelength [nm]  
縦軸 Abs  
スタート 600 nm  
エンド 200 nm  
データ間隔 1 nm  
データ数 401

[測定情報]

装置名 V-630  
機種名 V-630  
シリアル番号 A042161148  
測定日時 2018/07/02 20:29  
測光モード Abs  
測定範囲 600 - 200 nm  
データ取込間隔 1 nm  
UV/Vis バンド幅 1.5 nm  
レスポンス Fast  
走査速度 400 nm/min  
光源切換 340 nm  
光源 D2/WI  
フィルタ切換 ステップ  
補正 ベースライン

[ピーク検出結果]

| No. | 位置  | 強度       | No. | 位置  | 強度       |
|-----|-----|----------|-----|-----|----------|
| 1   | 329 | 1.02845  | 2   | 300 | 0.795039 |
| 3   | 245 | 0.711464 | 4   | 234 | 0.732239 |
| 5   | 220 | 1.05375  |     |     |          |

**Figure 29.** The HRESIMS spectrum of **4**.

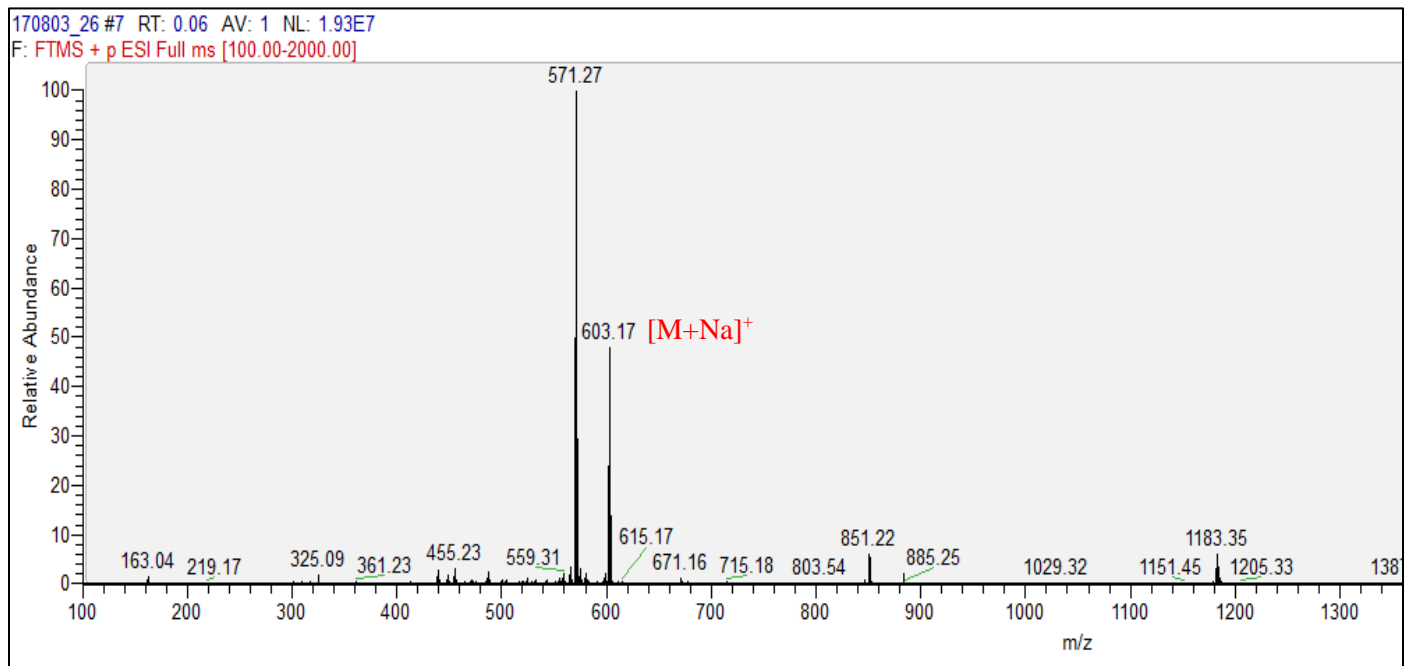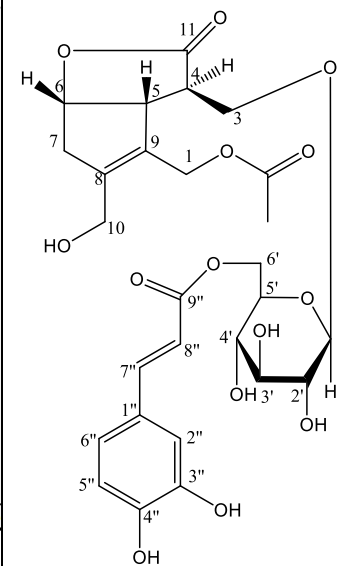

Elemental composition search on mass 603.17

m/z= 598.17-608.17

| m/z      | Theo. Mass | Delta (mmu) | RDB equiv. | Composition                                        |
|----------|------------|-------------|------------|----------------------------------------------------|
| 603.1685 | 603.1684   | 0.03        | 11.5       | C <sub>27</sub> H <sub>32</sub> O <sub>14</sub> Na |



Figure 30. The  $^1\text{H}$  NMR spectrum of **4** in  $\text{CD}_3\text{OD}$ , 500 MHz.

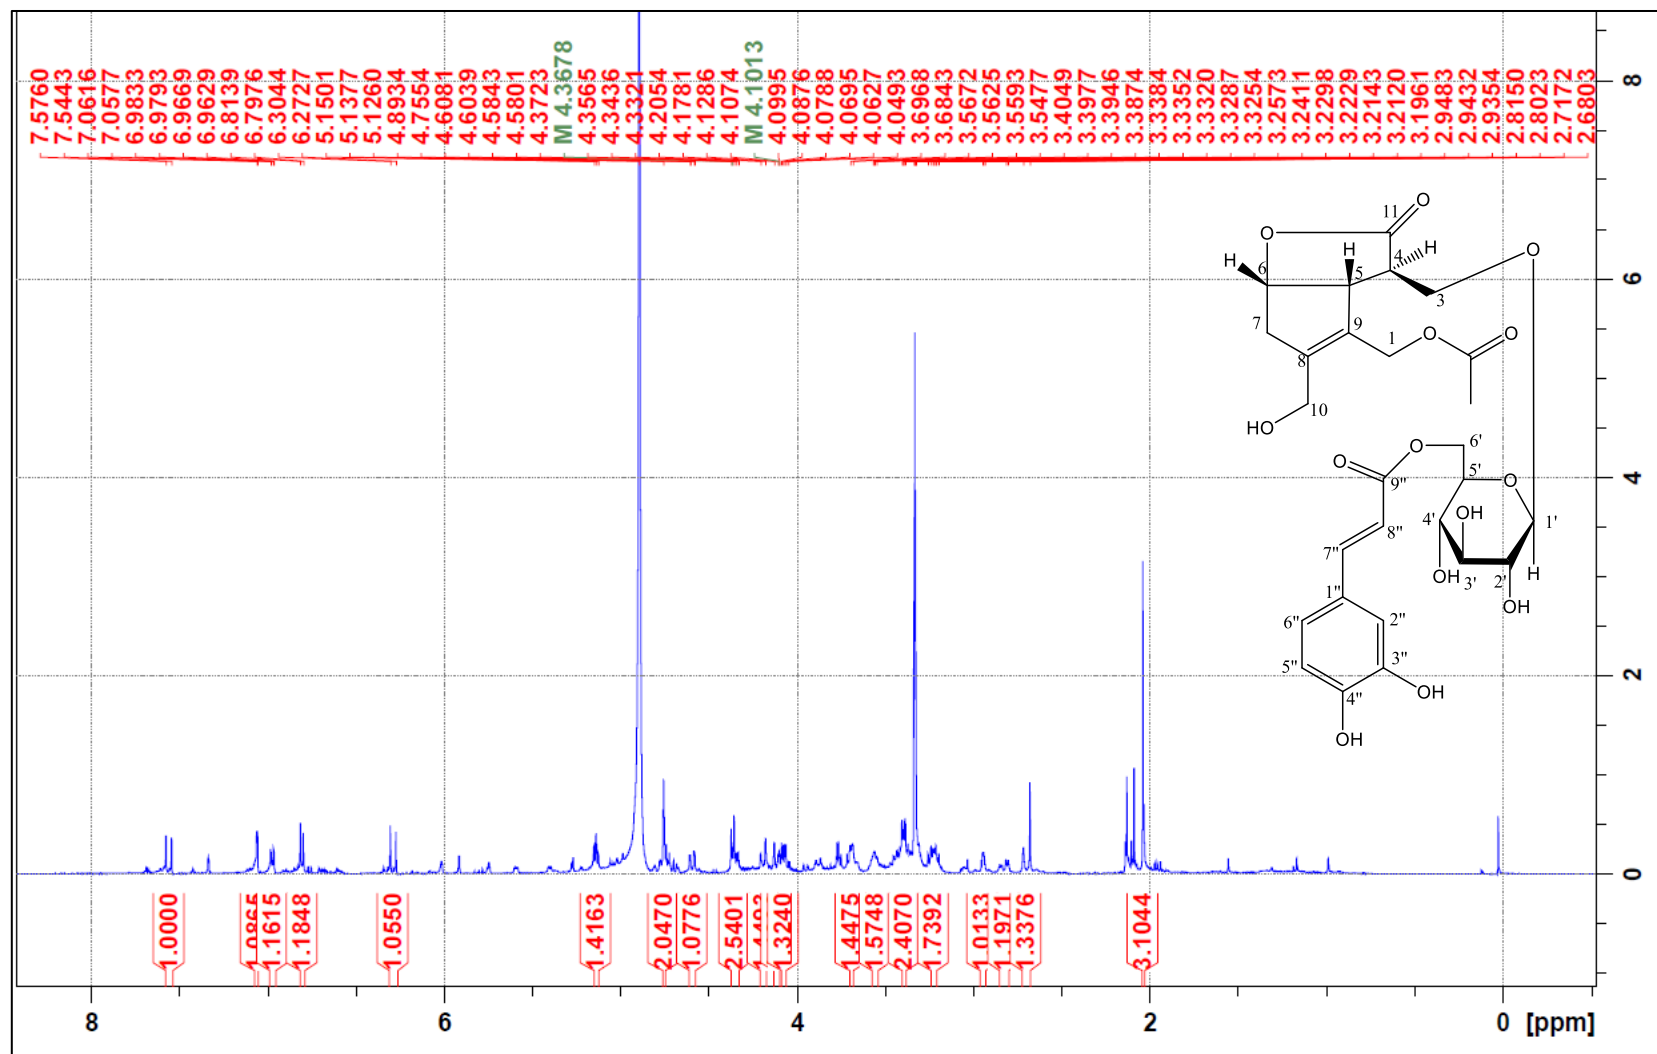

**Figure 31.** The  $^{13}\text{C}$  NMR spectrum of **3** in  $\text{CD}_3\text{OD}$ , 175 MHz.

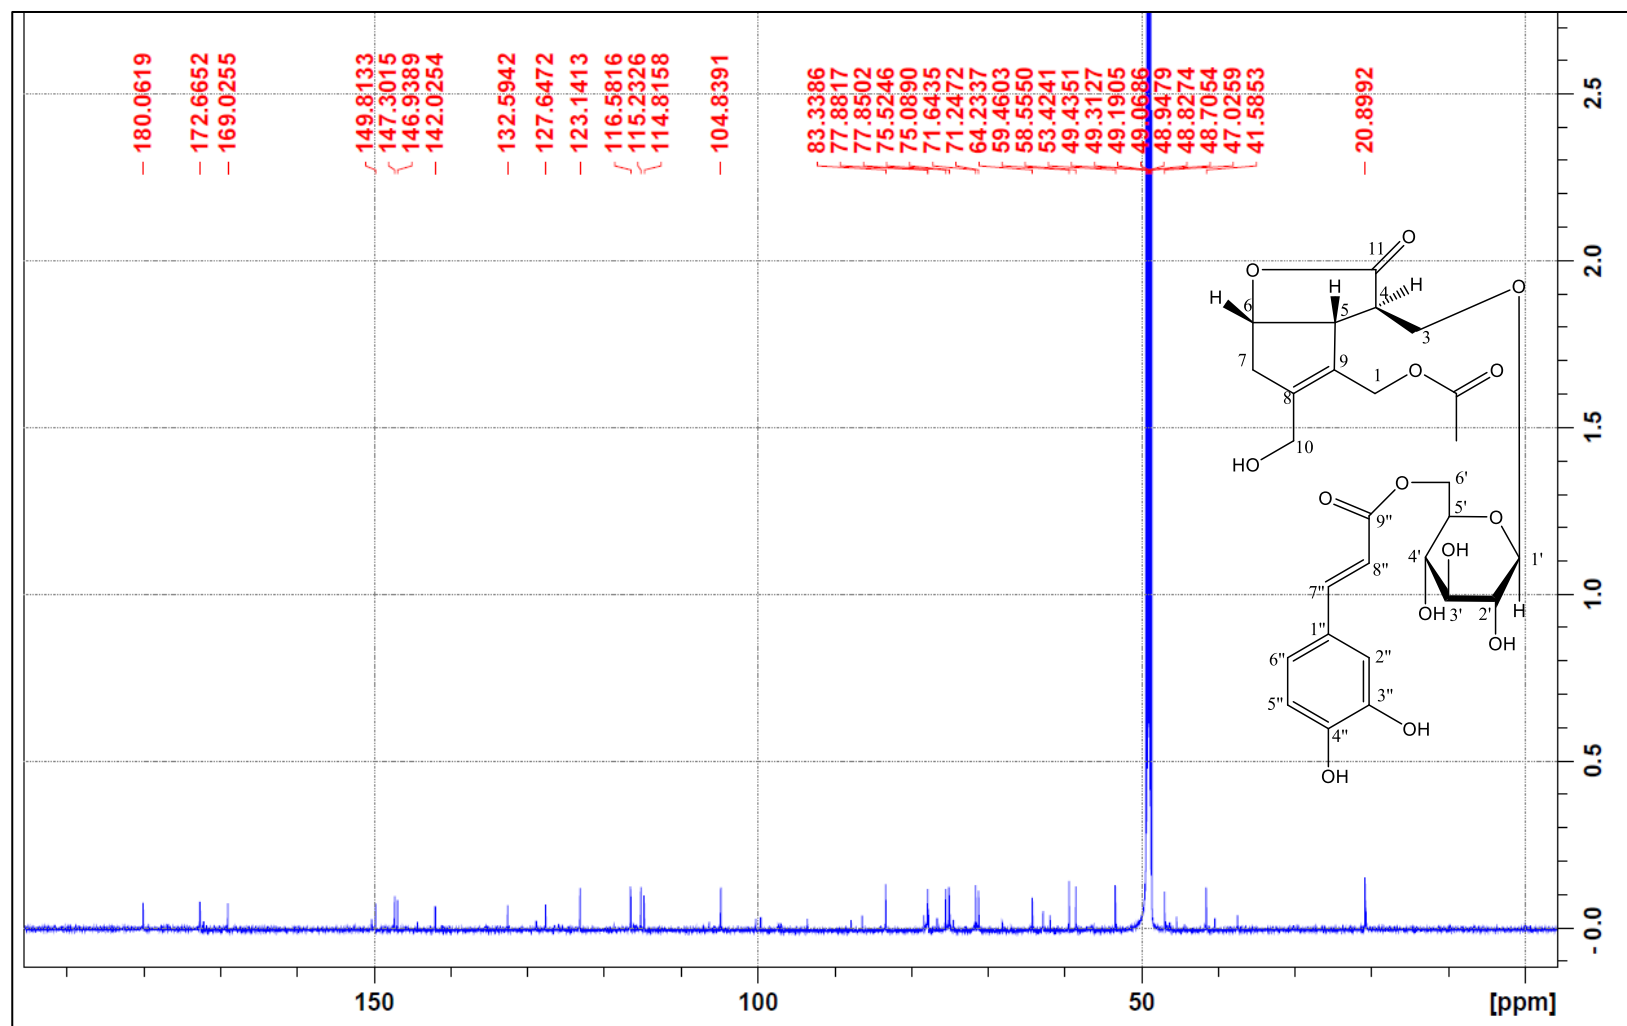

**Figure 32.** The DEPT-135 NMR spectrum of **4** in CD<sub>3</sub>OD, 175 MHz.

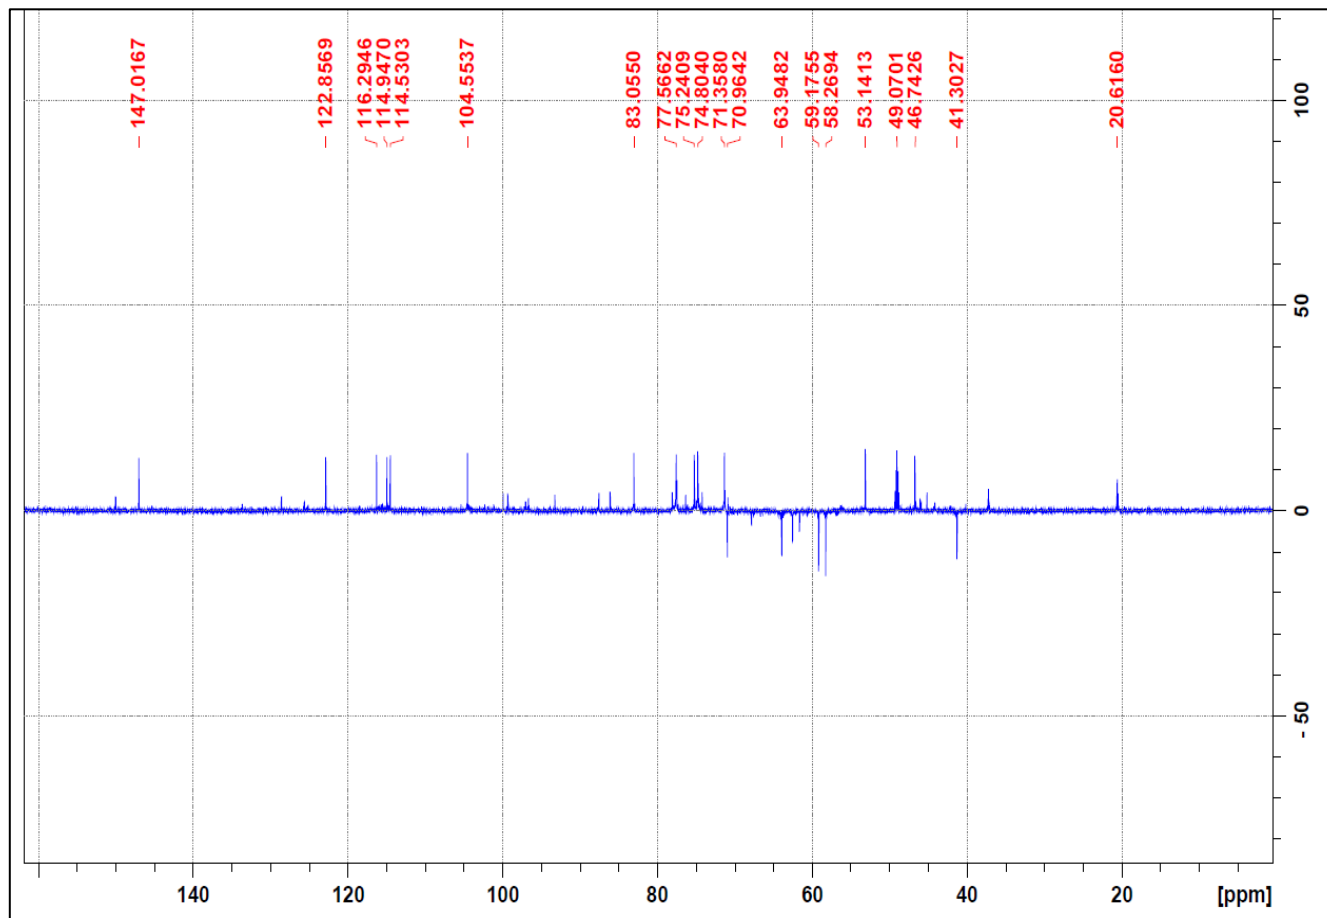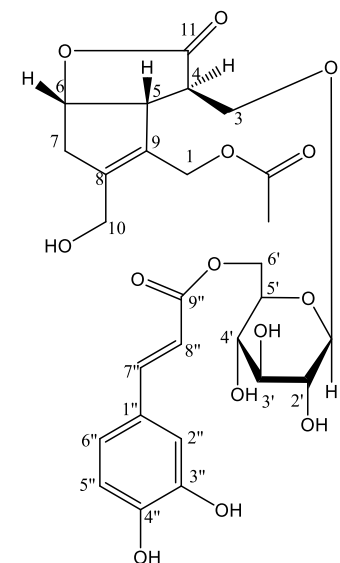

**Figure 33.** The COSY spectrum of **4** in CD<sub>3</sub>OD, 500 MHz.

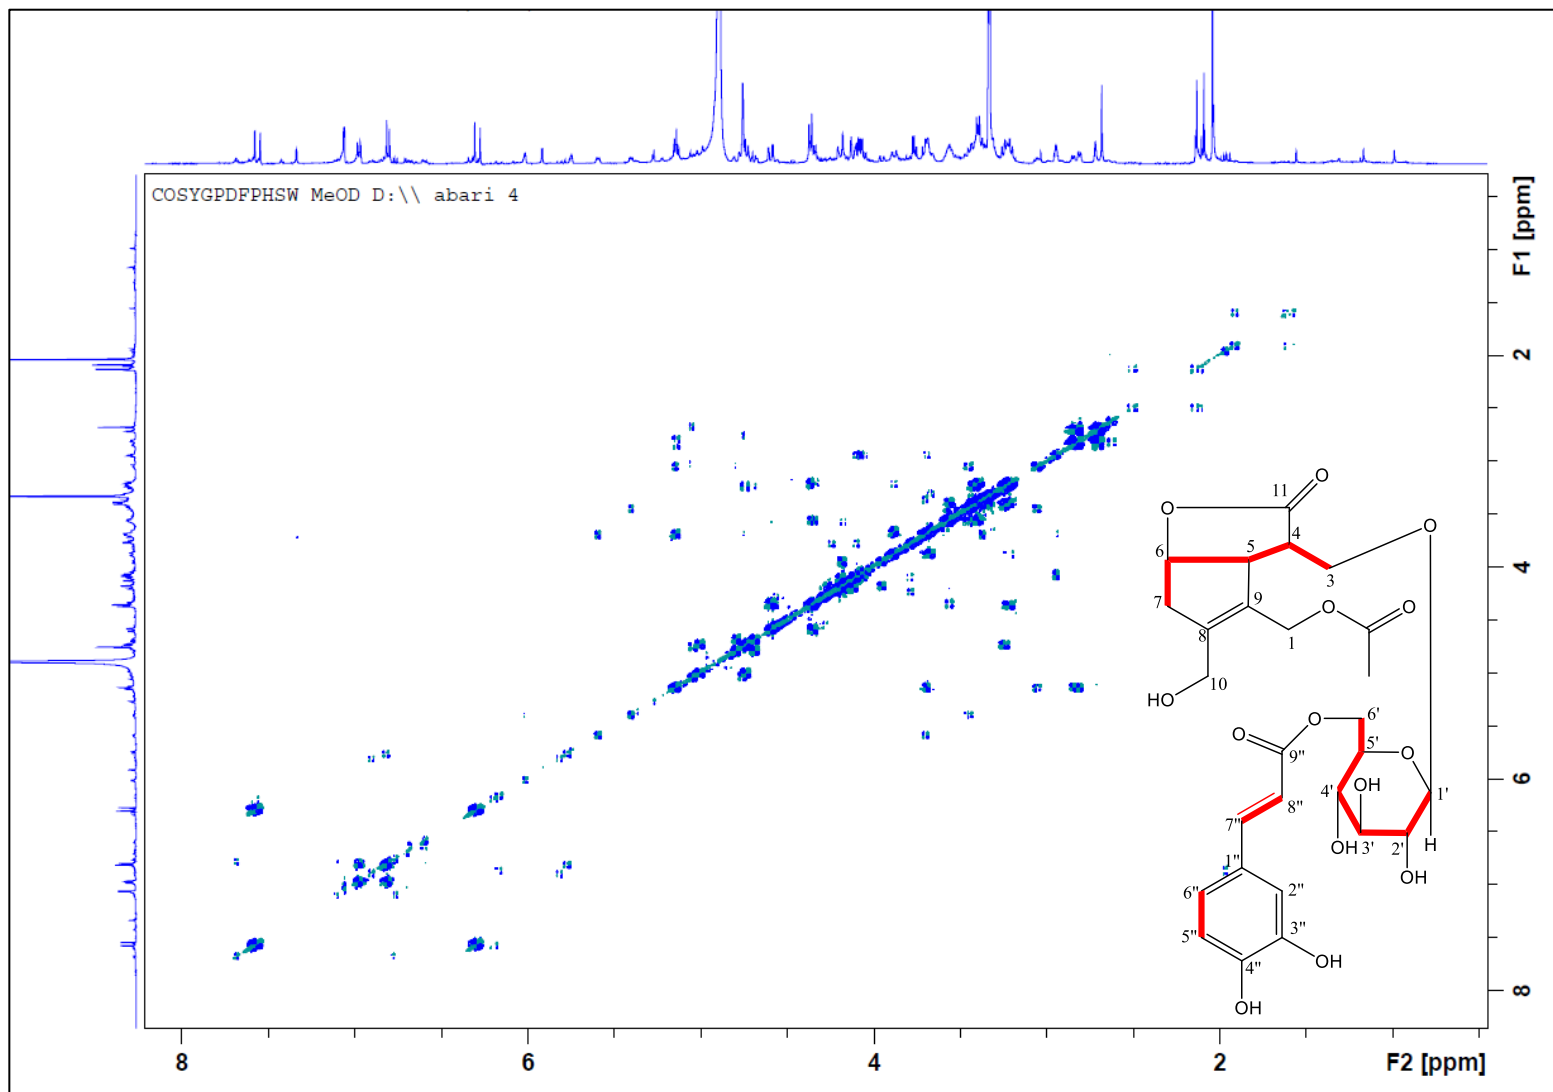

**Figure 34.** The HSQC spectrum of **4** in CD<sub>3</sub>OD, 700 MHz.

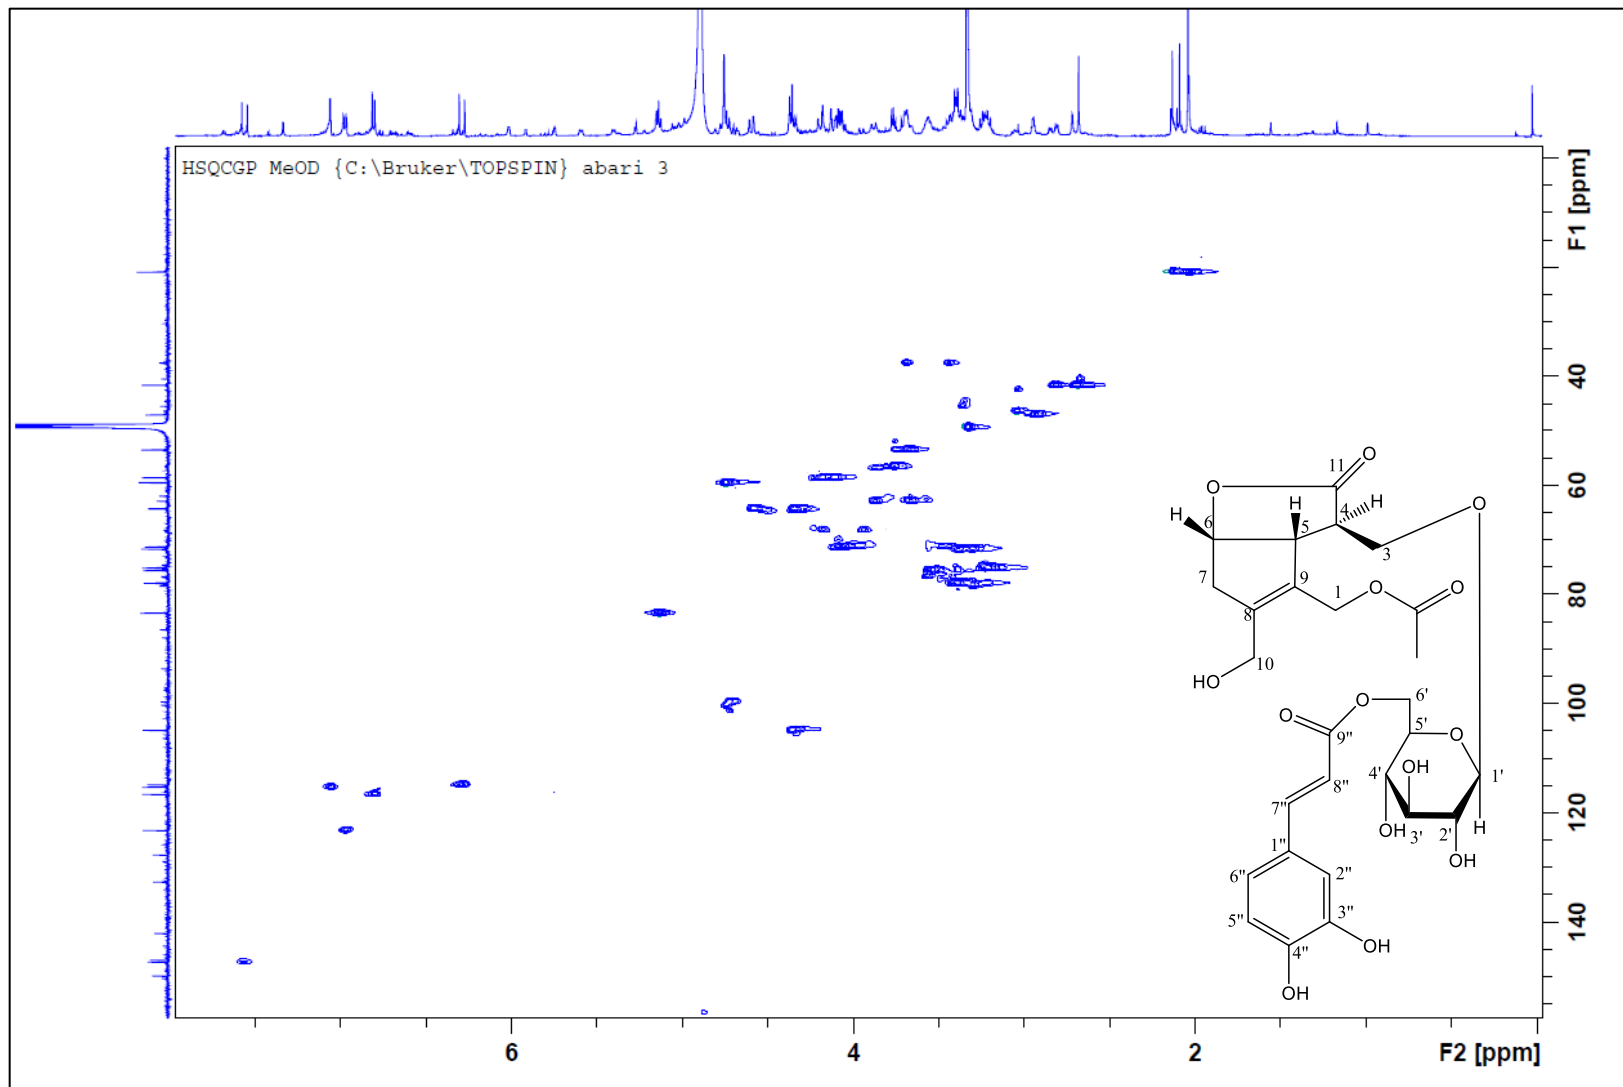

**Figure 35.** The HMBC spectrum of **4** in CD<sub>3</sub>OD, 700 MHz.

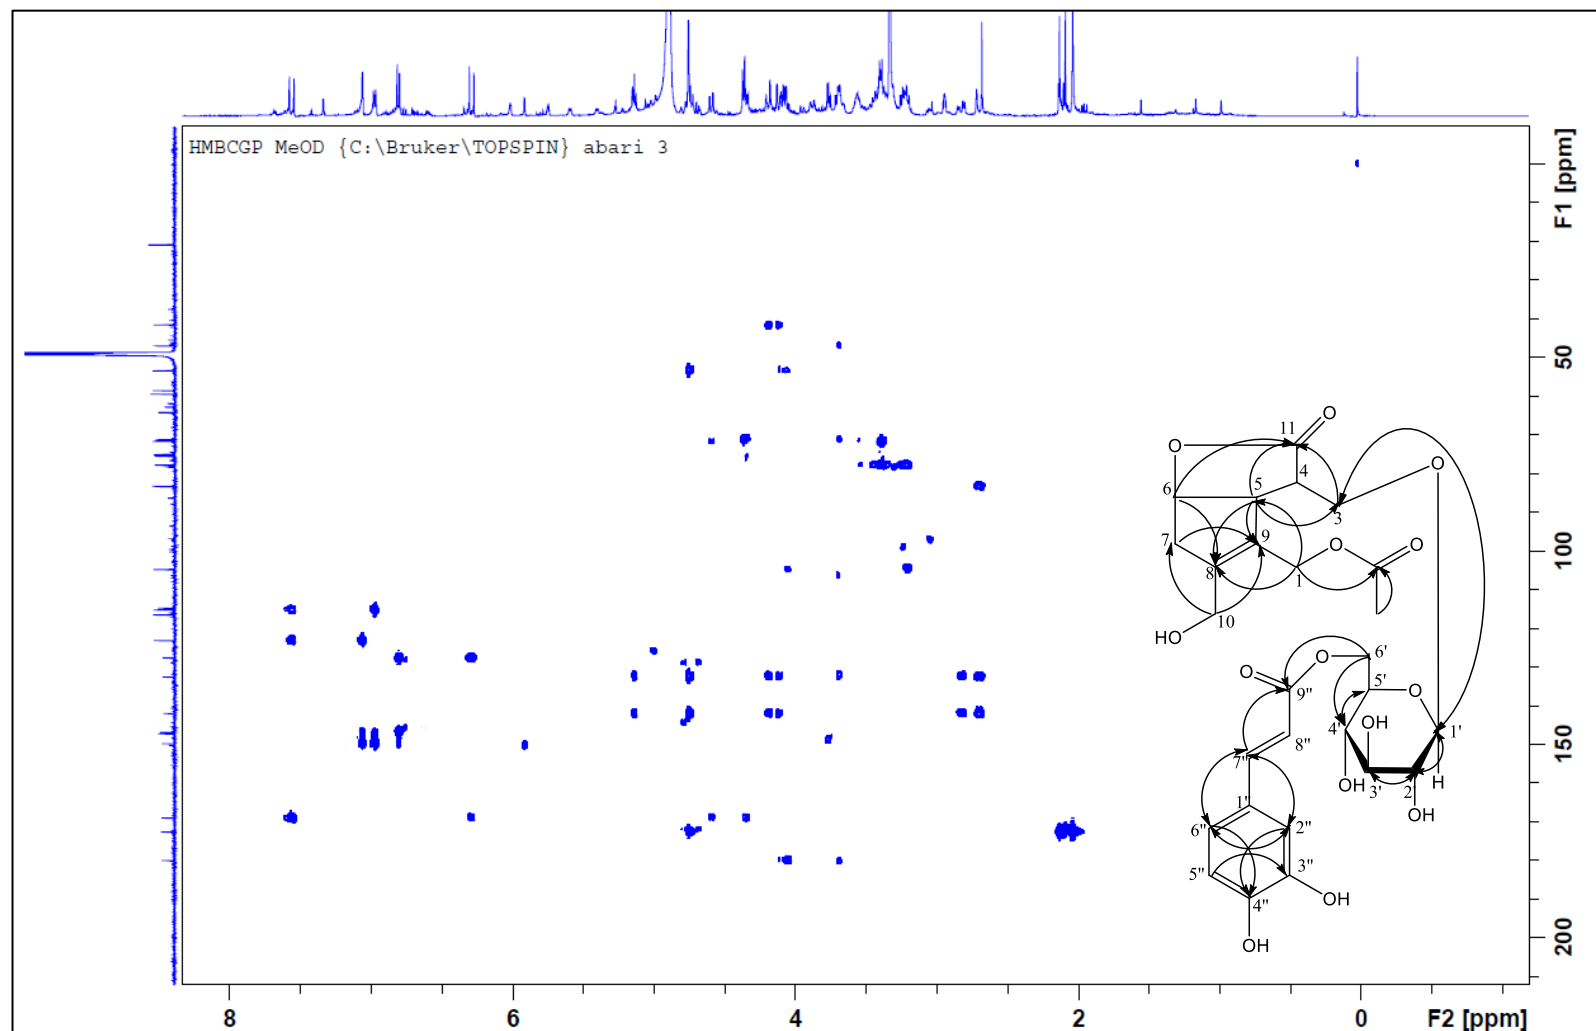

Figure 36. The NOESY spectrum of **4** in CD<sub>3</sub>OD, 500 MHz.

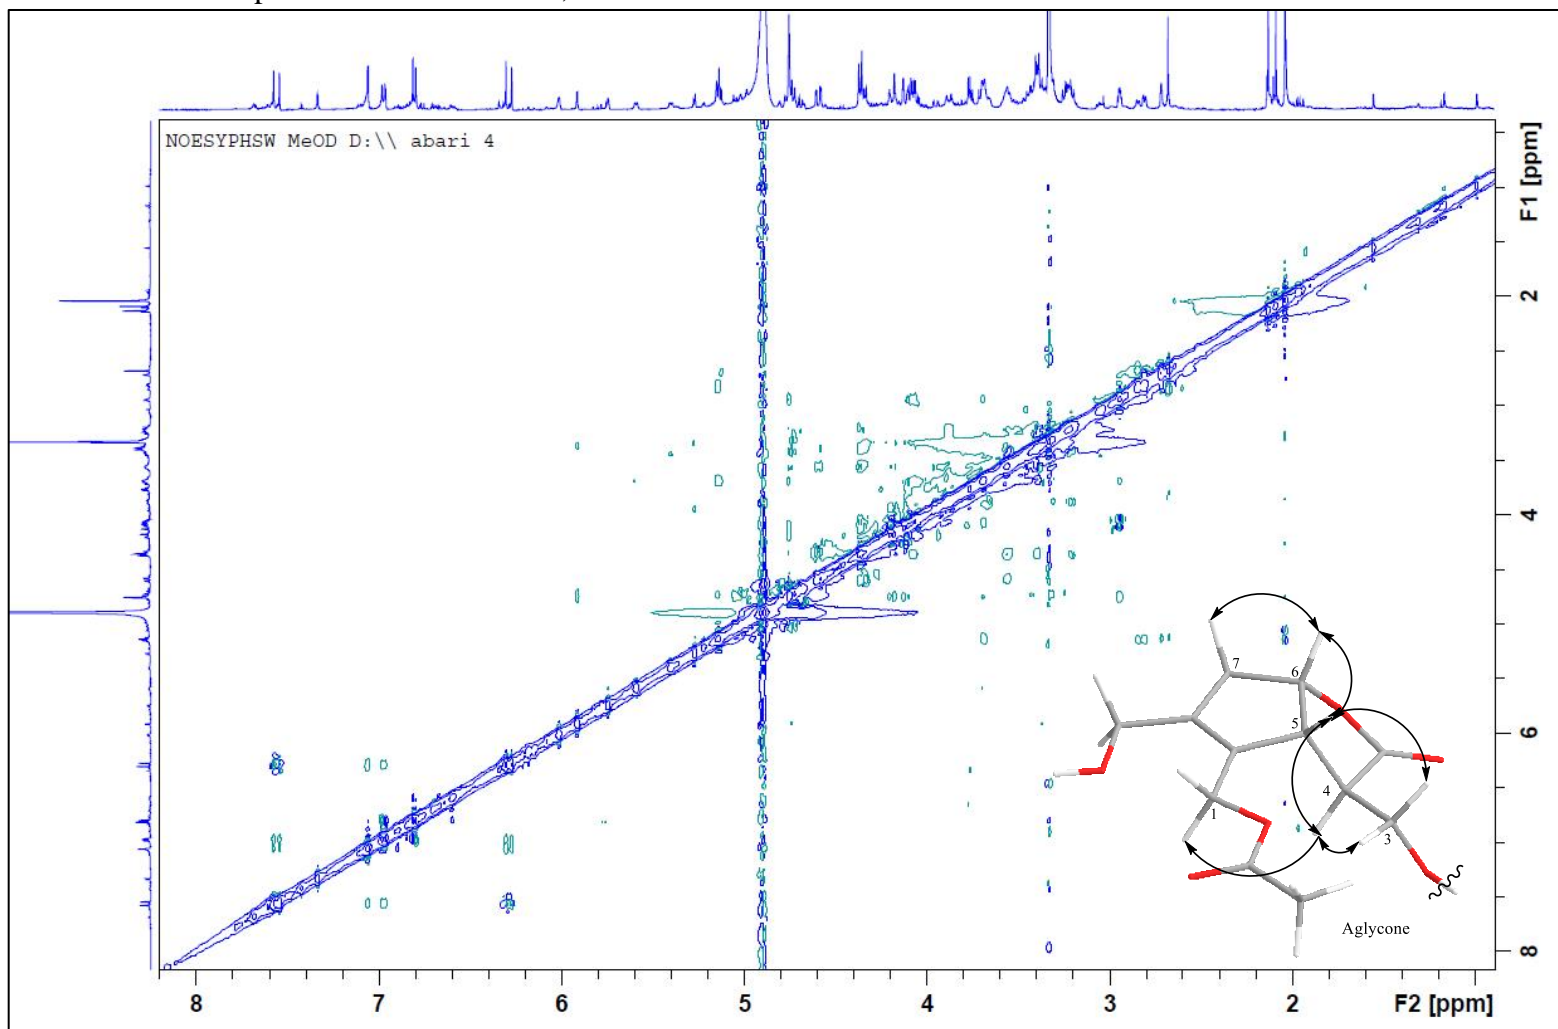

Figure 37. The IR spectrum of 4.

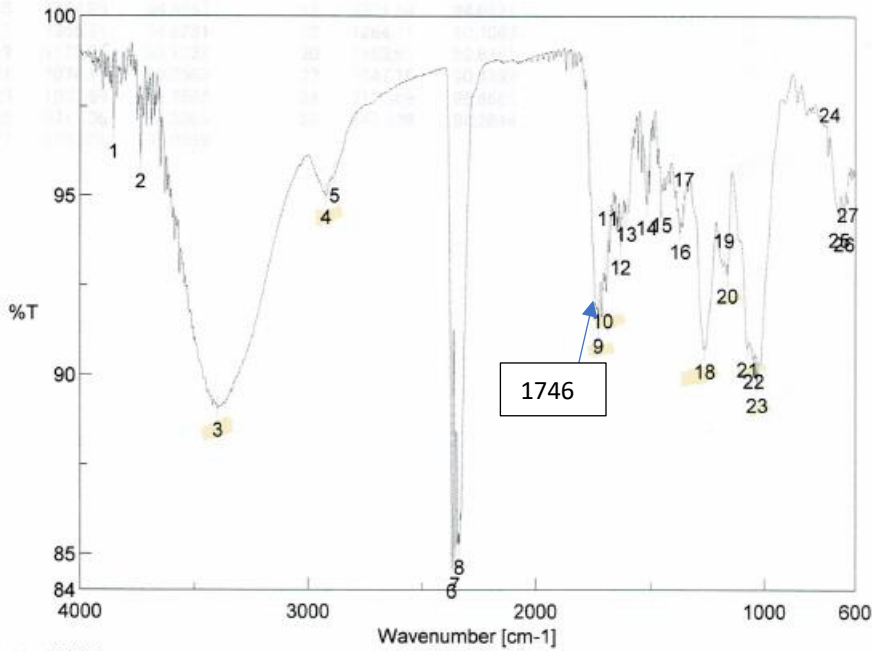

[コメント情報]

試料名  
コメント  
測定者  
所属  
会社 HU

[データ情報]

作成日時 2018/06/28 16:34  
データタイプ 等間隔データ  
横軸 Wavenumber [cm-1]  
縦軸 %T  
スタート 599.753 cm-1  
エンド 7800.65 cm-1  
データ間隔 0.964233 cm-1  
データ数 7469

[測定情報]

機種名 FT/IR-4600typeA  
シリアル番号 D015461786  
測定日時 2018/06/28 16:34  
光源 標準光源  
検出器 TGS  
積算回数 10  
分解 4 cm-1  
ゼロフィリング On  
アポダイゼーション Cosine  
ゲイン Auto (2)  
アパーチャー Auto (7.1 mm)  
スキャンスピード Auto (2 mm/sec)  
フィルタ Auto (30000 Hz)

[ピーク検出結果]

| No. | 位置      | 強度      | No. | 位置      | 強度      |
|-----|---------|---------|-----|---------|---------|
| 1   | 3852.11 | 96.8495 | 2   | 3733.51 | 96.0049 |
| 3   | 3396.03 | 89.0751 | 4   | 2920.66 | 95.0033 |
| 5   | 2883.06 | 95.5993 | 6   | 2367.19 | 84.5837 |
| 7   | 2354.66 | 84.7644 | 8   | 2335.37 | 85.245  |
| 9   | 1732.73 | 91.4031 | 10  | 1713.44 | 92.1058 |
| 11  | 1690.3  | 93.7358 | 12  | 1634.38 | 93.6187 |
| 13  | 1608.34 | 94.5546 | 14  | 1518.67 | 94.7232 |

[ピーク検出結果]

| No. | 位置      | 強度      | No. | 位置      | 強度      |
|-----|---------|---------|-----|---------|---------|
| 15  | 1454.06 | 94.8053 | 16  | 1371.14 | 94.0681 |
| 17  | 1355.71 | 94.8281 | 18  | 1264.11 | 90.7063 |
| 19  | 1179.26 | 93.1239 | 20  | 1163.83 | 92.8161 |
| 21  | 1074.16 | 90.7582 | 22  | 1047.16 | 90.4392 |
| 23  | 1032.69 | 89.7685 | 24  | 712.569 | 96.6683 |
| 25  | 671.106 | 94.3969 | 26  | 648.929 | 94.2844 |
| 27  | 633.501 | 95.0969 |     |         |         |



Figure 38. The UV spectrum of 4.

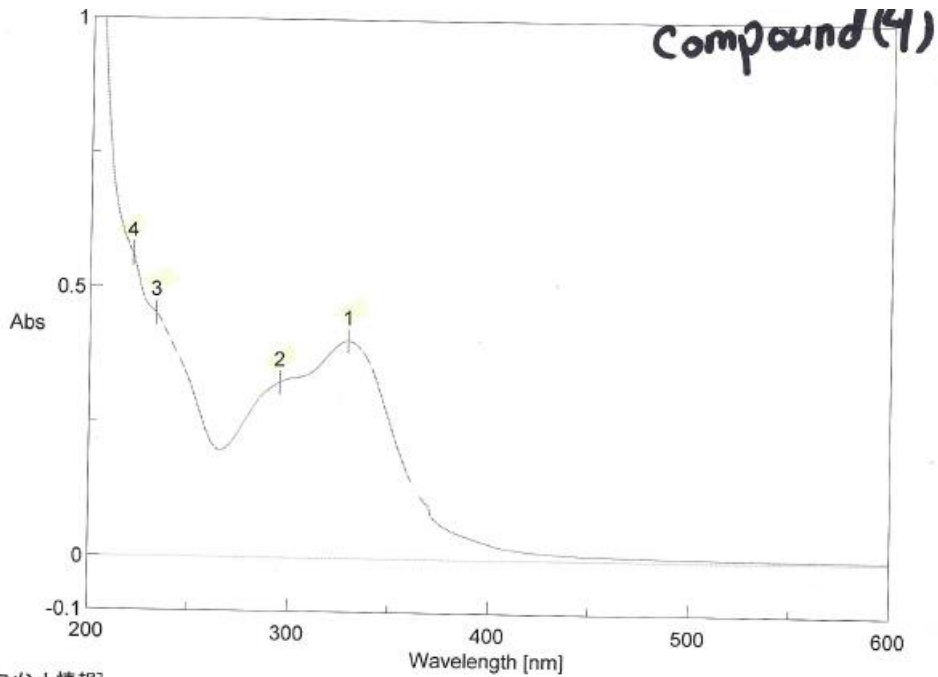

[コメント情報]

試料名  
コメント  
測定者  
所属  
会社 HU

[データ情報]

作成日時 2018/07/02 19:44  
データタイプ 等間隔データ  
横軸 Wavelength [nm]  
縦軸 Abs  
スタート 600 nm  
エンド 200 nm  
データ間隔 1 nm  
データ数 401

[測定情報]

装置名 V-630  
機種名 V-630  
シリアル番号 A042161148  
測定日時 2018/07/02 19:42  
測光モード Abs  
測定範囲 600 - 200 nm  
データ取込間隔 1 nm  
UV/Vis バンド幅 1.5 nm  
レスポンス Fast  
走査速度 400 nm/min  
光源切換 340 nm  
光源 D2/WI  
フィルタ切換 ステップ  
補正 ベースライン

[ピーク検出結果]

| No. | 位置  | 強度       | No. | 位置  | 強度       |
|-----|-----|----------|-----|-----|----------|
| 1   | 329 | 0.403842 | 2   | 295 | 0.325442 |
| 3   | 233 | 0.453021 | 4   | 221 | 0.561628 |

**Figure 39.** The HRESIMS spectrum of **5**.

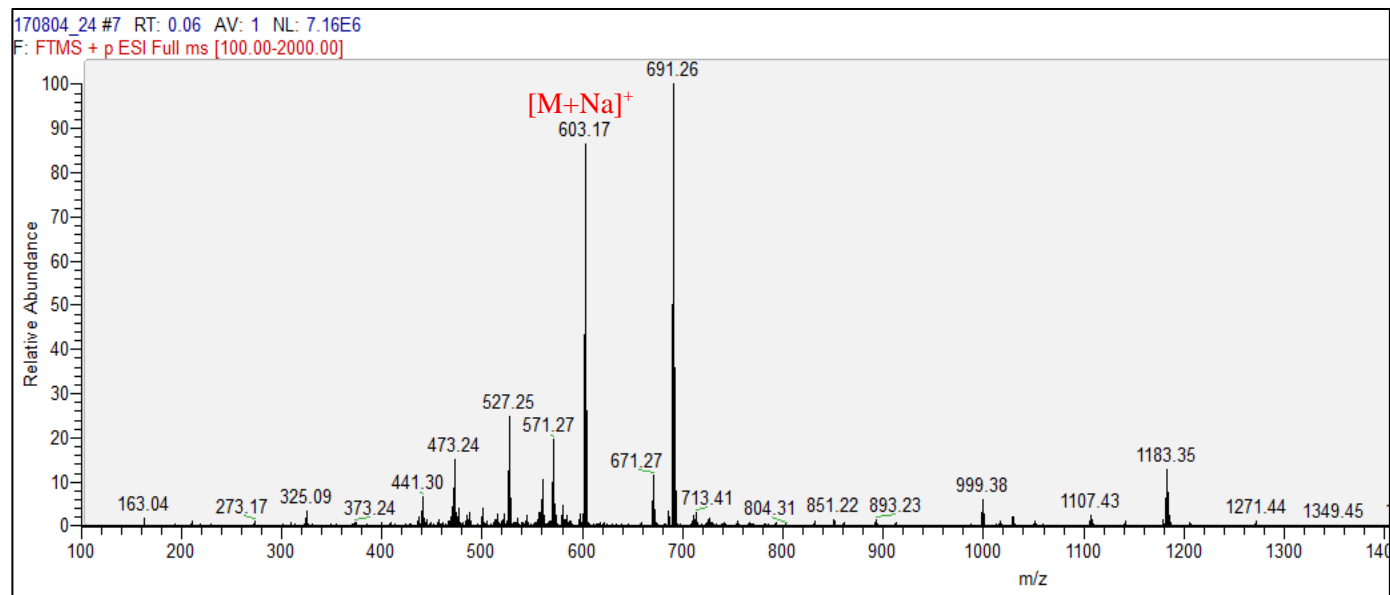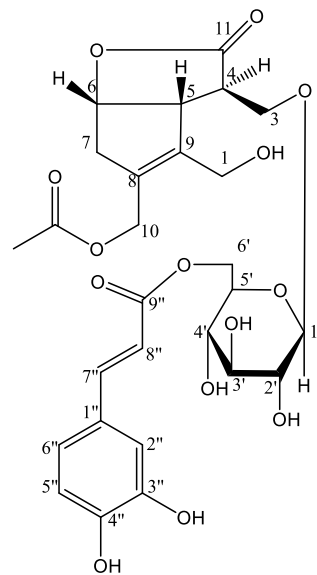

Elemental composition search on mass 603.17

m/z= 598.17-608.17

| m/z      | Theo. Mass | Delta (mmu) | RDB equiv. | Composition                                        |
|----------|------------|-------------|------------|----------------------------------------------------|
| 603.1682 | 603.1684   | -0.22       | 11.5       | C <sub>27</sub> H <sub>32</sub> O <sub>14</sub> Na |

**Figure 40.** The  $^1\text{H}$  NMR spectrum of **5** in  $\text{CD}_3\text{OD}$ , 500 MHz

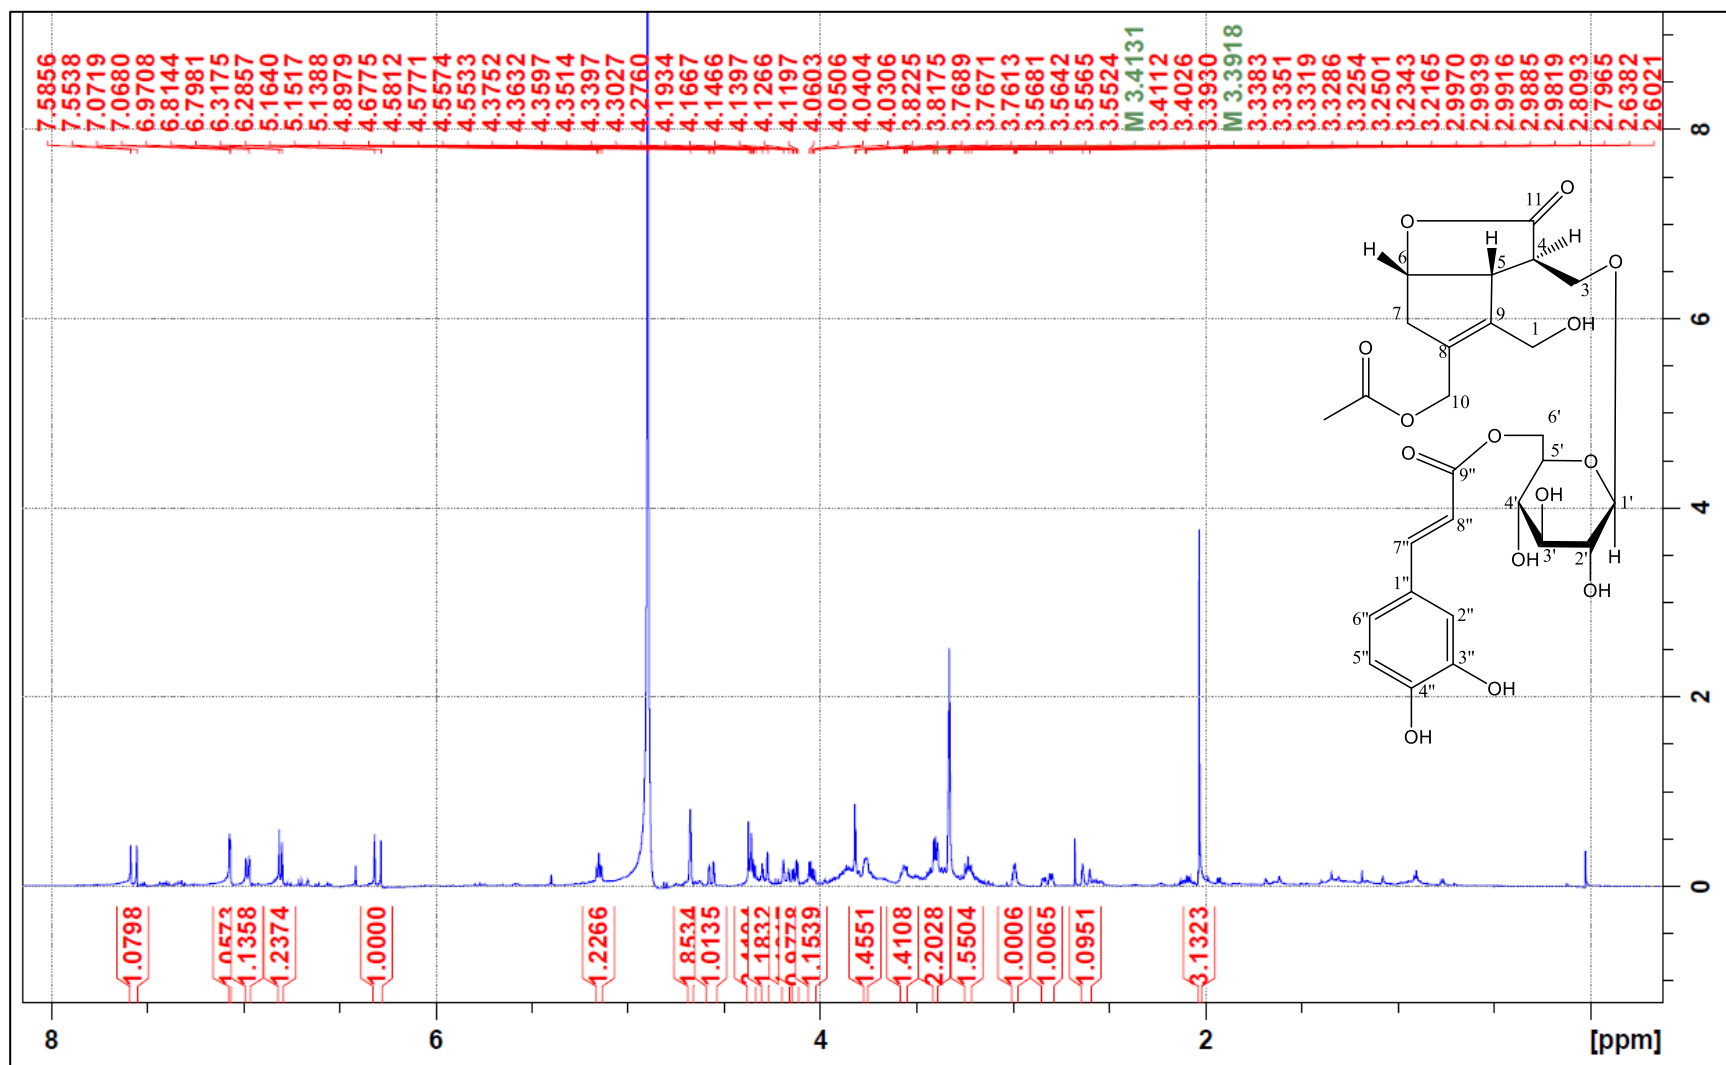

**Figure 41.** The  $^{13}\text{C}$  NMR spectrum of **5** in  $\text{CD}_3\text{OD}$ , 175 MHz.

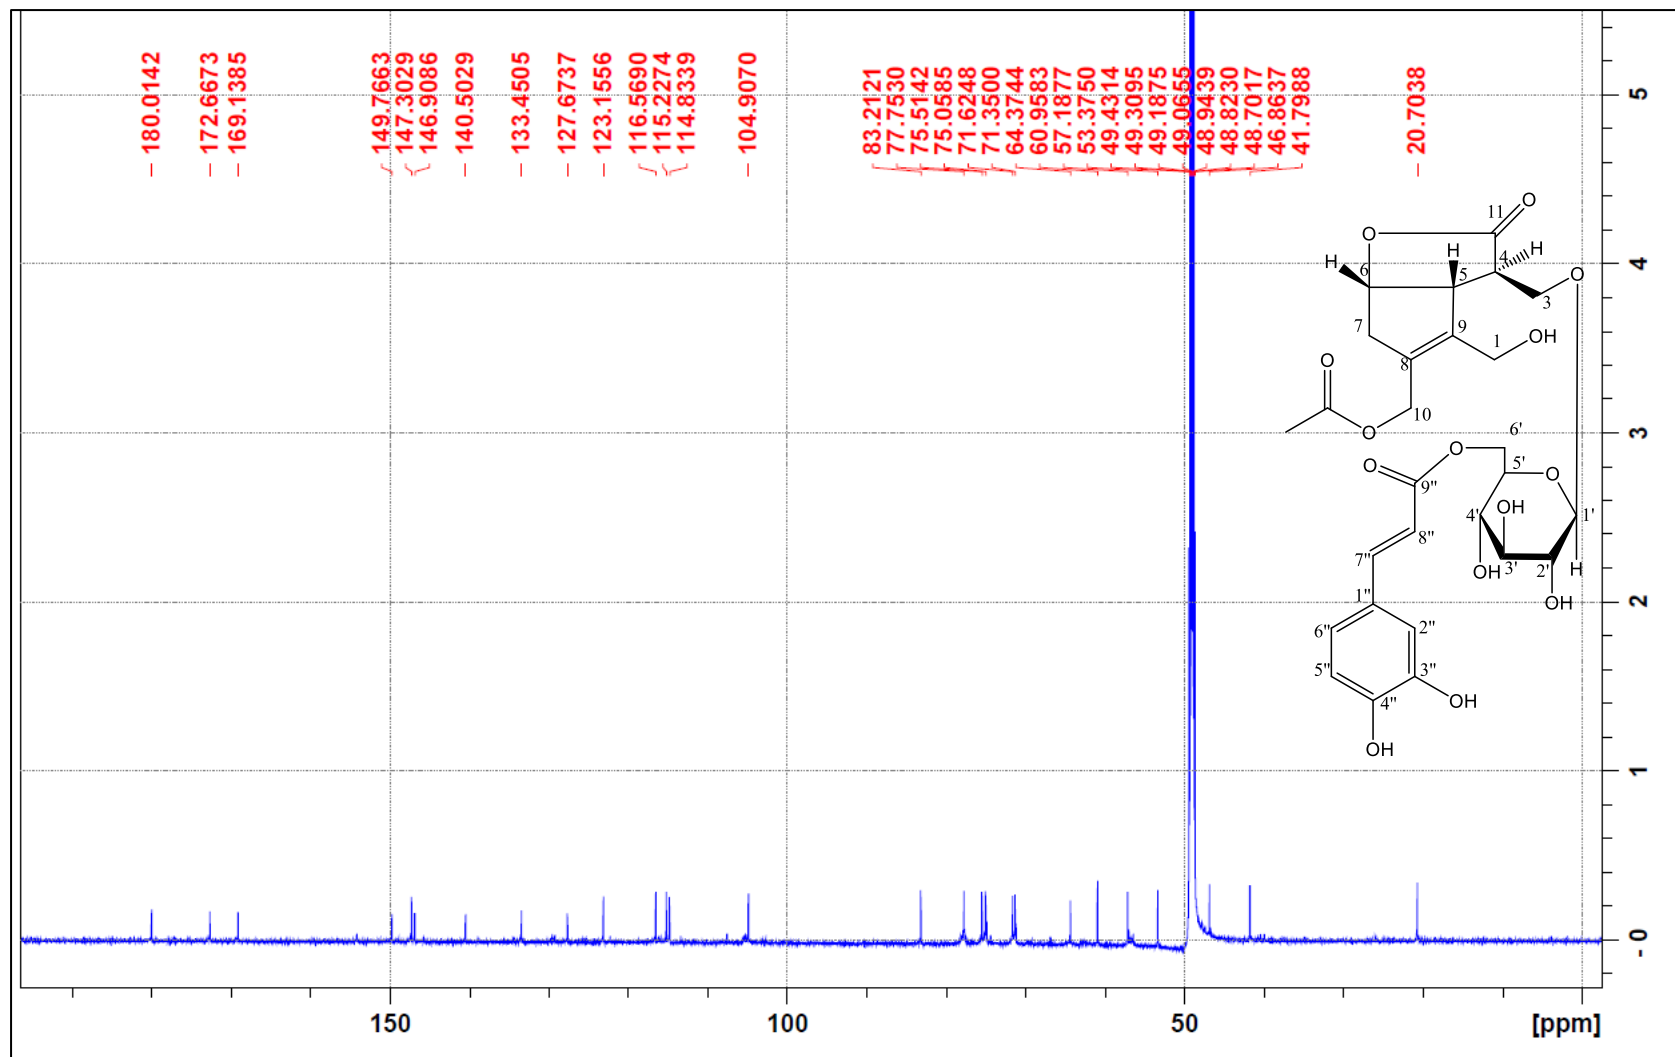

**Figure 42.** The DEPT-135 NMR spectrum of **5** in CD<sub>3</sub>OD, 175 MHz.

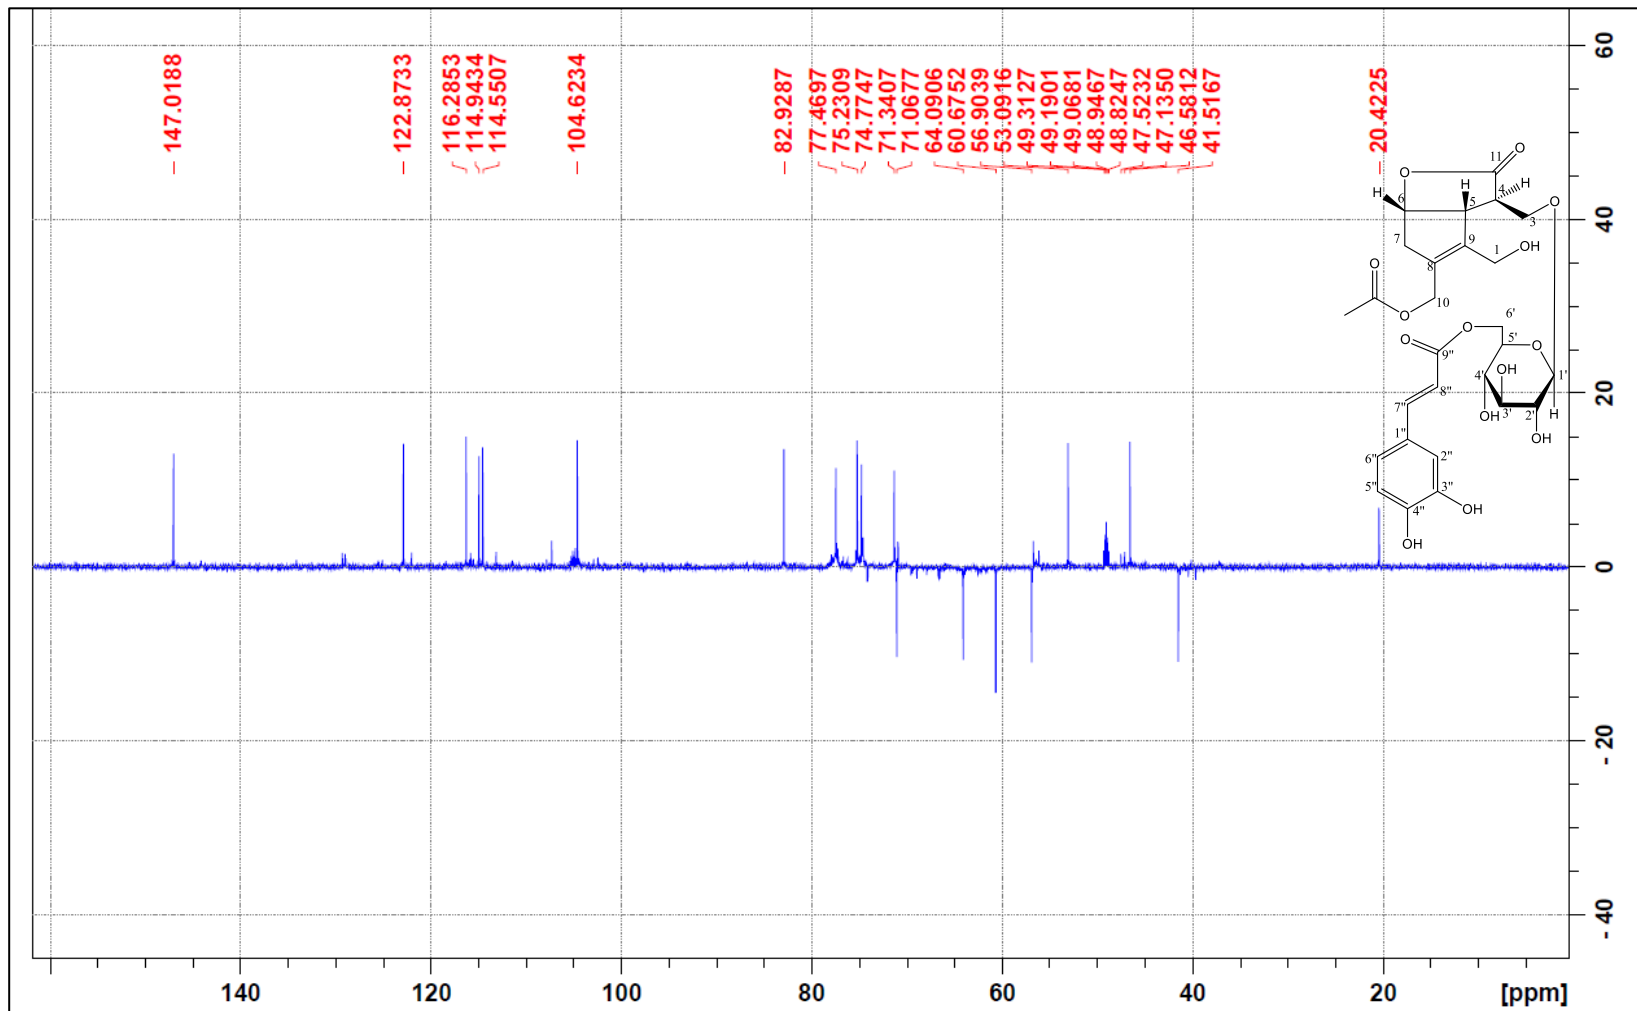

**Figure 43.** The COSY spectrum of **5** in CD<sub>3</sub>OD, 500 MHz.

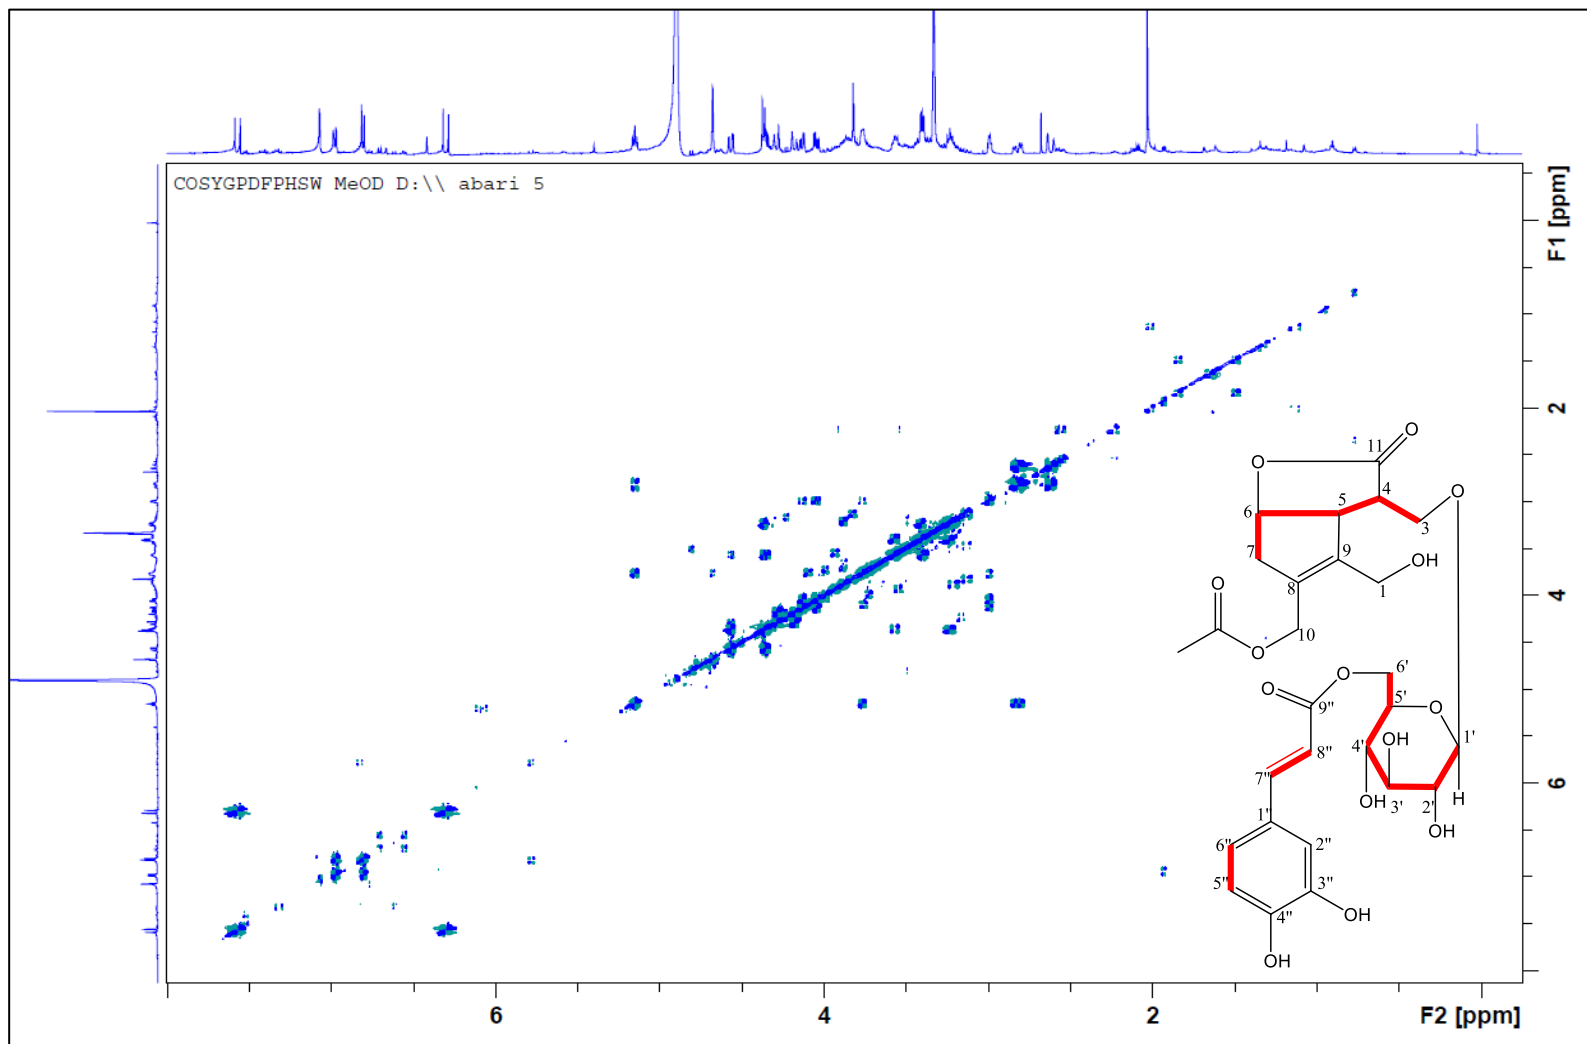

**Figure 44.** The HSQC spectrum of **5** in CD<sub>3</sub>OD, 700 MHz.

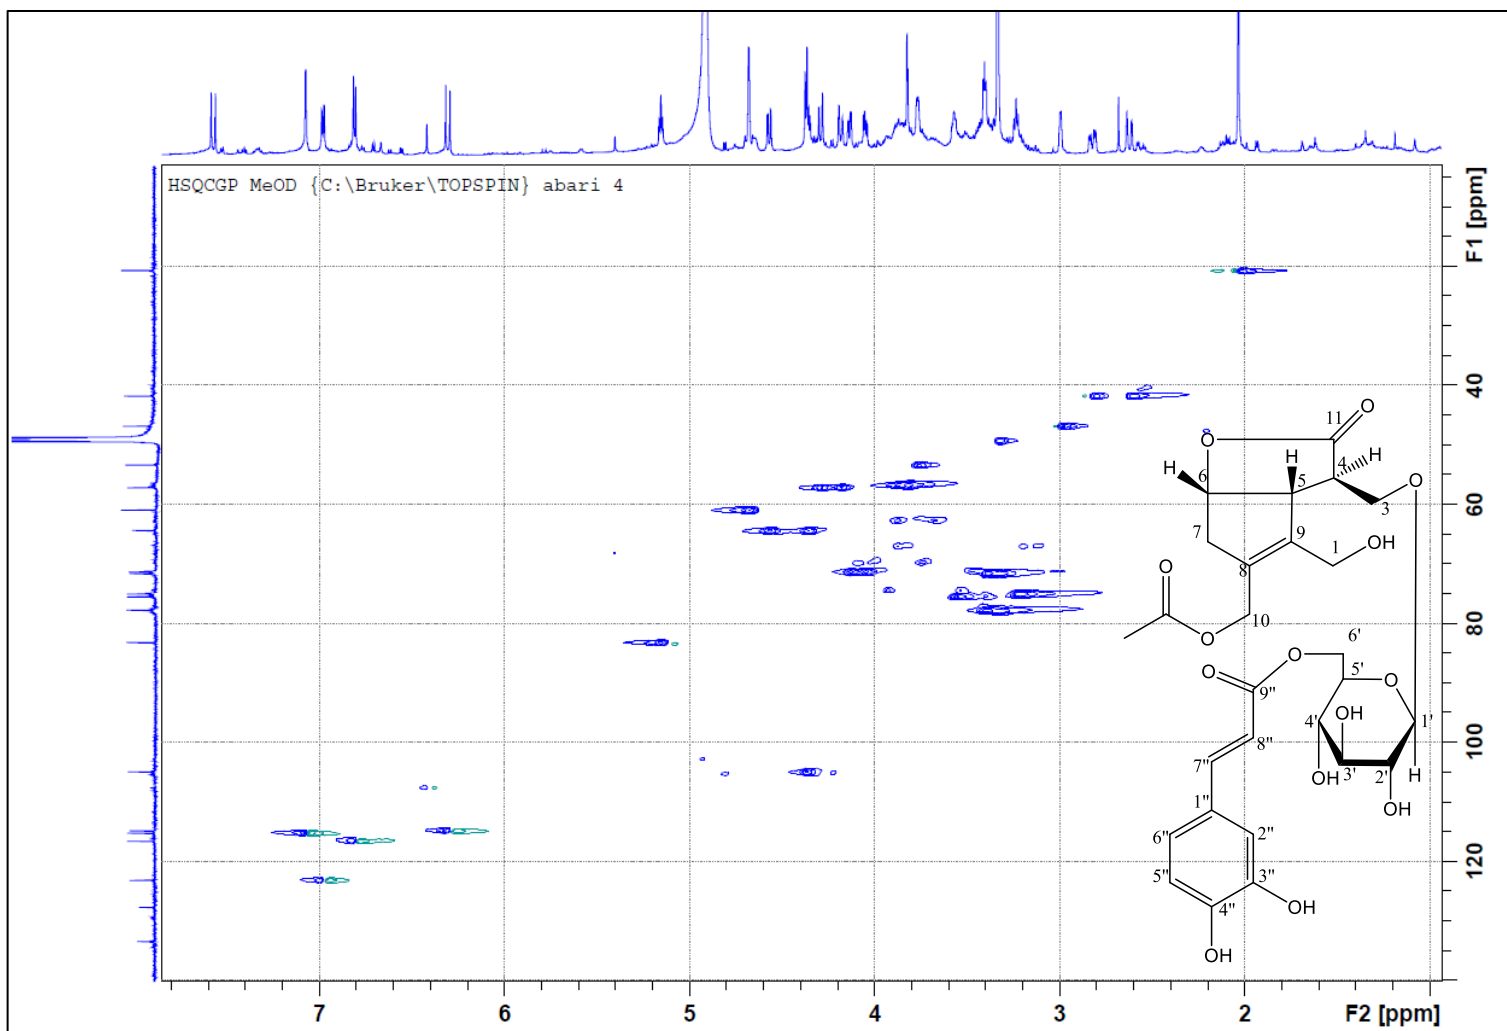

Figure 45. The HMBC spectrum of **5** in CD<sub>3</sub>OD, 700 MHz.

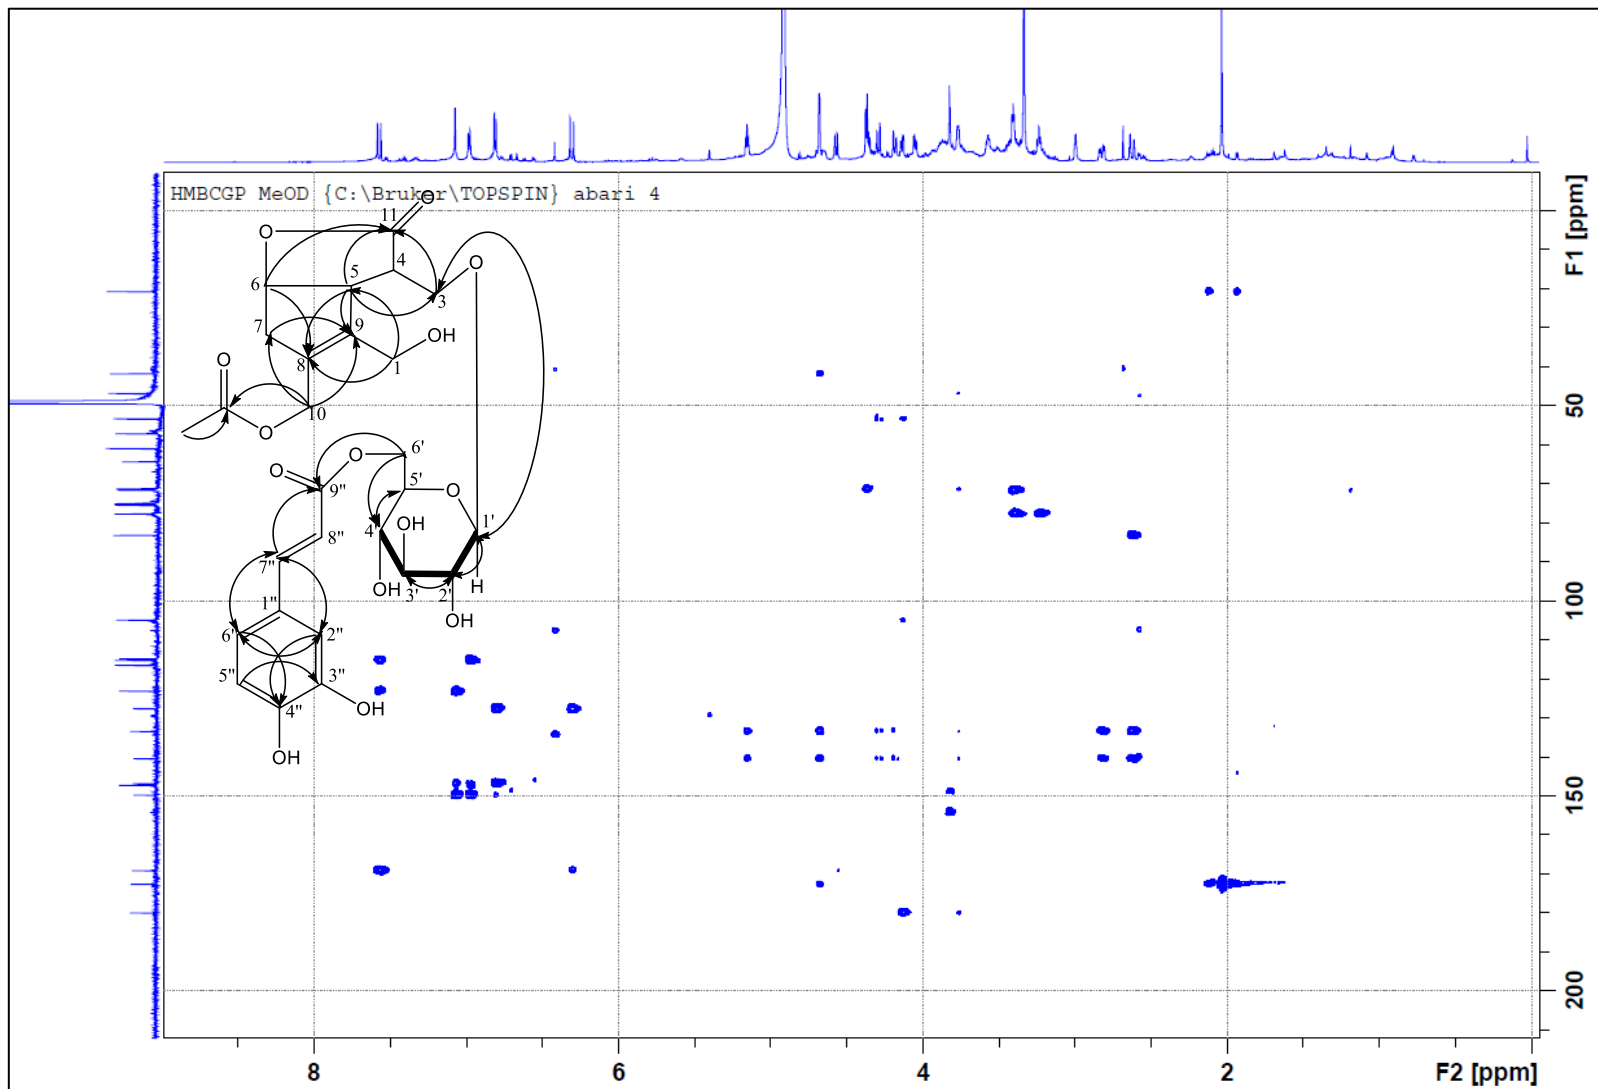



**Figure 46.** The NOESY spectrum of **5** in CD<sub>3</sub>OD, 500 MHz.

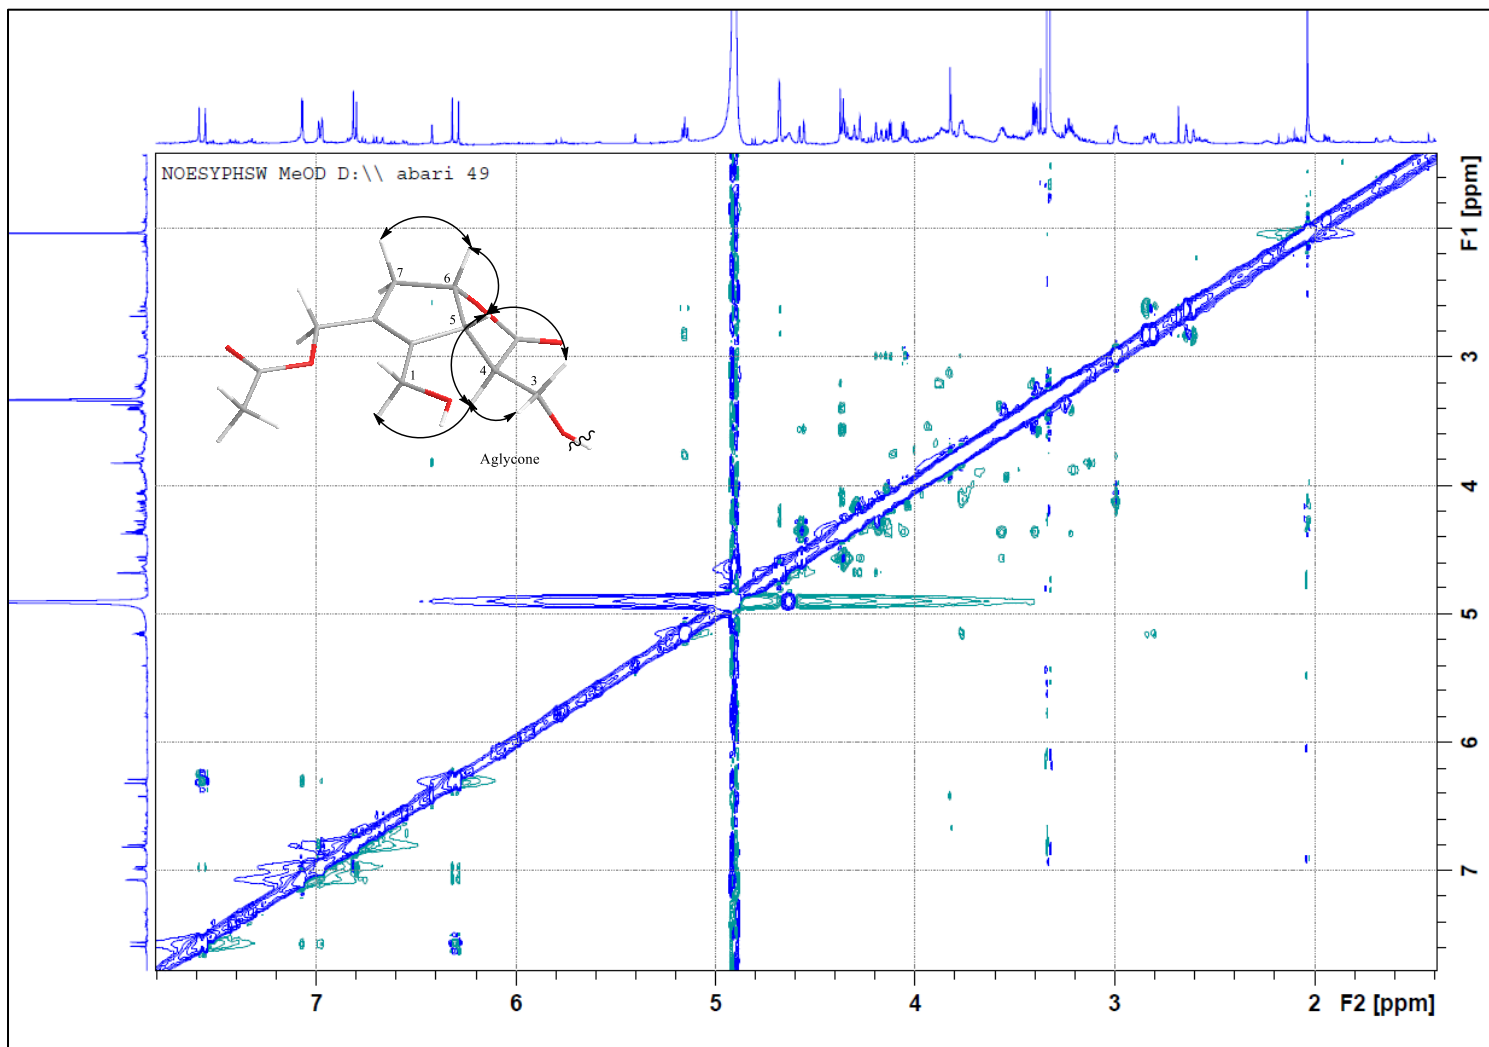

Figure 47. The IR spectrum of 5.

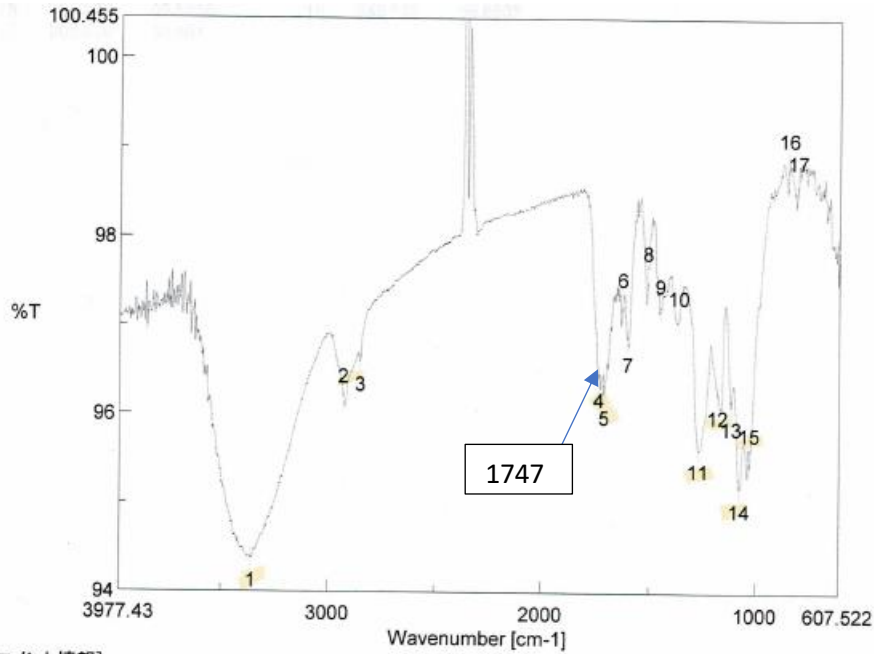

[コメント情報]

試料名  
コメント  
測定者  
所属  
会社 HU

[データ情報]

作成日時 2018/07/04 16:03  
データタイプ 等間隔データ  
横軸 Wavenumber [cm-1]  
縦軸 %T  
スタート 599.753 cm-1  
エンド 7800.65 cm-1  
データ間隔 0.964233 cm-1  
データ数 7469

[測定情報]

機種名 FT/IR-4600typeA  
シリアル番号 D015461786  
測定日時 2018/07/04 16:03  
光源 標準光源  
検出器 TGS  
積算回数 10  
分解 4 cm-1  
ゼロフィリング On  
アボダイゼーション Cosine  
ゲイン Auto (2)  
アパーチャー Auto (7.1 mm)  
スキャンスピード Auto (2 mm/sec)  
フィルタ Auto (30000 Hz)

[ピーク検出結果]

| No. | 位置      | 強度      | No. | 位置      | 強度      |
|-----|---------|---------|-----|---------|---------|
| 1   | 3361.32 | 94.3708 | 2   | 2928.38 | 96.1635 |
| 3   | 2850.27 | 96.5796 | 4   | 1738.51 | 96.4149 |
| 5   | 1714.41 | 96.2203 | 6   | 1625.7  | 97.2733 |
| 7   | 1602.56 | 96.8155 | 8   | 1509.03 | 97.576  |
| 9   | 1451.17 | 97.2008 | 10  | 1365.35 | 97.0659 |
| 11  | 1271.82 | 95.6231 | 12  | 1179.26 | 96.2215 |
| 13  | 1116.58 | 96.1    | 14  | 1078.01 | 95.1741 |

[ピーク検出結果]

| No. | 位置      | 強度      | No. | 位置      | 強度      |
|-----|---------|---------|-----|---------|---------|
| 15  | 1030.77 | 95.5256 | 16  | 848.525 | 98.8539 |
| 17  | 806.099 | 98.601  |     |         |         |

Figure 48. The UV spectrum of 5.

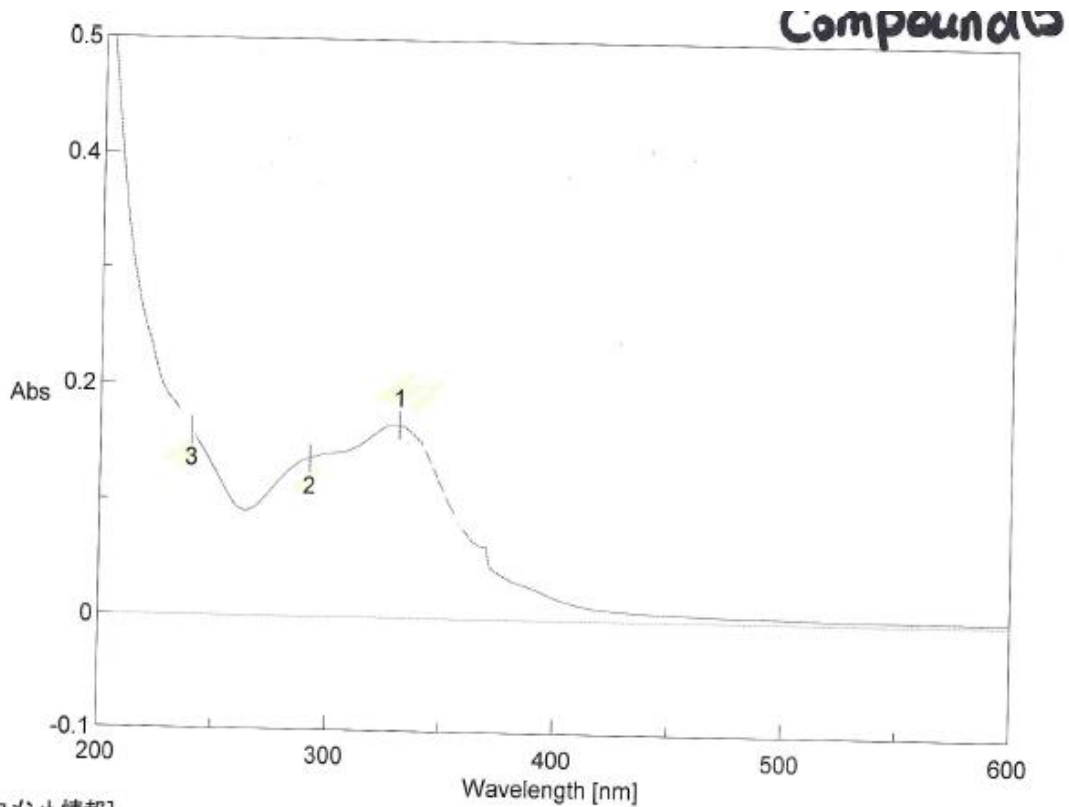

[コメント情報]

試料名  
コメント  
測定者  
所属  
会社 HU

[データ情報]

作成日時 2018/07/02 19:25  
データタイプ 等間隔データ  
横軸 Wavelength [nm]  
縦軸 Abs  
スタート 600 nm  
エンド 200 nm  
データ間隔 1 nm  
データ数 401

[測定情報]

装置名 V-630  
機種名 V-630  
シリアル番号 A042161148  
測定日時 2018/07/02 19:25  
測光モード Abs  
測定範囲 600 - 200 nm  
データ取込間隔 1 nm  
UV/Vis バンド幅 1.5 nm  
レスポンス Fast  
走査速度 400 nm/min  
光源切換 340 nm  
光源 D2/WI  
フィルタ切換 ステップ  
補正 ベースライン

[ピーク検出結果]

| No. | 位置  | 強度       | No. | 位置  | 強度       |
|-----|-----|----------|-----|-----|----------|
| 1   | 331 | 0.16674  | 2   | 292 | 0.136832 |
| 3   | 240 | 0.159461 |     |     |          |
